# Supplementary material for: Mechanochemistry Frees the Thiourea Dioxide (TDO) from the ‘Veils’ of the Solvent, Exposing All Its Reactivity
Source: Preprints.org preprint supplement (doi:10.20944/preprints202302.0062.v1), 2023-02-03
Supplement: Supplementary file 1 [file supplementary]

## SUPPORTING INFORMATION

### **Mechanochemistry frees the thiourea dioxide (TDO) from the 'veils' of the solvent, exposing all its reactivity**

**Francesco Basoccu <sup>1</sup>, Federico Cuccu <sup>1</sup>, Pietro Caboni <sup>1</sup>, Lidia De Luca <sup>2</sup> and Andrea Porcheddu <sup>1\*</sup>**

<sup>1</sup>Dipartimento di Scienze Chimiche e Geologiche, Università degli Studi di Cagliari, Cittadella Universitaria, Monserrato, 09042 Cagliari, Italy;

<sup>2</sup> Department of Chemical, Physical, Mathematical, and Natural Sciences, University of Sassari, via Vienna 2, 07100 Sassari, Italy, [ldeluca@uniss.it](mailto:ldeluca@uniss.it) ;

Correspondence: [porcheddu@unica.it](mailto:porcheddu@unica.it) (A.P.)

Number of pages: 48

Number of figures: 2

Number of schemes: 2

Number of tables: -

## Table of Content

|                                                                                                                       |    |
|-----------------------------------------------------------------------------------------------------------------------|----|
| 1. General information.....                                                                                           | 3  |
| 2. Mechanochemical synthesis of <b>3a-j</b> , <b>3o-p</b> , <b>3s</b> and <b>4d-n</b> , <b>4o</b> , <b>4q-r</b> ..... | 4  |
| 3. Green Metrics calculations .....                                                                                   | 14 |
| 4. Spectra.....                                                                                                       | 19 |
| 5. References.....                                                                                                    | 47 |

## 1. General information

Commercially available reagents were purchased from Acros, Aldrich, Strem Chemicals, Alfa-Aesar, TCI Europe, and used as received. All reactions were monitored by thin-layer chromatography (TLC) performed on glass-backed silica gel 60 F254, 0.2 mm plates (Merck), and compounds were visualized under UV light (254 nm) or using cerium ammonium molybdate solution with subsequent heating. The eluents were technical grade. Mechanochemical reactions were carried out using a Retsch MM500 Vario apparatus. The reagents were milled using a stainless-steel grinding jar (10 mL) equipped with two balls ( $\phi = 7.0$  mm, 2.67 g) of the same material. These parameters were applied if not stated otherwise.  $^1\text{H}$  and  $^{13}\text{C}$  liquid NMR spectra were recorded on a Varian 600 MHz and Bruker Avance III HD 600 MHz NMR spectrometer at 298 K and were calibrated using trimethylsilane (TMS). Proton chemical shifts are expressed in parts per million (ppm,  $\delta$  scale) and are referred to the residual hydrogen in the solvent ( $\text{CHCl}_3$ , 7.27 ppm or DMSO 2.54 ppm). Data are represented as follows: chemical shift, multiplicity (s = singlet, d = doublet, t = triplet, q = quartet, m = multiplet and/or multiple resonances, bs = broad singlet, and combination of thereof), coupling constant (J) in Hertz (Hz) and integration. Carbon chemical shifts are expressed in parts per million (ppm,  $\delta$  scale) and are referenced to the carbon resonances of the NMR solvent ( $\text{CDCl}_3$ ,  $\delta$  77.0 ppm or  $\delta$  DMSO- $\text{d}_6$   $\delta$  39.5 ppm). Deuterated NMR solvents were obtained from Aldrich. Samples were analyzed using an Agilent 5977B MS interfaced to the GC 7890B equipped with a DB-5ms column (J & W), injector temperature at 230 °C, detector temperature at 280 °C, helium carrier gas flow rate of 1 ml/min. The GC oven temperature program was 60 °C initial temperature with 4 min hold time and ramping at 15°C/min to a final temperature of 270°C with 7 min hold time. 1  $\mu\text{L}$  of each sample was injected in split (1:20) mode. After a solvent delay of 3 minutes mass spectra were acquired in full scan mode using 2.28 scans/s with a mass range of 50–500 Amu. Retention times of different compounds were determined by injecting pure compound under identical conditions. All the experiments were carried out in duplicate to ensure reproducibility of the experimental data. Yields refer to pure isolated materials.

## 2. Mechanochemical synthesis of **3a-j**, **3o-p**, **3s** and **4d-n**, **4o**, **4q-r**

### General procedure A for anilines and *o*-phenylenediamines **3a-j**, **3o-p**, **3s** synthesis from 2-nitroanilines **2a-j**, **2o-p**, **2s**

A 10 mL stainless steel jar equipped with 2 stainless steel milling balls (7 mm diameter, 2.67 g) was filled with nitrobenzenes **2a-j**, **2o-p**, **2s** (1.00 mmol), NaOH (6.00 mmol), **1** (3.00 mmol) and 250  $\mu$ L of distilled water. The vessel was then closed and the mechanochemical reaction was conducted, ranging from 60 to 180 min at a frequency of 30 Hz. Whenever necessary, further purification through flash column chromatography has been made. Lastly, the solvent was removed under reduced pressure to afford the pure anilines **3a-j**, **3o-p**, **3s**.

### General procedure B for heterocycles **4l-n**, **4q-r** synthesis from *o*-phenylenediamines **3l-n**, **3q-r**

A 10 mL stainless steel jar equipped with 2 stainless steel milling balls (7.0 mm diameter, 2.67 g) was filled with *o*-phenylenediamines **3l-n**, **3q-r** (1.00 mmol), **1** (3.00 mmol) and 200  $\mu$ L of distilled water. The vessel was then closed, and the mechanochemical reaction was conducted, ranging from 60 min to 180 min at a frequency of 30 Hz. At the end of the reaction, an additional silica pad (SiO<sub>2</sub>, heptane/ethyl acetate/methanol = 1:1:0 $\rightarrow$ 6:3:1) was made to purify the reaction mixture. Lastly, the solvent was removed under reduced pressure to afford the pure heterocycle **4l-n**, **4q-r**.

### General procedure C for heterocycles **4d-k**, **4o** synthesis from 2-nitroanilines **2d-k**, **2o**

A 10 mL stainless steel jar equipped with 2 stainless steel milling balls (7.0 mm diameter, 2.67 g) was filled with 2-nitroanilines **2d-k**, **2o** (1.00 mmol), NaOH (6.00 mmol), **1** (3.00 mmol) and 250  $\mu$ L of distilled water. The vessel was then closed and the mechanochemical reaction was conducted, ranging from 60 to 180 min at a frequency of 30 Hz. At the end of the reaction, it was made an additional refill of **1** (3.00 mmol) and 60  $\mu$ L of distilled water and the mechanochemical reaction was run ranging from 60 to 180 min at a frequency of 30 Hz. At the end of the reaction, an additional silica pad (SiO<sub>2</sub>, hexane/ethyl acetate/methanol = 1:1:0 $\rightarrow$ 6:3:1) was made to purify the reaction mixture. Lastly, the solvent was removed under reduced pressure to afford the pure heterocycle **4d-k**, **4o**.

#### Aniline **3a**

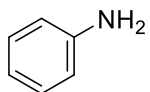

The title compound was synthesized according to the general procedure A. **2a** (123.11 mg, 1.00 mmol), NaOH (239.98 mg, 6.00 mmol), **1** (324.36 mg, 3.00 mmol), and 250  $\mu$ L of distilled water were used, to afford **3a** as a colorless liquid (90.34 mg, 0.97 mmol, 97%).

<sup>1</sup>H NMR (600 MHz, CDCl<sub>3</sub>)  $\delta$  = 7.20 (t, *J* = 9.0 Hz, 2H), 6.81 (t, 1H), 6.71 (d, *J* = 9.0 Hz, 2H), 3.65 (bs, 2H).

<sup>13</sup>C NMR (151 MHz, CDCl<sub>3</sub>)  $\delta$  = 146.5, 129.3, 118.6, 115.2.

The spectroscopic data closely match the ones previously reported in the literature.[1]

## 2-Ethylaniline **3b**

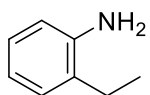

The title compound was synthesized according to the general procedure **A**. **2b** (151.2 mg, 1.0 mmol), NaOH (239.98 mg, 6.0 mmol), **1** (324.36 mg, 3.0 mmol), and 250  $\mu$ L of distilled water were used, to afford **3b** as a colourless liquid (117.54 mg, 0.97 mmol, 97%).

**<sup>1</sup>H NMR (600 MHz, CDCl<sub>3</sub>)**  $\delta$  = 7.10 – 7.07 (m, 1H), 7.05 (td,  $J$  = 7.6, 1.6 Hz, 1H), 6.76 (td,  $J$  = 7.6, 1.6 Hz, 1H), 6.69 (dd,  $J$  = 7.9, 1.3 Hz, 1H), 3.62 (s, 2H), 2.53 (q,  $J$  = 7.5 Hz, 2H), 1.26 (t,  $J$  = 7.5 Hz, 3H).

**<sup>13</sup>C NMR (151 MHz, CDCl<sub>3</sub>)**  $\delta$  = 144.1, 128.5, 128.2, 126.9, 119.0, 115.5, 24.1, 13.1.

The spectroscopic data closely match the ones previously reported in the literature.[2]

## 4-Methoxyaniline **3c**

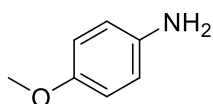

The title compound was synthesized according to the general procedure **A**. **2a** (153.14 mg, 1.00 mmol), NaOH (239.98 mg, 6.00 mmol), **1** (324.36 mg, 3.00 mmol), and 250  $\mu$ L of distilled water were used, to afford **3a** as a colorless liquid (118.23 mg, 0.96 mmol, 96%).

**<sup>1</sup>H NMR (600 MHz, CDCl<sub>3</sub>)**  $\delta$  = 6.75 (d,  $J$  = 8.8 Hz, 2H), 6.65 (d,  $J$  = 8.8 Hz, 2H), 3.75 (s, 3H), 3.35 (bs, 2H).

**<sup>13</sup>C NMR (151 MHz, CDCl<sub>3</sub>)**  $\delta$  = 152.9, 140.1, 116.5, 114.9, 55.8.

The spectroscopic data closely match the ones previously reported in the literature.[2]

## Benzene-1,2-diamine **3d**

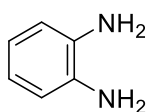

The title compound was synthesized according to the general procedure **A**. **2d** (138.13 mg, 1.00 mmol), NaOH (239.98 mg, 6.00 mmol), **1** (324.36 mg, 3.00 mmol), and 250  $\mu$ L of distilled water were used, to afford **3d** as a light brown solid (105.98 mg, 0.98 mmol, 98%).

**<sup>1</sup>H NMR (600 MHz, CDCl<sub>3</sub> + DMSO-*d*<sub>6</sub>)**  $\delta$  = 6.58 (dt,  $J$  = 6.0, 3.4 Hz, 2H), 6.51 (dd,  $J$  = 6.0, 4.9, 3.4 Hz, 2H).

**<sup>13</sup>C NMR (151 MHz, CDCl<sub>3</sub> + DMSO-*d*<sub>6</sub>)**  $\delta$  = 134.5, 118.5, 115.5, 115.4.

The spectroscopic data closely match the previously reported in the literature[3].

### 3-Methylbenzene-1,2-diamine **3e**

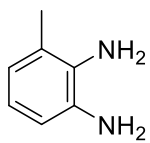

The title compound was synthesized according to the general procedure **A**. **2e** (152.2 mg, 1.00 mmol), NaOH (239.98 mg, 6.00 mmol), **1** (324.36 mg, 3.00 mmol) and 250  $\mu$ L of distilled water were used, to afford **3e** as a brownish solid (118.50 mg, 0.97 mmol, 97%).

$^1\text{H}$  NMR (600 MHz,  $\text{CDCl}_3$ )  $\delta$  = 6.67 – 6.71 (m, 3H), 3.38 (bs, 4H), 2.21 (s, 3H).

$^{13}\text{C}$  NMR (151 MHz,  $\text{CDCl}_3$ )  $\delta$  = 134.0, 133.6, 123.5, 122.2, 119.2, 115.2, 17.5.

The spectroscopic data closely match the ones previously reported in the literature [4].

### N-Methylbenzene-1,2-diamine **3f**

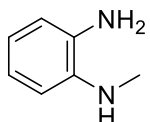

The title compound was synthesized according to the general procedure **A**. **2f** (152.15 mg, 1.00 mmol), NaOH (239.98 mg, 6.00 mmol), **1** (324.36 mg, 3.00 mmol) and 250  $\mu$ L of distilled water were used, to afford **3f** as a black liquid (117.28 mg, 0.96 mmol, 96%).

$^1\text{H}$  NMR (600 MHz,  $\text{CDCl}_3$ )  $\delta$  = 6.96 (ddd,  $J$  = 7.8, 6.7, 2.2, Hz, 1H), 6.82 – 6.72 (m, 3H), 3.41 (s, 3H), 2.91 (bs, 3H).

$^{13}\text{C}$  NMR (151 MHz,  $\text{CDCl}_3$ )  $\delta$  = 138.9, 134.1, 120.7, 118.3, 116.2, 110.9, 30.9.

The spectroscopic data closely match the ones previously reported in the literature [5].

### 4-Bromobenzene-1,2-diamine **3g**

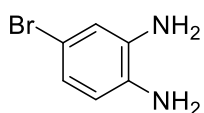

The title compound was synthesized according to the general procedure **A**. **2a** (217.02 mg, 1.00 mmol), NaOH (239.98 mg, 6.00 mmol), **1** (324.36 mg, 3.00 mmol), and 250  $\mu$ L of distilled water were used, to afford **3a** as a yellowish solid (181.43 mg, 0.97 mmol, 97%).

$^1\text{H}$  NMR (600 MHz,  $\text{CDCl}_3$ )  $\delta$  = 6.74 – 6.69 (m, 3H), 3.28 (bs, 4H).

$^{13}\text{C}$  NMR (151 MHz,  $\text{CDCl}_3$ )  $\delta$  = 134.9, 120.4, 116.9.

The spectroscopic data closely match the ones previously reported in the literature [6].

### 4,5-Dichlorobenzene-1,2-diamine **3h**

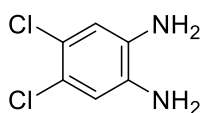

The title compound was synthesized according to the general procedure **A**. **2h** (207.01 mg, 1.00 mmol), NaOH (239.98 mg, 6.00 mmol), **1** (324.36 mg, 3.00 mmol), and 250  $\mu$ L of distilled water were used, to afford **3h** as a yellow solid (168.18 mg, 0.95 mmol, 95%).

**<sup>1</sup>H NMR (600 MHz, DMSO-*d*<sub>6</sub>)**  $\delta$  = 6.62 (s, 2H), 4.85 (bs, 4H).

**<sup>13</sup>C NMR (151 MHz, DMSO-*d*<sub>6</sub>)**  $\delta$  = 135.6, 117.3, 114.3.

The spectroscopic data closely match the ones previously reported in the literature [7].

#### 4-Methoxybenzene-1,2-diamine **3i**

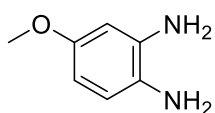

The title compound was synthesized according to the general procedure **A. 2i** (168.15 mg, 1.00 mmol), NaOH (239.98 mg, 6.00 mmol), **1** (324.36 mg, 3.00 mmol), and 250  $\mu$ L of distilled water were used, to afford **3i** as a dark red solid (105.01 mg, 0.76 mmol, 76%).

**<sup>1</sup>H NMR (600 MHz, CDCl<sub>3</sub>)**  $\delta$  = 6.63 (d, *J* = 8.4 Hz, 1H), 6.32 (d, *J* = 2.8 Hz, 1H), 6.26 (dd, *J* = 8.4, 2.7 Hz, 1H), 3.72 (s, 3H).

**<sup>13</sup>C NMR (151 MHz, CDCl<sub>3</sub>)**  $\delta$  = 154.6, 137.1, 127.4, 118.3, 104.1, 103.0, 55.6.

The spectroscopic data closely match the ones previously reported in the literature [8].

#### 4-(Trifluoromethoxy) benzene-1,2-diamine **3j**

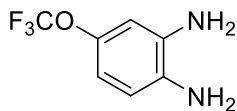

The title compound was synthesized according to the general procedure **A. 2j** (222.12 mg, 1.00 mmol), NaOH (239.98 mg, 6.00 mmol), **1** (324.36 mg, 3.00 mmol), and 250  $\mu$ L of distilled water were used, to afford **3j** as a yellow solid (178.69 mg, 0.93 mmol, 93%).

**<sup>1</sup>H NMR (600 MHz, CDCl<sub>3</sub>)**  $\delta$  = 6.65 (d, *J* = 8.1 Hz, 1H), 6.58 – 6.56 (m, 2H), 3.40 (bs, 4H).

**<sup>13</sup>C NMR (151 MHz, CDCl<sub>3</sub>)**  $\delta$  = 142.9, 136.0, 133.2, 121.6, 119.9, 117.0, 112.4, 109.6.

**<sup>19</sup>F NMR (565 MHz, CDCl<sub>3</sub>)**  $\delta$  = -58.19.

**HRMS:** calculated for C<sub>7</sub>H<sub>7</sub>F<sub>3</sub>N<sub>2</sub>O: 193.0589 [*M*+*H*]<sup>+</sup>; found: 193.0580.

#### Pyridine-2,3-diamine **3o**

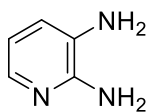

The title compound was synthesized according to the general procedure **A. 2o** (139.11 mg, 1.00 mmol), NaOH (239.98 mg, 6.00 mmol), **1** (324.36 mg, 3.00 mmol), and 250  $\mu$ L of distilled water were used, to afford **3o** as a yellow solid (103.67 mg, 0.95 mmol, 95%).

**<sup>1</sup>H NMR (600 MHz, CDCl<sub>3</sub>)**  $\delta$  = 7.65 (dd, *J* = 5.0, 1.5 Hz, 1H), 6.88 (dd, *J* = 7.5, 1.5 Hz, 1H), 6.62 (dd, *J* = 7.5, 5.0 Hz, 1H), 4.26 (bs, 2H), 3.31 (bs, 2H).

$^{13}\text{C}$  NMR (151 MHz,  $\text{CDCl}_3$ )  $\delta$  = 149.4, 138.9, 129.2, 122.6, 115.8.

The spectroscopic data closely match the ones previously reported in the literature [6].

### $N^1$ -Benzylbenzene-1,2-diamine **3p**

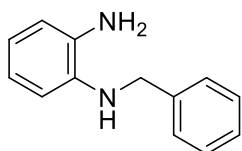

The title compound was synthesized according to the general procedure A. **2p** (228.25 mg, 1.00 mmol), NaOH (239.98 mg, 6.00 mmol), **1** (324.36 mg, 3.00 mmol), and 250  $\mu\text{L}$  of distilled water were used, to afford **3p** as a white solid (158.62 mg, 0.80 mmol, 80%).

$^1\text{H}$  NMR (600 MHz,  $\text{CDCl}_3$ )  $\delta$  = 7.42 – 7.40 (m, 2H), 7.36 (dd,  $J$  = 8.4, 6.8 Hz, 2H), 7.30 (d,  $J$  = 7.3 Hz, 1H), 6.81 (td,  $J$  = 7.5, 1.6 Hz, 1H), 6.75 (dd,  $J$  = 7.6, 1.6 Hz, 1H), 6.72 – 6.68 (m, 2H), 4.33 (s, 2H), 3.47 (bs, 3H).

$^{13}\text{C}$  NMR (151 MHz,  $\text{CDCl}_3$ )  $\delta$  = 139.6, 137.9, 134.3, 128.8, 127.9, 127.4, 120.9, 119.0, 116.7, 112.2, 48.8.

The spectroscopic data closely match the ones previously reported in the literature [9].

### (3-Amino-4-chlorophenyl) (phenyl)methanone **3s**

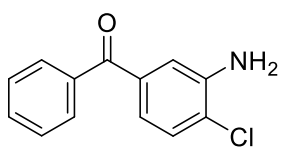

The title compound was synthesized according to the general procedure A. **2s** (261.66 mg, 1.00 mmol), NaOH (239.98 mg, 6.00 mmol), **1** (324.36 mg, 3.00 mmol), and 250  $\mu\text{L}$  of distilled water were used, to afford **3s** as a yellowish solid (220.10 mg, 0.94 mmol, 94%).

$^1\text{H}$  NMR (600 MHz,  $\text{CDCl}_3$ )  $\delta$  = 7.79 – 7.77 (m, 2H), 7.60 – 7.57 (m, 1H), 7.47 (t,  $J$  = 7.7 Hz, 2H), 7.34 (d,  $J$  = 8.2 Hz, 1H), 7.22 (d,  $J$  = 2.0 Hz, 1H), 7.07 (dd,  $J$  = 8.2, 2.0 Hz, 1H), 4.21 (bs, 2H).

$^{13}\text{C}$  NMR (151 MHz,  $\text{CDCl}_3$ )  $\delta$  = 196.1, 143.1, 137.6, 137.2, 132.6, 130.1, 129.3, 128.4, 123.6, 120.9, 116.9.

HRMS: calculated for  $\text{C}_{13}\text{H}_{10}\text{ClNO}$ : 232.0529  $[M+H]^+$ ; found: 232.0523.

### 1H-Benzo[d]imidazole **4d**

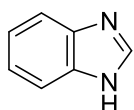

The title compound was synthesized according to the general procedure C. **2d** (138.13 mg, 1.00 mmol), NaOH (239.98 mg, 6.00 mmol), **1** (324.36 mg, 3.00 mmol), and 250  $\mu\text{L}$  of distilled water were used. After that, **1** (324.36 mg, 3.00 mmol) and 60  $\mu\text{L}$  of distilled water were added. Lastly, an additional silica pad was made to afford **4d** as a white solid (111.05 mg, 0.94 mmol, 94%).

$^1\text{H}$  NMR (600 MHz,  $\text{DMSO}-d_6$ )  $\delta$  = 12.42 (bs, 1H), 8.20 (s, 1H), 7.58 (s, 2H), 7.19 – 7.17 (m, 2H).

$^{13}\text{C}$  NMR (151 MHz,  $\text{DMSO}-d_6$ )  $\delta$  = 141.9, 122.1, 121.3, 119.0, 111.6.



The spectroscopic data closely match the ones previously reported in the literature [10].

#### 4-Methyl-1H-benzo[d]imidazole **4e**

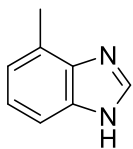

The title compound was synthesized according to the general procedure C. **2e** (152.15 mg, 1.00 mmol), NaOH (239.98 mg, 6.00 mmol), **1** (324.36 mg, 3.00 mmol), and 250  $\mu$ L of distilled water were used. After that, **1** (324.36 mg, 3.00 mmol) and 60  $\mu$ L of distilled water were added. Lastly, an additional silica pad was made to afford **4e** as a white solid (120.27 mg, 0.91 mmol, 91%).

**<sup>1</sup>H NMR (600 MHz, DMSO-*d*<sub>6</sub>)**  $\delta$  = 12.44 (bs, 1H), 8.17 (s, 1H), 7.39 (d, *J* = 8.0 Hz, 1H), 7.07 (t, *J* = 7.6 Hz, 1H), 6.98 (d, *J* = 7.2 Hz, 1H), 2.52 (s, 3H).

**<sup>13</sup>C NMR (151 MHz, DMSO-*d*<sub>6</sub>)**  $\delta$  = 141.3, 122.0, 121.7, 16.8.

The spectroscopic data closely match the ones previously reported in the literature [11].

#### 4-Methyl-1H-benzo[d]imidazole **4f**

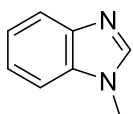

The title compound was synthesized according to the general procedure C. **2f** (152.15 mg, 1.00 mmol), NaOH (239.98 mg, 6.00 mmol), **1** (324.36 mg, 3.00 mmol) and 250  $\mu$ L of distilled water were used. After that, **1** (324.36 mg, 3.00 mmol) and 60  $\mu$ L of distilled water were added. Lastly, an additional silica pad was made for affording **4f** as a white solid (122.92 mg, 0.93 mmol, 93%).

**<sup>1</sup>H NMR (600 MHz, DMSO-*d*<sub>6</sub>)**  $\delta$  = 8.17 (bs, 1H), 7.67 – 7.63 (m, 1H), 7.55 (dd, *J* = 8.0, 1.2 Hz, 1H), 7.27 (t, *J* = 7.5 Hz, 1H), 7.21 (td, *J* = 7.5, 1.2 Hz, 1H), 3.83 (s, 3H).

**<sup>13</sup>C NMR (151 MHz, DMSO-*d*<sub>6</sub>)**  $\delta$  = 144.5, 143.3, 134.6, 122.2, 121.4, 119.3, 110.1, 30.6.

The spectroscopic data closely match the ones previously reported in the literature [11].

#### 4-Methyl-1H-benzo[d]imidazole **4g**

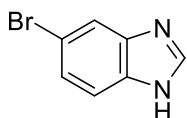

The title compound was synthesized according to the general procedure C. **2g** (217.02 mg, 1.00 mmol), NaOH (239.98 mg, 6.00 mmol), **1** (324.36 mg, 3.00 mmol), and 250  $\mu$ L of distilled water were used. After that, **1** (324.36 mg, 3.00 mmol) and 60  $\mu$ L of distilled water were added. Lastly, an additional silica pad was made to afford **4g** as a white solid (181.28 mg, 0.92 mmol, 92%).

**<sup>1</sup>H NMR (600 MHz, DMSO-*d*<sub>6</sub>)**  $\delta$  = 12.61 (s, 1H), 8.25 (s, 1H), 7.79 (s, 1H), 7.55 (d, *J* = 8.5 Hz, 1H), 7.32 (dd, *J* = 8.5, 1.9 Hz, 1H).

**<sup>13</sup>C NMR (151 MHz, DMSO-*d*<sub>6</sub>)**  $\delta$  = 143.3, 124.7, 114.1.

The spectroscopic data closely match the ones previously reported in the literature [12].

#### 5,6-Dichloro-1H-benzo[d]imidazole **4h**

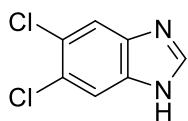

The title compound was synthesized according to the general procedure **C. 2h** (207.01 mg, 1.00 mmol), NaOH (239.98 mg, 6.00 mmol), **1** (324.36 mg, 3.00 mmol) and 250  $\mu$ L of distilled water were used. After that, **1** (324.36 mg, 3.00 mmol) and 60  $\mu$ L of distilled water were added. Lastly, an additional silica pad was made for affording **4h** as a white solid (168.32 mg, 0.90 mmol, 90%).

**<sup>1</sup>H NMR (600 MHz, DMSO-*d*<sub>6</sub>)**  $\delta$  = 8.33 (s, 1H), 7.86 (s, 2H).

**<sup>13</sup>C NMR (151 MHz, DMSO-*d*<sub>6</sub>)**  $\delta$  = 144.8, 124.3, 116.6.

The spectroscopic data closely match the ones previously reported in the literature [13].

#### 5-Methoxy-1H-benzo[d]imidazole **4i**

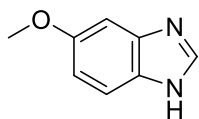

The title compound was synthesized according to the general procedure **C. 2i** (168.15 mg, 1.00 mmol), NaOH (239.98 mg, 6.00 mmol), **1** (324.36 mg, 3.00 mmol), and 250  $\mu$ L of distilled water were used. After that, **1** (324.36 mg, 3.00 mmol) and 60  $\mu$ L of distilled water were added. Lastly, an additional silica pad was made to afford **4i** as a reddish solid (100.76 mg, 0.68 mmol, 68%).

**<sup>1</sup>H NMR (600 MHz, DMSO-*d*<sub>6</sub>)**  $\delta$  = 8.10 (d, *J* = 5.1 Hz, 1H), 7.47 (dd, *J* = 8.7, 2.7 Hz, 1H), 7.08 (t, *J* = 2.9 Hz, 1H), 6.81 (dd, *J* = 8.7, 2.7 Hz, 1H), 3.77 (s, 3H).

**<sup>13</sup>C NMR (151 MHz, DMSO-*d*<sub>6</sub>)**  $\delta$  = 155.6, 141.5, 116.4, 111.4, 97.5, 55.4.

The spectroscopic data closely match the ones previously reported in the literature [11].

#### 5-(Trifluoromethoxy)-1H-benzo[d]imidazole **4j**

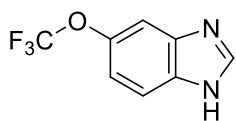

The title compound was synthesized according to the general procedure **C. 2j** (222.12 mg, 1.00 mmol), NaOH (239.98 mg, 6.00 mmol), **1** (324.36 mg, 3.00 mmol), and 250  $\mu$ L of distilled water were used. After that, **1** (324.36 mg, 3.00 mmol) and 60  $\mu$ L of distilled water were added. Lastly, an additional silica pad was made to afford **4j** as a brownish solid (185.97 mg, 0.92 mmol, 92%).

**<sup>1</sup>H NMR (600 MHz, DMSO-*d*<sub>6</sub>)**  $\delta$  = 12.69 (s, 1H), 8.34 (s, 1H), 7.67 (d, *J* = 8.7 Hz, 1H), 7.59 (d, *J* = 2.3 Hz, 1H), 7.18 (dd, *J* = 8.7, 2.3 Hz, 1H).

**<sup>13</sup>C NMR (151 MHz, DMSO-*d*<sub>6</sub>)**  $\delta$  = 144.2, 143.6, 122.9, 121.3, 119.6, 115.6.

The spectroscopic data closely match the ones previously reported in the literature [14].

### 1H-Benzo[d]imidazol-5-amine **4k**

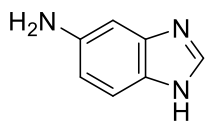

The title compound was synthesized according to the general procedure **C**. **2k** (153.14 mg, 1.00 mmol), NaOH (239.98 mg, 6.00 mmol), **1** (324.36 mg, 3.00 mmol), and 250  $\mu$ L of distilled water were used. After that, **1** (324.36 mg, 3.00 mmol) and 60  $\mu$ L of distilled water were added. Lastly, an additional silica pad was made to afford **4k** as a brownish solid (59.9 mg, 0.45 mmol, 45%).

**<sup>1</sup>H NMR (600 MHz, DMSO-*d*<sub>6</sub>)**  $\delta$  = 7.85 (s, 1H), 7.24 (d, *J* = 8.5 Hz, 1H), 6.66 (s, 1H), 6.56 (s, 2H), 6.51 (dd, *J* = 8.5, 2.1 Hz, 1H).

**<sup>13</sup>C NMR (151 MHz, DMSO-*d*<sub>6</sub>)**  $\delta$  = 144.6, 139.1, 134.6, 118.9, 111.3, 94.8.

The spectroscopic data closely match the ones previously reported in the literature [10].

### 1H-Benzo[d]imidazole-5-carbonitrile **4l**

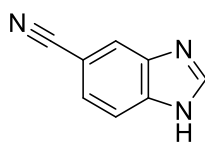

The title compound was synthesized according to the general procedure **B**. **3l** (133.15 mg, 1.00 mmol), **1** (324.36 mg, 3.00 mmol), and 200  $\mu$ L of distilled water were used. Lastly, an additional silica pad was made to afford **4l** as a brownish solid (35.79 mg, 0.25 mmol, 25%).

**<sup>1</sup>H NMR (600 MHz, DMSO-*d*<sub>6</sub>)**  $\delta$  = 8.46 (s, 1H), 8.15 (m, 1H), 7.75 (dd, *J* = 8.3, 0.7 Hz, 1H), 7.58 (dd, *J* = 8.3, 1.5 Hz, 1H).

**<sup>13</sup>C NMR (151 MHz, DMSO-*d*<sub>6</sub>)**  $\delta$  = 145.3, 125.3, 121.4, 120.0, 116.0, 103.8.

The spectroscopic data closely match the ones previously reported in the literature [15].

### 5-Nitro-1H-benzo[d]imidazole **4m**

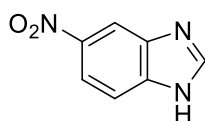

The title compound was synthesized according to the general procedure **B**. **3m** (153.14 mg, 1.00 mmol), **1** (324.36 mg, 3.00 mmol), and 200  $\mu$ L of distilled water were used. Lastly, an additional silica pad was made to afford **4m** as a brownish solid (16.31 mg, 0.10 mmol, 10%).

**<sup>1</sup>H NMR (600 MHz, DMSO-*d*<sub>6</sub>)**  $\delta$  = 8.54 (s, 1H), 8.50 (t, *J* = 1.7 Hz, 1H), 8.11 – 8.09 (m, 1H), 7.76 (dd, *J* = 8.8, 1.3 Hz, 1H).

**<sup>13</sup>C NMR (151 MHz, DMSO-*d*<sub>6</sub>)**  $\delta$  = 146.8, 142.7, 117.6, 115.0, 112.8.

The spectroscopic data closely match the ones previously reported in the literature [10].

### 1-Phenyl-1H-benzo[d]imidazole **4n**

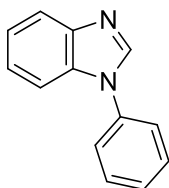

The title compound was synthesized according to the general procedure **B**. **3n** (184.24 mg, 1.00 mmol), **1** (324.36 mg, 3.00 mmol), and 200  $\mu$ L of distilled water were used. Lastly, an additional silica pad was made to afford **4n** as a pink solid (23.31 mg, 0.12 mmol, 12%).

**<sup>1</sup>H NMR (600 MHz, DMSO-*d*<sub>6</sub>)**  $\delta$  = 8.55 (s, 1H), 7.82 – 7.76 (m, 1H), 7.67 – 7.63 (m, 2H), 7.62 – 7.56 (m, 3H), 7.49 – 7.45 (m, 1H), 7.33 – 7.28 (m, 2H).

**<sup>13</sup>C NMR (151 MHz, DMSO-*d*<sub>6</sub>)**  $\delta$  = 143.9, 143.3, 136.0, 133.1, 130.1, 127.8, 123.7, 123.5, 122.5, 120.0, 110.7.

The spectroscopic data closely match the ones previously reported in the literature [11].

### 3H-Imidazo[4,5-*b*]pyridine **4o**

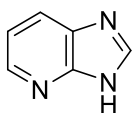

The title compound was synthesized according to the general procedure **C**. **2o** (139.11 mg, 1.00 mmol), NaOH (239.98 mg, 6.00 mmol), **1** (324.36 mg, 3.00 mmol), and 250  $\mu$ L of distilled water were used. After that, **1** (324.36 mg, 3.00 mmol) and 60  $\mu$ L of distilled water were added. Lastly, an additional silica pad was made to afford **4o** as a white solid (66.71 mg, 0.56 mmol, 56%).

**<sup>1</sup>H NMR (600 MHz, DMSO-*d*<sub>6</sub>)**  $\delta$  = 12.95 (bs, 1H), 8.52 – 8.29 (m, 2H), 8.01 (d, *J* = 8.1 Hz, 1H), 7.23 (dd, *J* = 8.0, 4.7 Hz, 1H).

**<sup>13</sup>C NMR (151 MHz, DMSO-*d*<sub>6</sub>)**  $\delta$  = 143.9, 143.7, 139.6, 117.8, 116.6, 114.4.

The spectroscopic data closely match the ones previously reported in the literature [14].

### 6-Bromo-3H-imidazo[4,5-*b*]pyridine **4q**

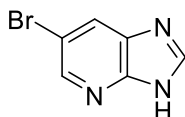

The title compound was synthesized according to the general procedure **B**. **3n** (188.03 mg, 1.00 mmol), **1** (324.36 mg, 3.00 mmol), and 200  $\mu$ L of distilled water were used. Lastly, an additional silica pad was made to afford **4n** as a pink solid (21.78 mg, 0.11 mmol, 11%).

**<sup>1</sup>H NMR (600 MHz, DMSO-*d*<sub>6</sub>)**  $\delta$  = 8.48 (s, 1H), 8.43 (d, *J* = 2.2 Hz, 1H), 8.29 (d, *J* = 2.2 Hz, 1H).

**<sup>13</sup>C NMR (151 MHz, DMSO-*d*<sub>6</sub>)**  $\delta$  = 146.0, 144.6, 126.7, 113.2.

The spectroscopic data closely match the ones previously reported in the literature [16].

### 1H-Perimidine **4r**

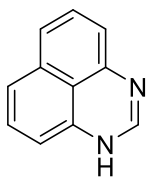

The title compound was synthesized according to the general procedure **B**. **3r** (158.20 mg, 1.00 mmol), **1** (324.36 mg, 3.00 mmol), and 200  $\mu$ L of distilled water were used. Lastly, an additional silica pad was made to afford **4r** as a purple solid (100.92 mg, 0.60 mmol, 60%).

**$^1\text{H}$  NMR (600 MHz, DMSO- $d_6$ )**  $\delta$  = 7.29 (s, 1H), 7.07 (t,  $J$  = 7.9 Hz, 2H), 6.97 (d,  $J$  = 8.3 Hz, 2H), 6.48 – 6.30 (m, 2H).

**$^{13}\text{C}$  NMR (151 MHz, DMSO- $d_6$ )**  $\delta$  = 146.5, 135.4, 128.4, 123.0, 118.4.

The spectroscopic data closely match the ones previously reported in the literature [17].

### 3. Green Metrics calculations

Calculation of the Green Chemistry Metrics for the Mechanochemical Preparation of **4d**

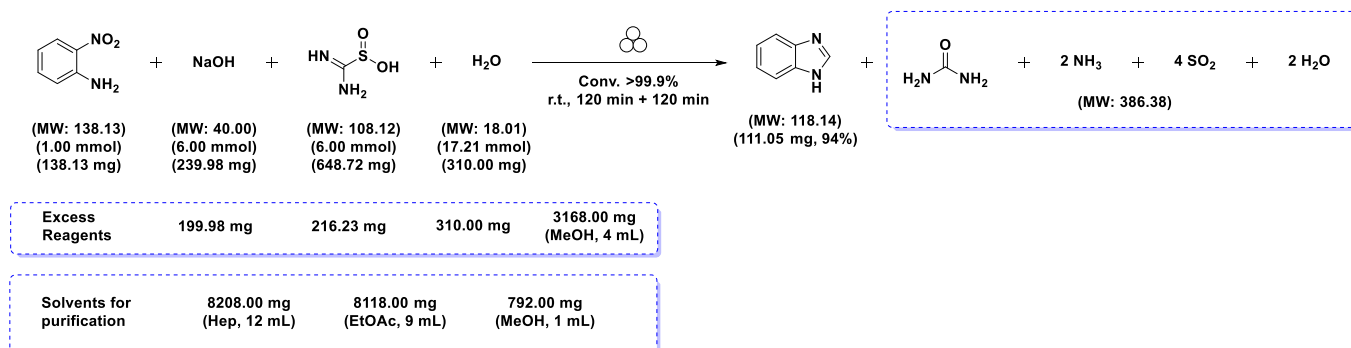

Scheme M1. Mechanochemical preparation of **4d**.

#### Calculation of Green Chemistry Metrics

$$\text{Atom Economy} = \frac{\text{Mass of desired useful product}}{\text{Total Mass of all reactants}} \times 100 = \frac{118.14}{138.13 + 40.00 + 108.12 + 18.01} \times 100 = 38.8\%$$

$$\text{Environmental Factor} = \frac{\text{Mass of total waste}}{\text{Mass of desired product}} = \frac{199.98 + 216.23 + 310.00 + 386.38 + 3168.00 + 17118.00}{111.05} = 192.7$$

$$\text{Reaction Mass Efficiency} = \frac{\text{actual mass of desired product}}{\text{mass of reactants}} \times 100 = \frac{111.05}{138.13 + 239.98 + 648.72 + 310.00} \times 100 = 8.31\%$$

## DOZN™ score for the mechanochemical synthesis of 4d

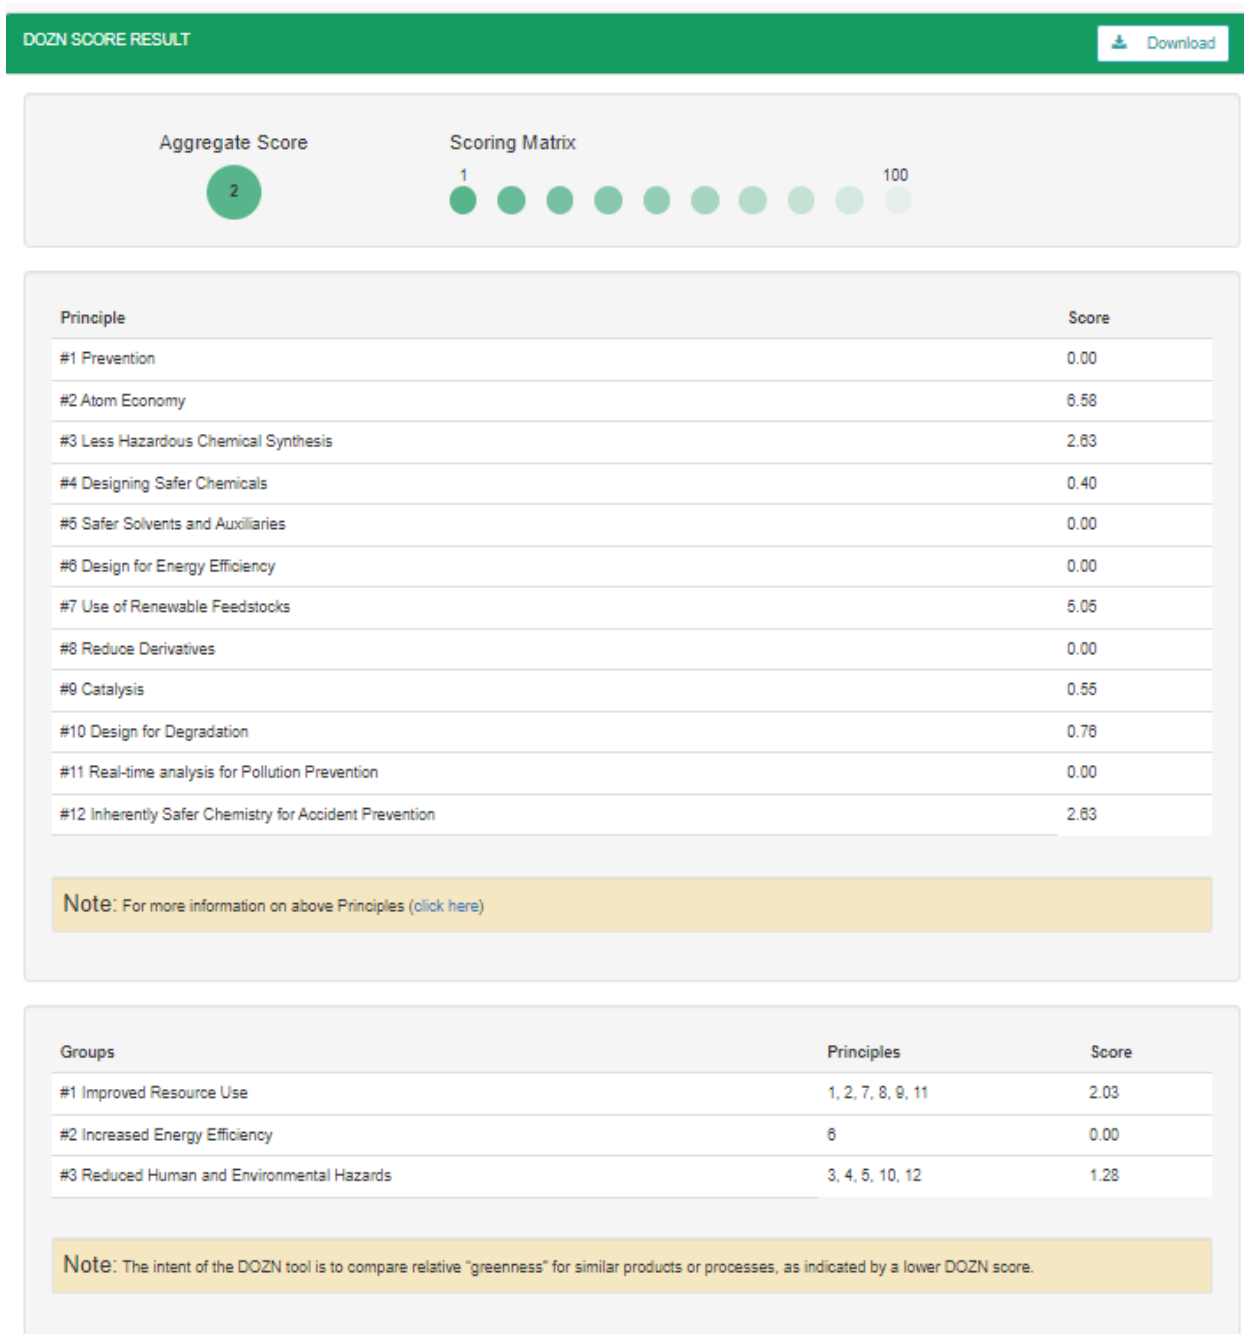

Figure S1

## Calculation of the Green Chemistry Metrics for the microwave preparation of **4d**

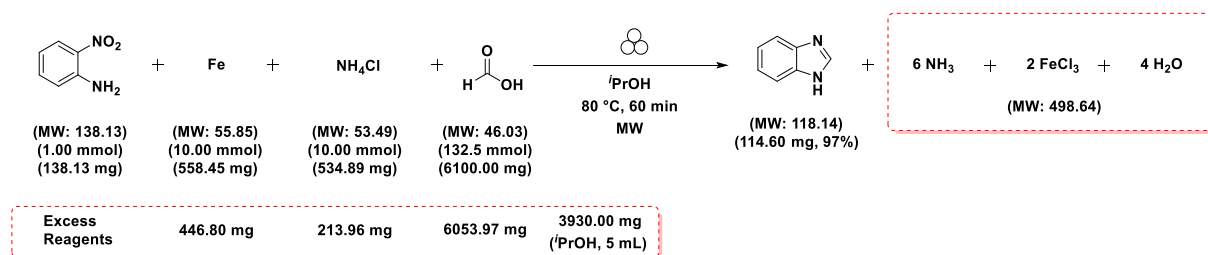

**Scheme M2.** Microwave preparation of benzimidazole **4d** [18].

To the total amount of waste, the following quantities must be added:

- 1) 10 mL of 2-propanol (**7860.00 mg**) used for diluting the reaction mixture at the end of the reaction;
- 2) 20 mL of dichloromethane (**26600.00 mg**) and 5 mL of sat. aq NaHCO<sub>3</sub>. With regards to the quantity of NaHCO<sub>3</sub>, we based our calculations on the solubility of NaHCO<sub>3</sub> in water:

Solubility of NaHCO<sub>3</sub> in water = 96 mg/mL

Quantity of NaHCO<sub>3</sub> in a 5 mL sat. solution = 96 mg/mL \* 5 mL = 480 mg NaHCO<sub>3</sub>

Weight of a 5 mL sat. aq NaHCO<sub>3</sub> = 1,00 mg/mL \* 5 mL + 480 mg NaHCO<sub>3</sub> = **5480 mg**

- 3) 100 mL of dichloromethane (**133000.00 mg**) for extracting the compound from the aqueous phase.
- 4) Quantity of MgSO<sub>4</sub> used for drying the organic mixture (NO DATA). In this case, we postulated it by considering as follows:

The quantity of water that can be found in dichloromethane is generally not higher than the 0.24% of the entire mass considered [19]. So, we assigned the quantity of anhydrous MgSO<sub>4</sub> used based on such data. Herein, we report all the calculi.

$$159600.00 \text{ mg CH}_2\text{Cl}_2 : 100 = X \text{ mg of H}_2\text{O dissolved in 120 mL of CH}_2\text{Cl}_2 : 0.24$$

$$X = 383.04 \text{ mg of H}_2\text{O dissolved in 120 mL of CH}_2\text{Cl}_2$$

Now we estimate the moles of H<sub>2</sub>O dissolved in 120 mL CH<sub>2</sub>Cl<sub>2</sub>.

$$18.00 \text{ mg H}_2\text{O} : 1.00 \text{ mmol} = 383.04 \text{ mg of H}_2\text{O dissolved in 120 mL of CH}_2\text{Cl}_2 : X \text{ mmol of H}_2\text{O dissolved in 120 mL of CH}_2\text{Cl}_2$$

$$X = 21.28 \text{ mmol of H}_2\text{O dissolved in 120 mL of CH}_2\text{Cl}_2$$

Considering the drying capacity of anhydrous MgSO<sub>4</sub> (1 mol of MgSO<sub>4</sub> is able to complex 7 mol of H<sub>2</sub>O [19]), we can then evaluate the mg of anhydrous MgSO<sub>4</sub> necessary for the drying step:

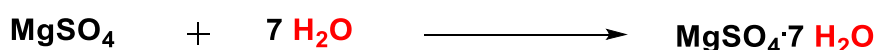



### **Scheme M<sub>3</sub>. MgSO<sub>4</sub> drying ability (CIT.)**

1.00 mmol of MgSO<sub>4</sub> : 7.00 mmol of H<sub>2</sub>O = X mmol of MgSO<sub>4</sub> required : 21.28 mmol of H<sub>2</sub>O  
dissolved in 120 mL of CH<sub>2</sub>Cl<sub>2</sub>

**X= 3.04 mmol of MgSO<sub>4</sub> required**

1.00 mmol of MgSO<sub>4</sub> : 120.37 mg of MgSO<sub>4</sub> = 3.04 mmol of MgSO<sub>4</sub> required : X mg of MgSO<sub>4</sub>  
required

**X= 365.92 mg of MgSO<sub>4</sub> required**

### **Calculation of Green Chemistry Metrics**

$$\text{Atom Economy} = \frac{\text{Mass of desired useful product}}{\text{Total Mass of all reactants}} \times 100 = \frac{118.14}{138.13 + 55.85 + 53.49 + 46.03} \times 100 = 40.3\%$$

$$\text{Environmental Factor} = \frac{\text{Mass of total waste}}{\text{Mass of desired product}}$$

$$\text{EF} = \frac{446.80 + 213.96 + 6053.97 + 3930.00 + 498.64 + 7860 + 26600 + 5480 + 133000 + 365.92}{114.60} = 1609.5$$

$$\text{Reaction Mass Efficiency} = \frac{\text{actual mass of desired product}}{\text{mass of reactants}} \times 100$$

$$\text{RME} = \frac{114.60}{138.13 + 558.45 + 534.89 + 6100} \times 100 = 1.6\%$$

## DOZN™ score for the microwave synthesis of 4d

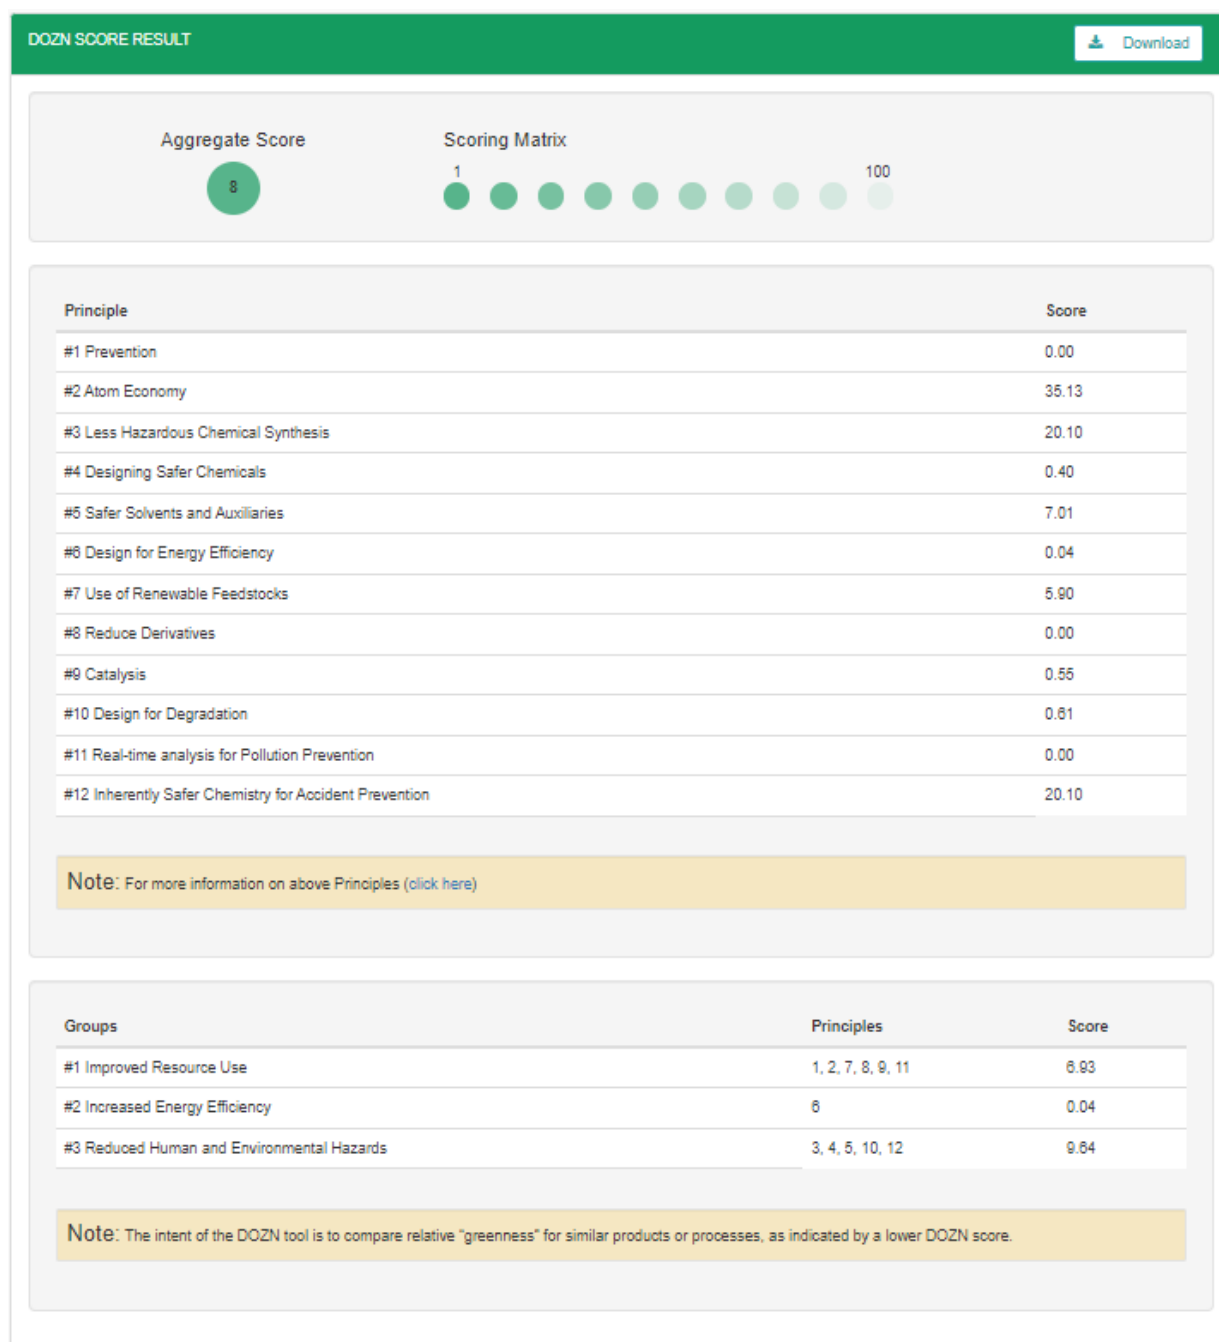

Figure S2

4. Spectra

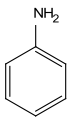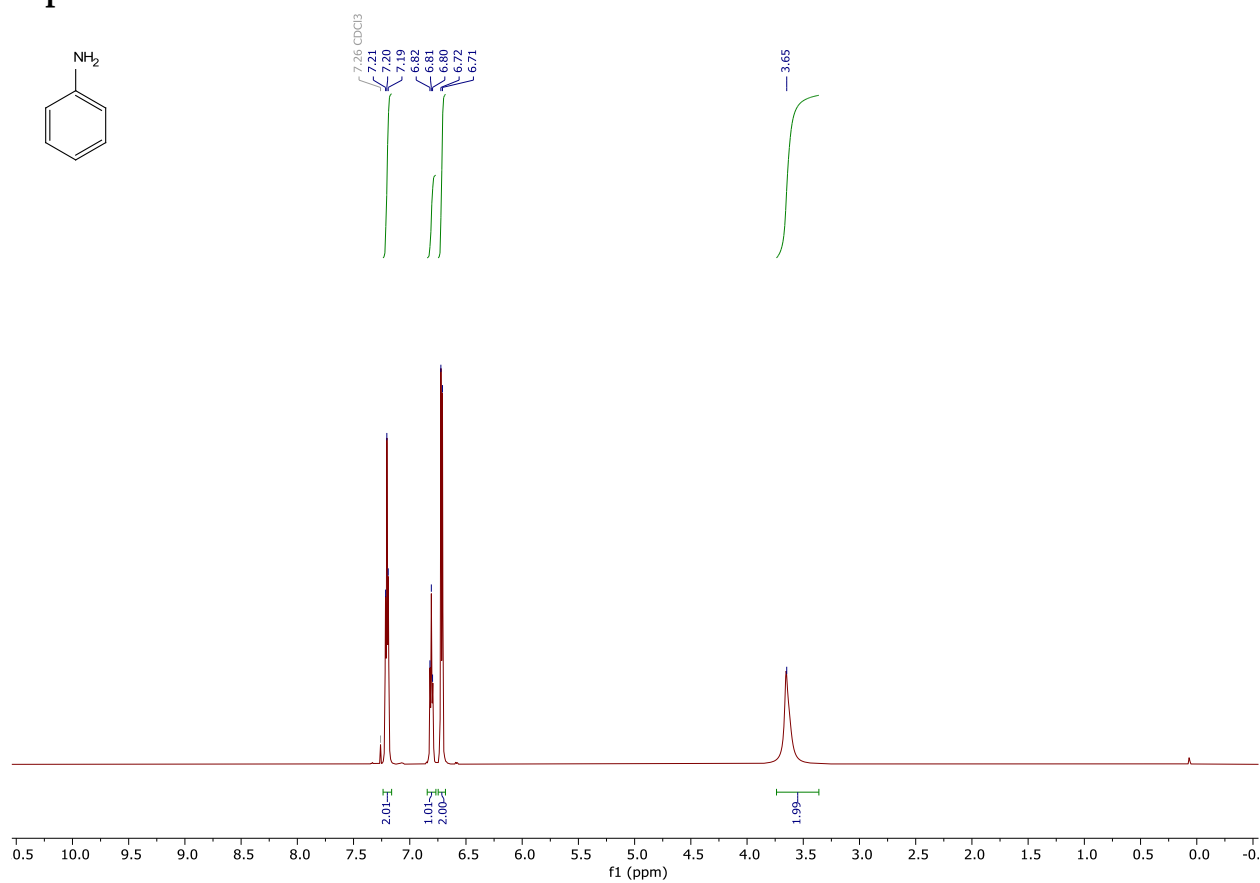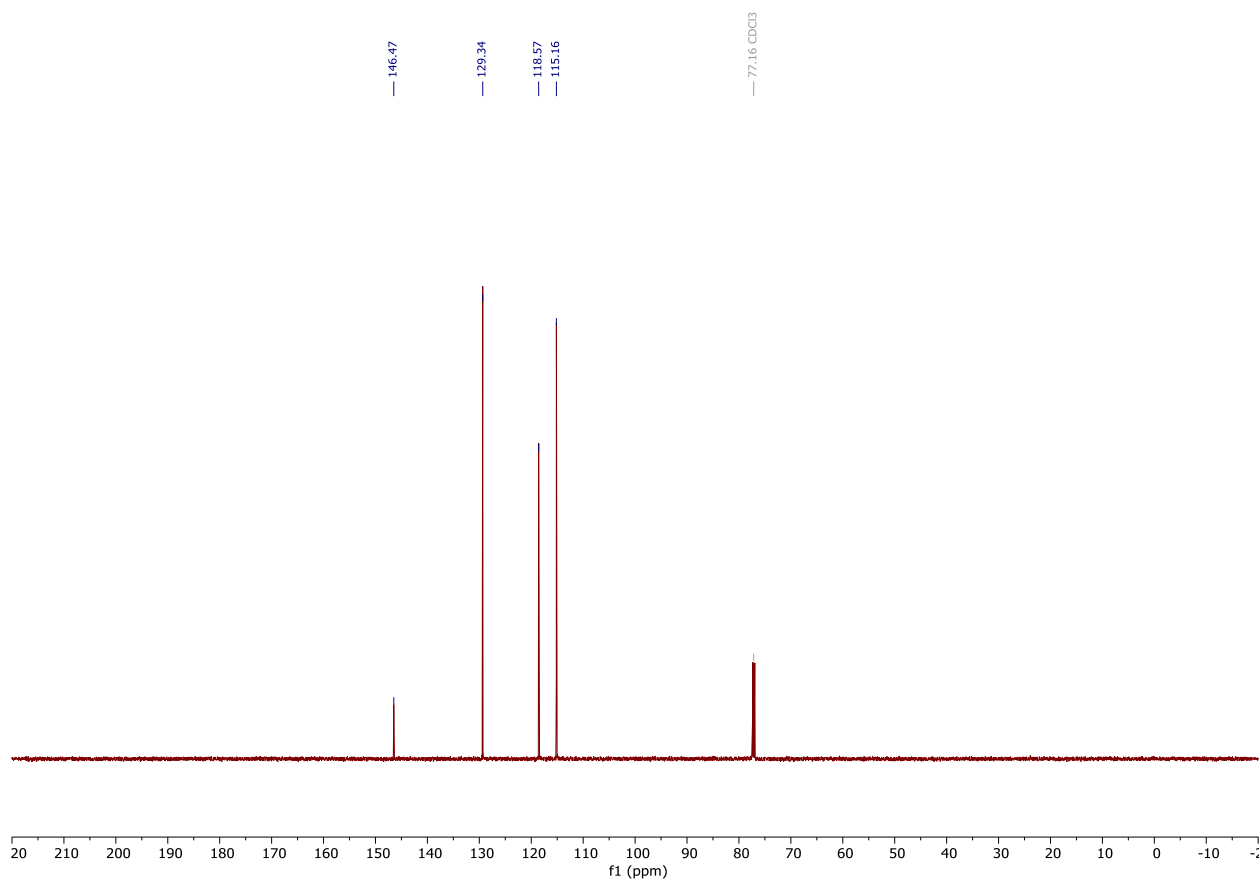

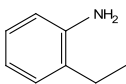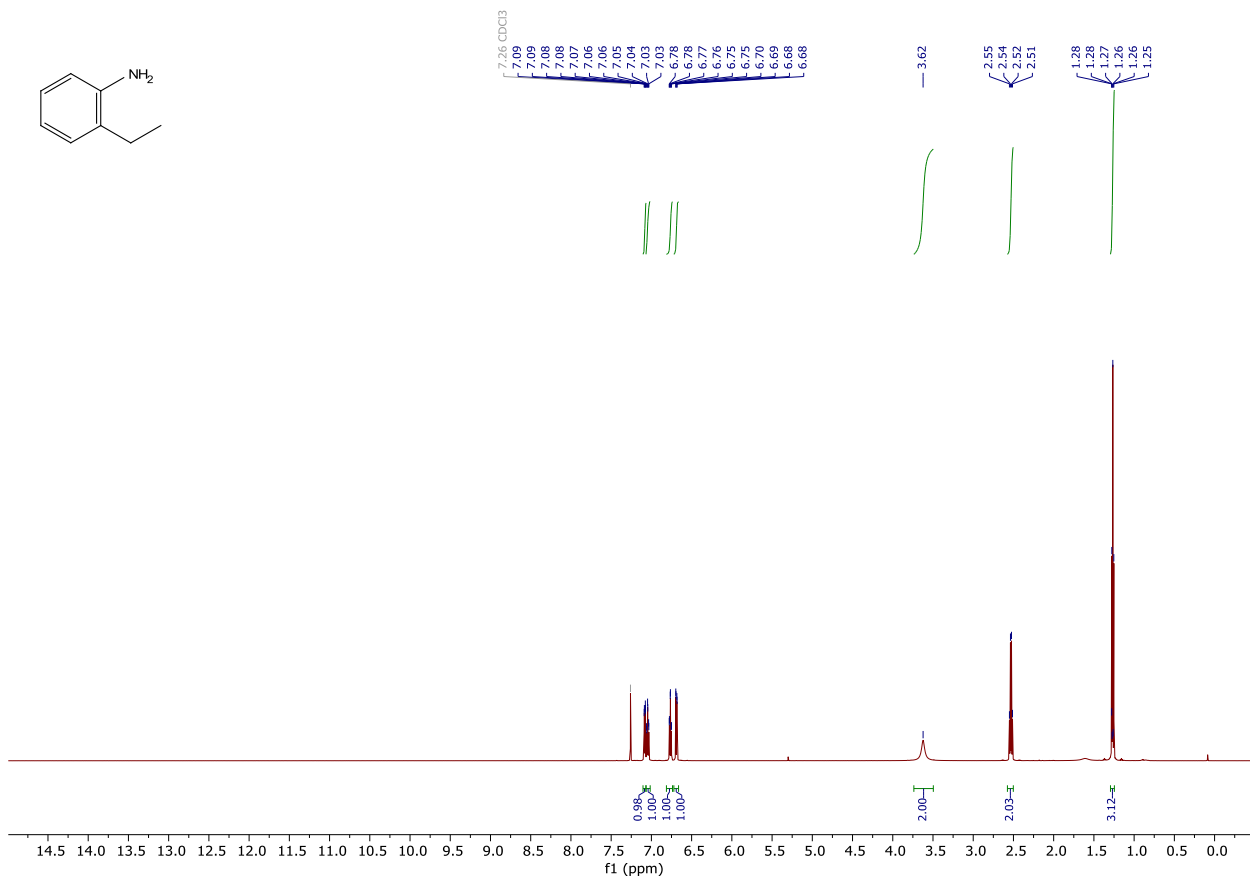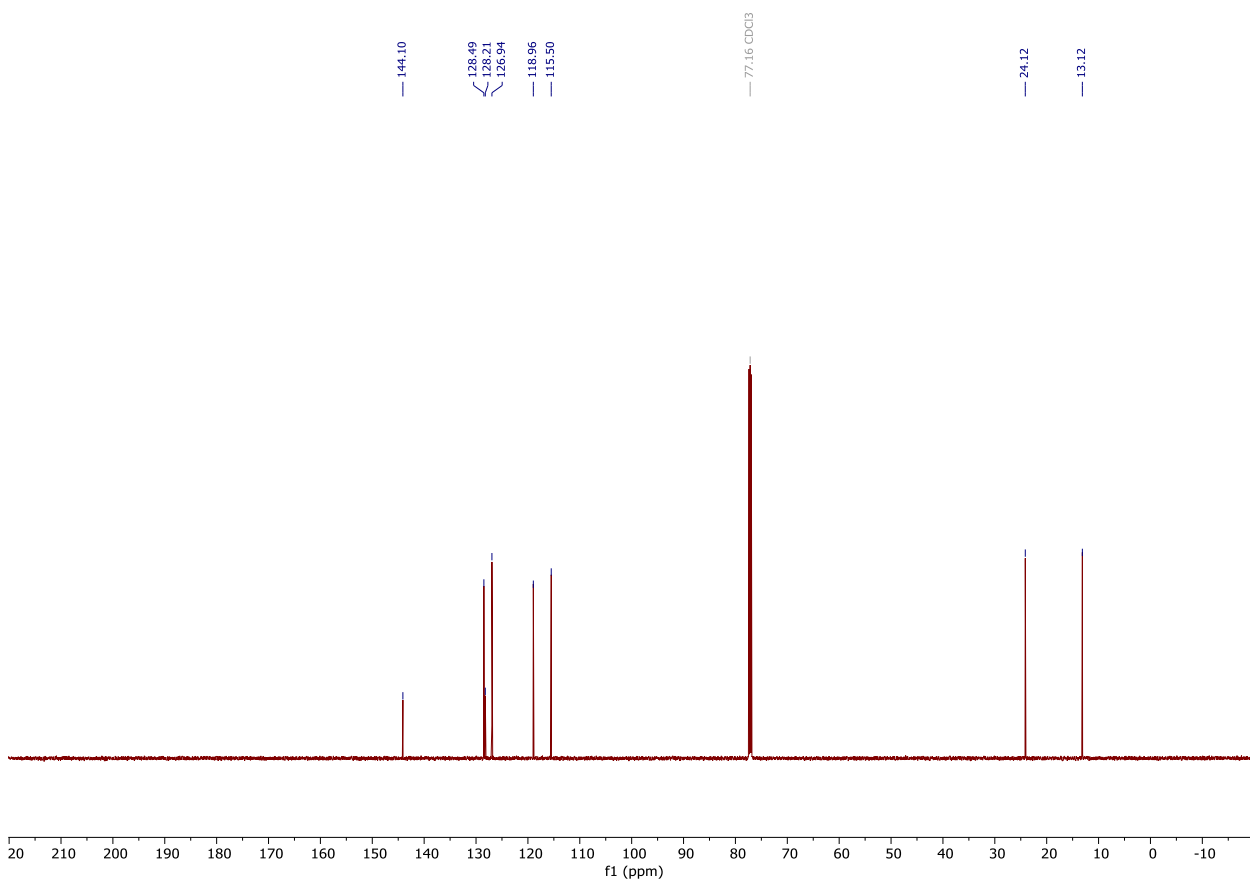

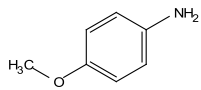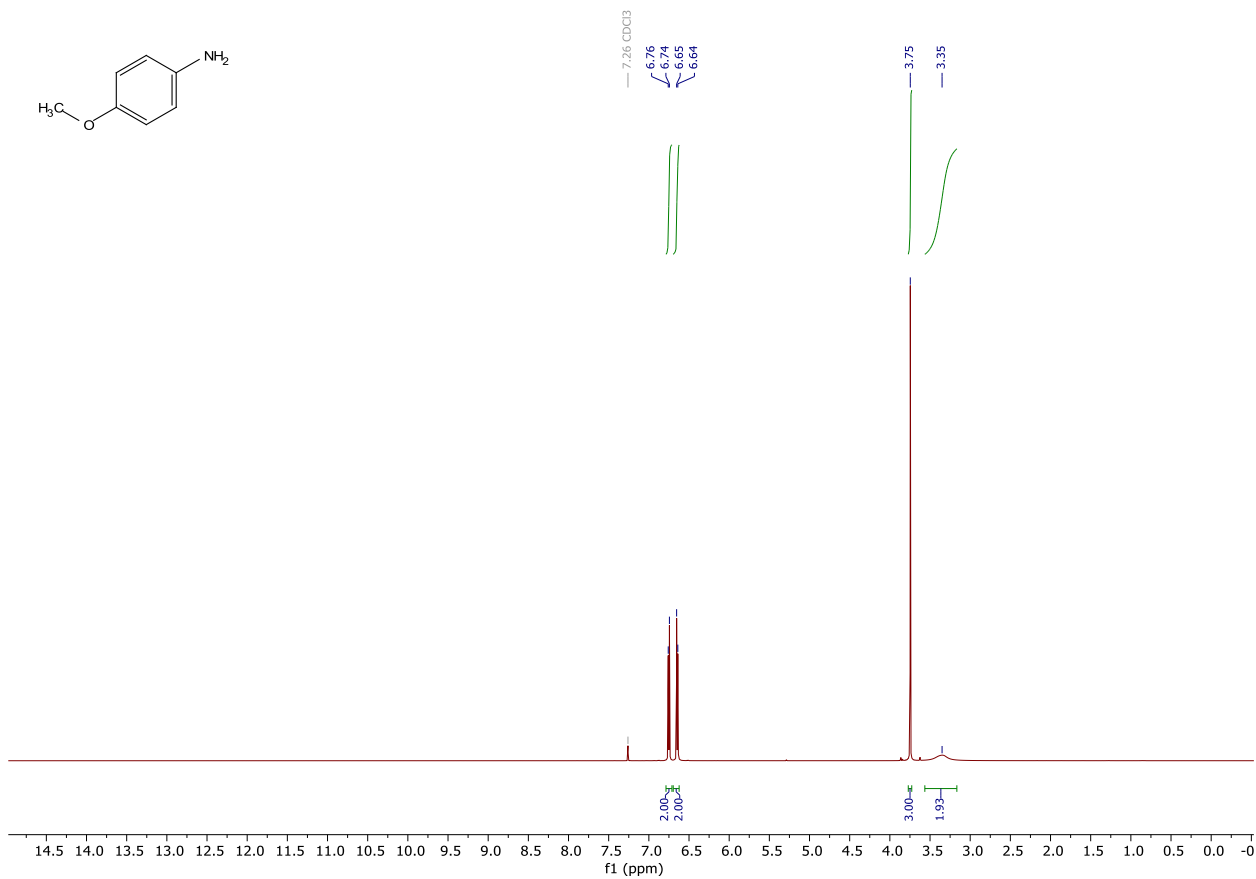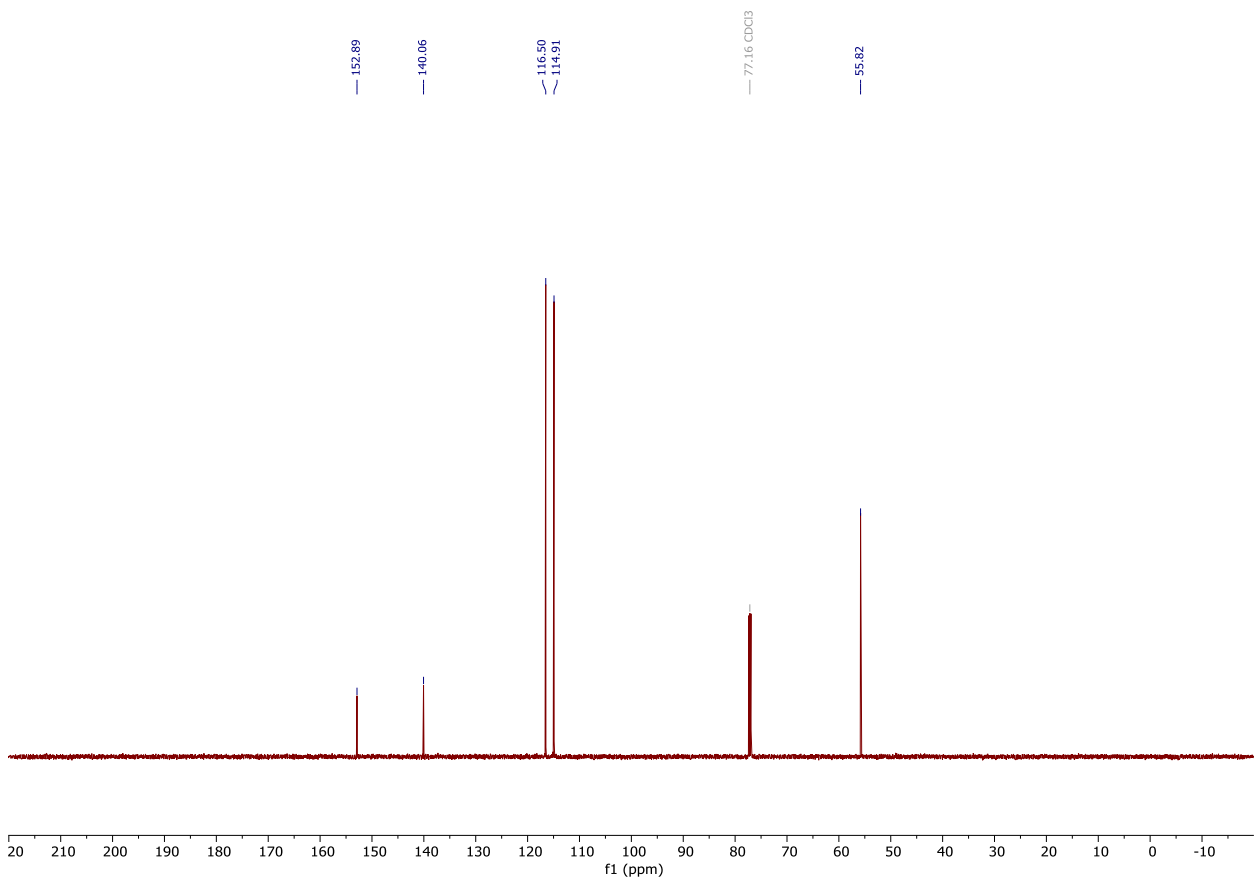

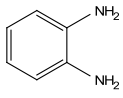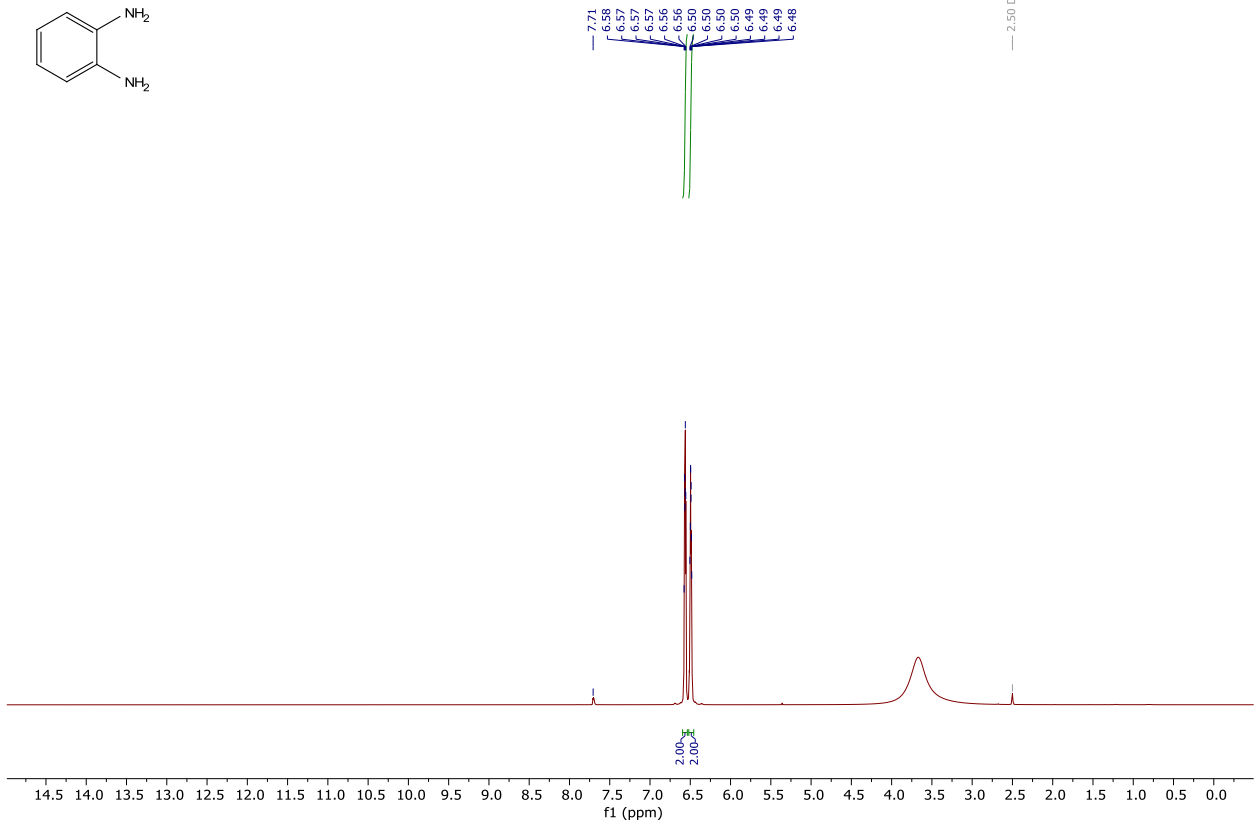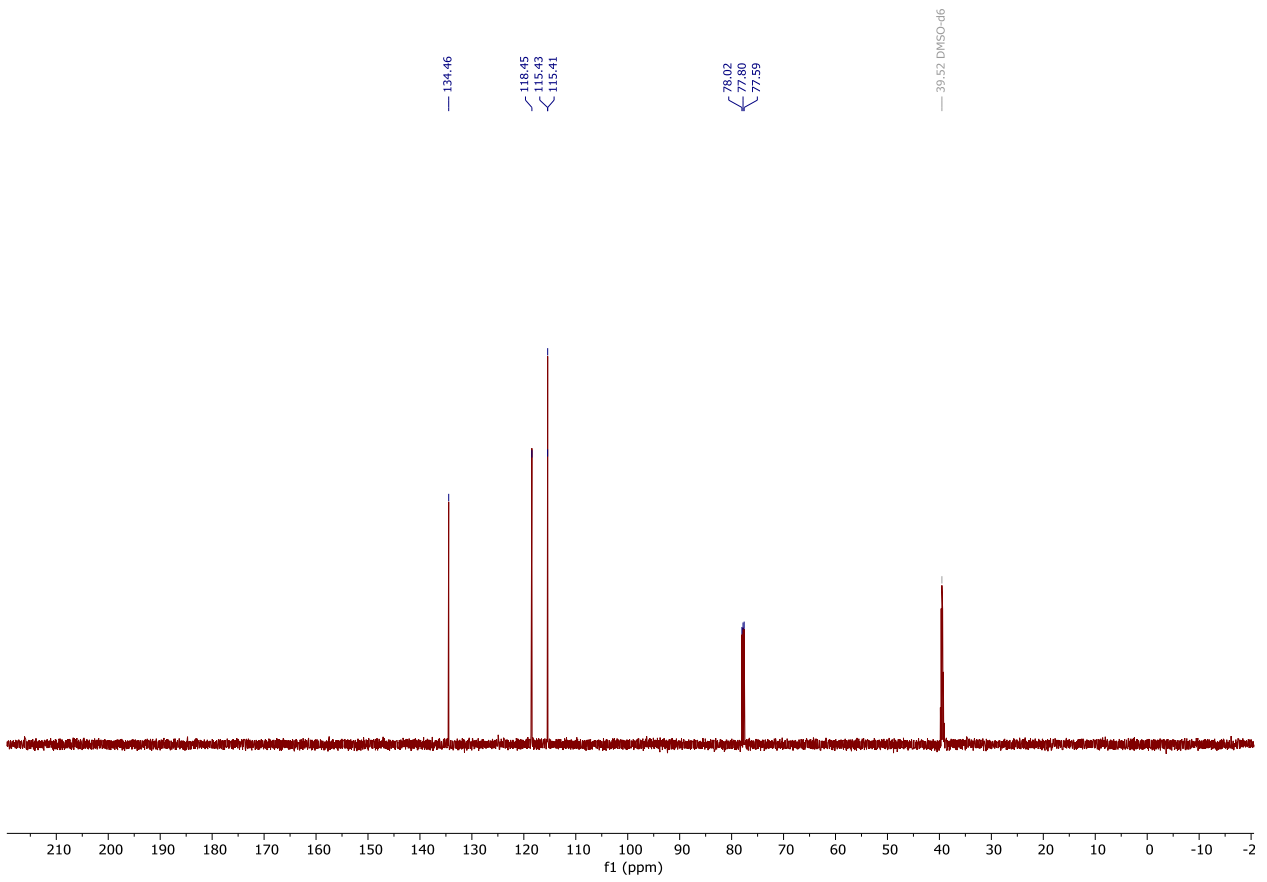

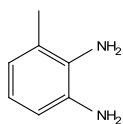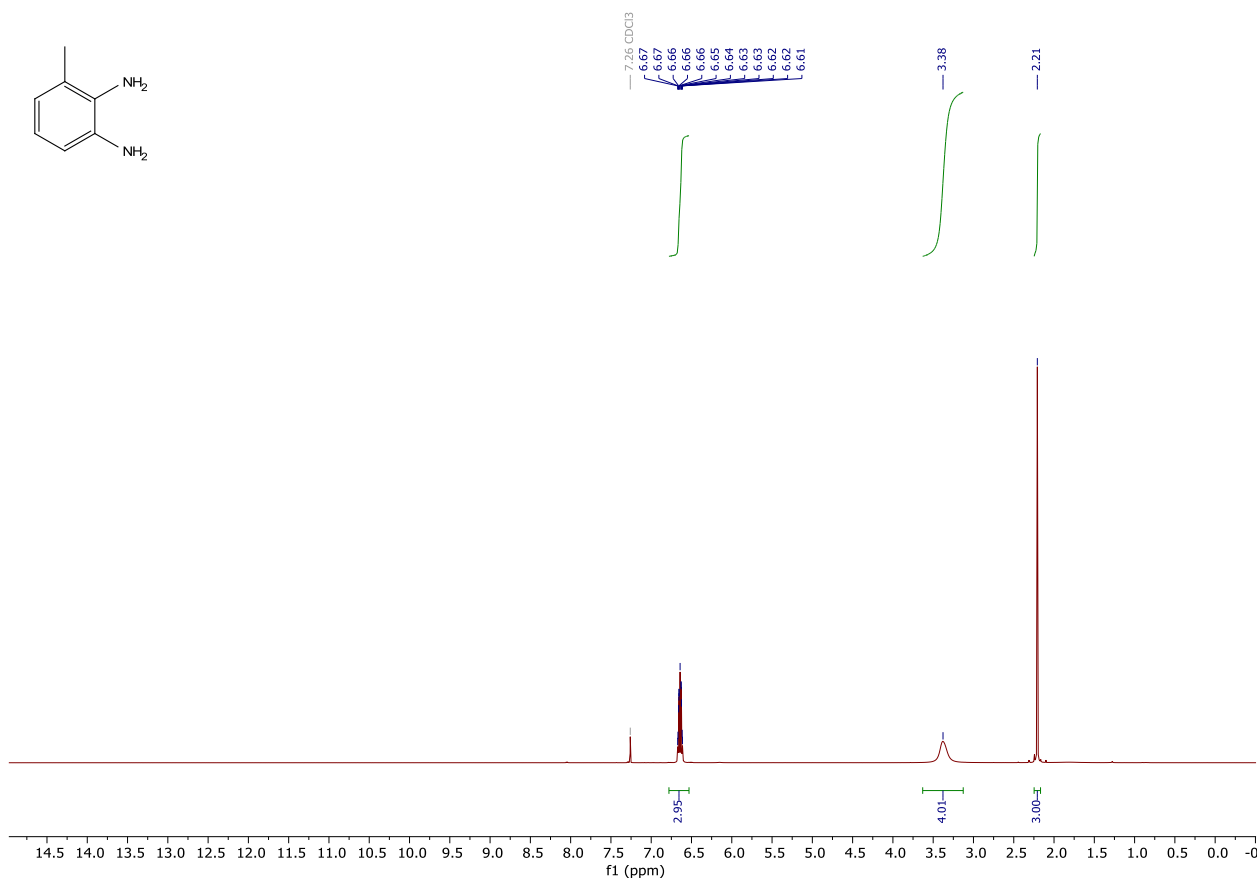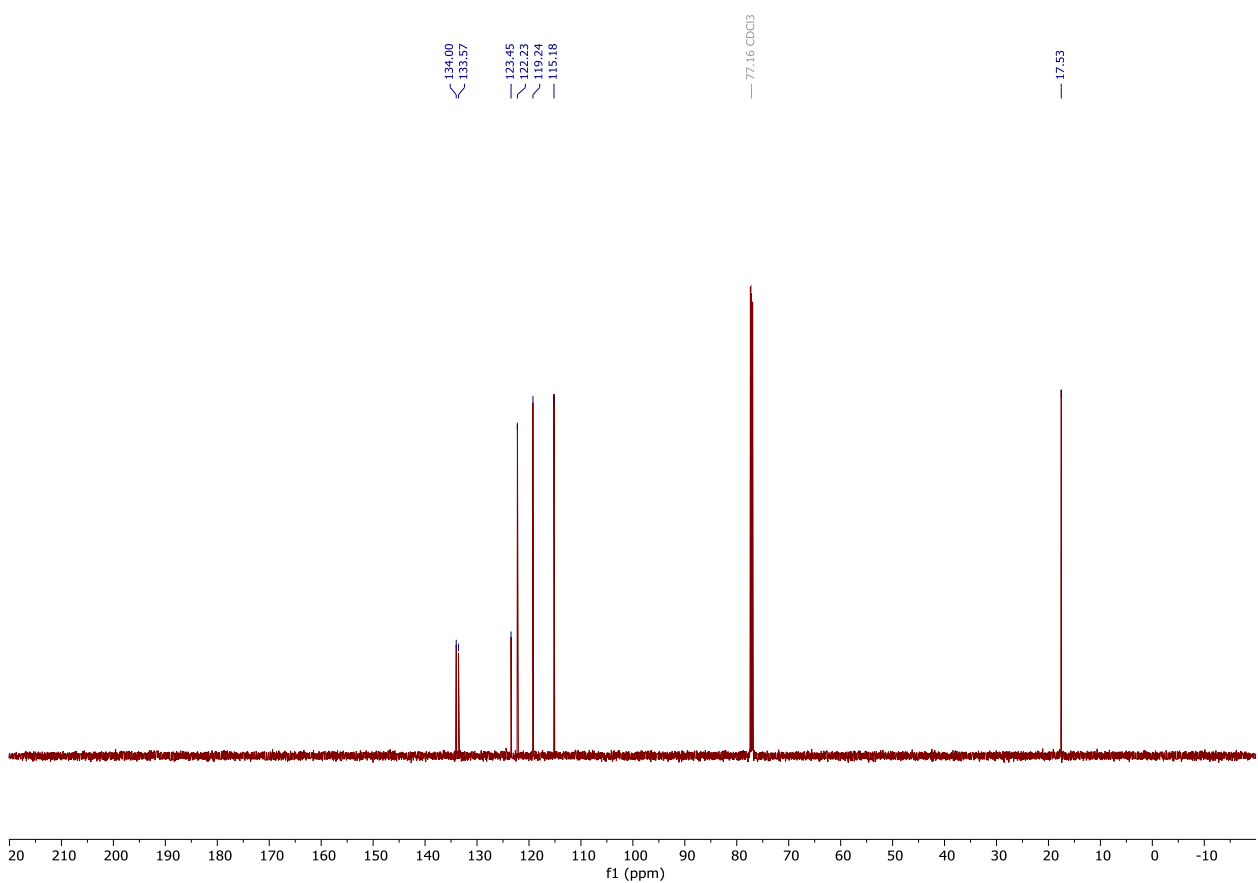

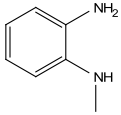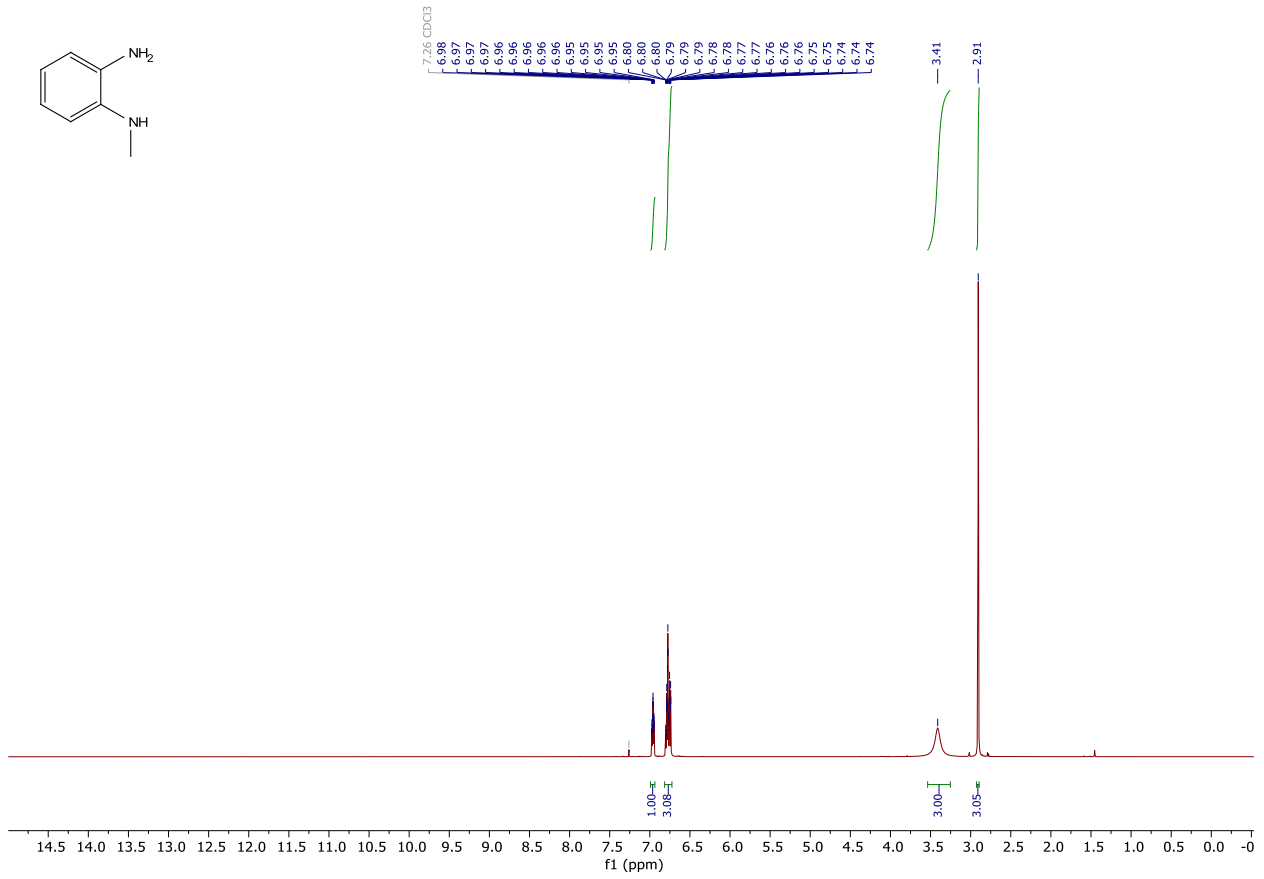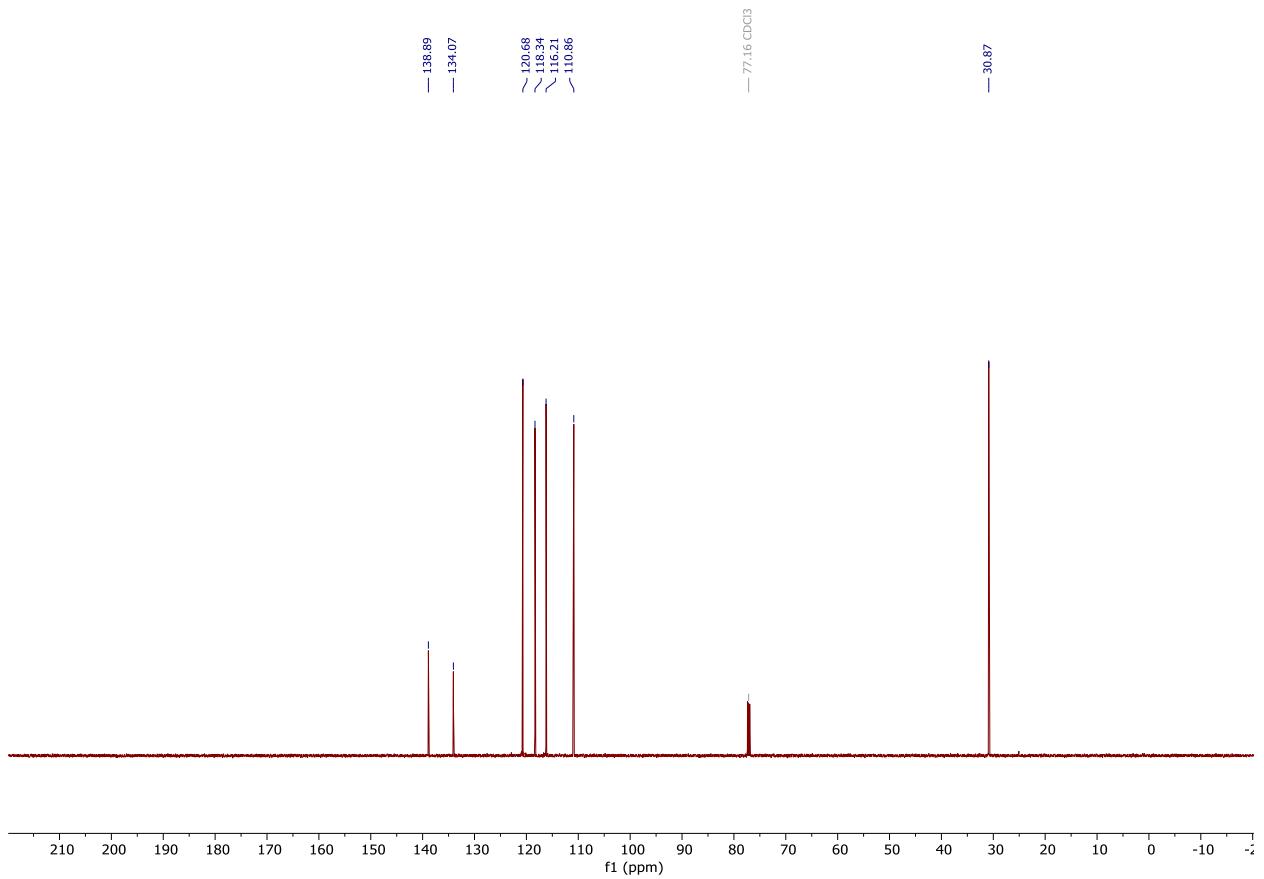



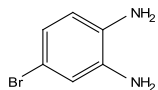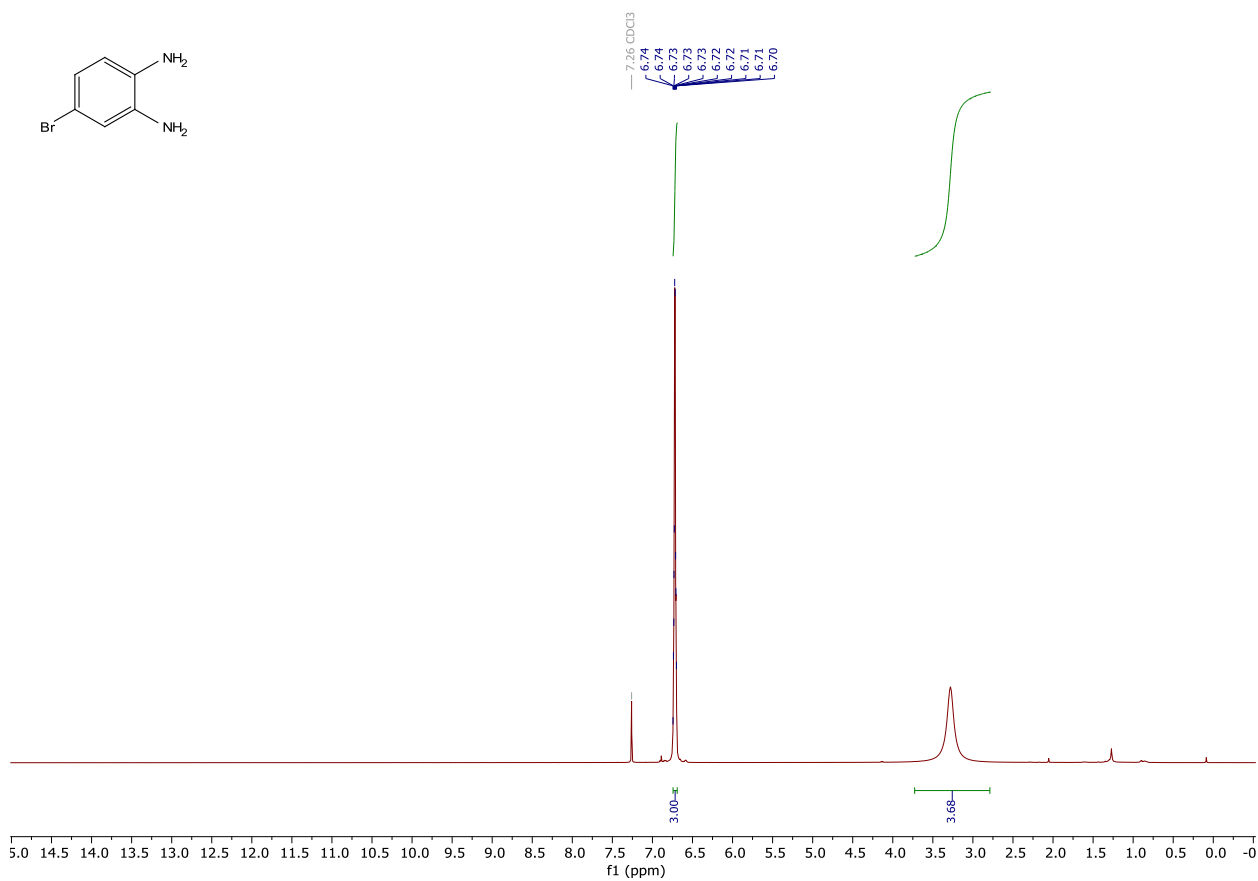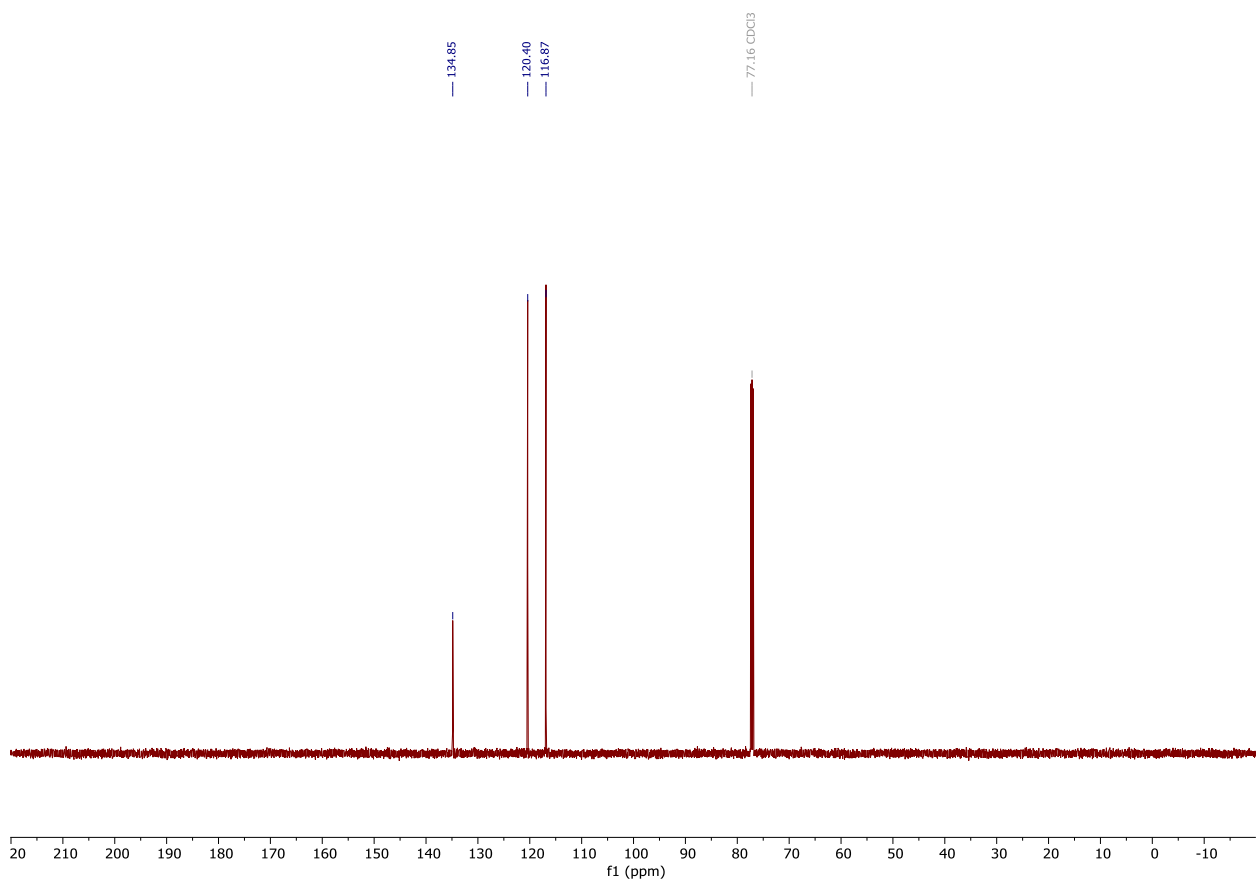

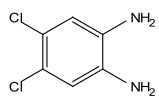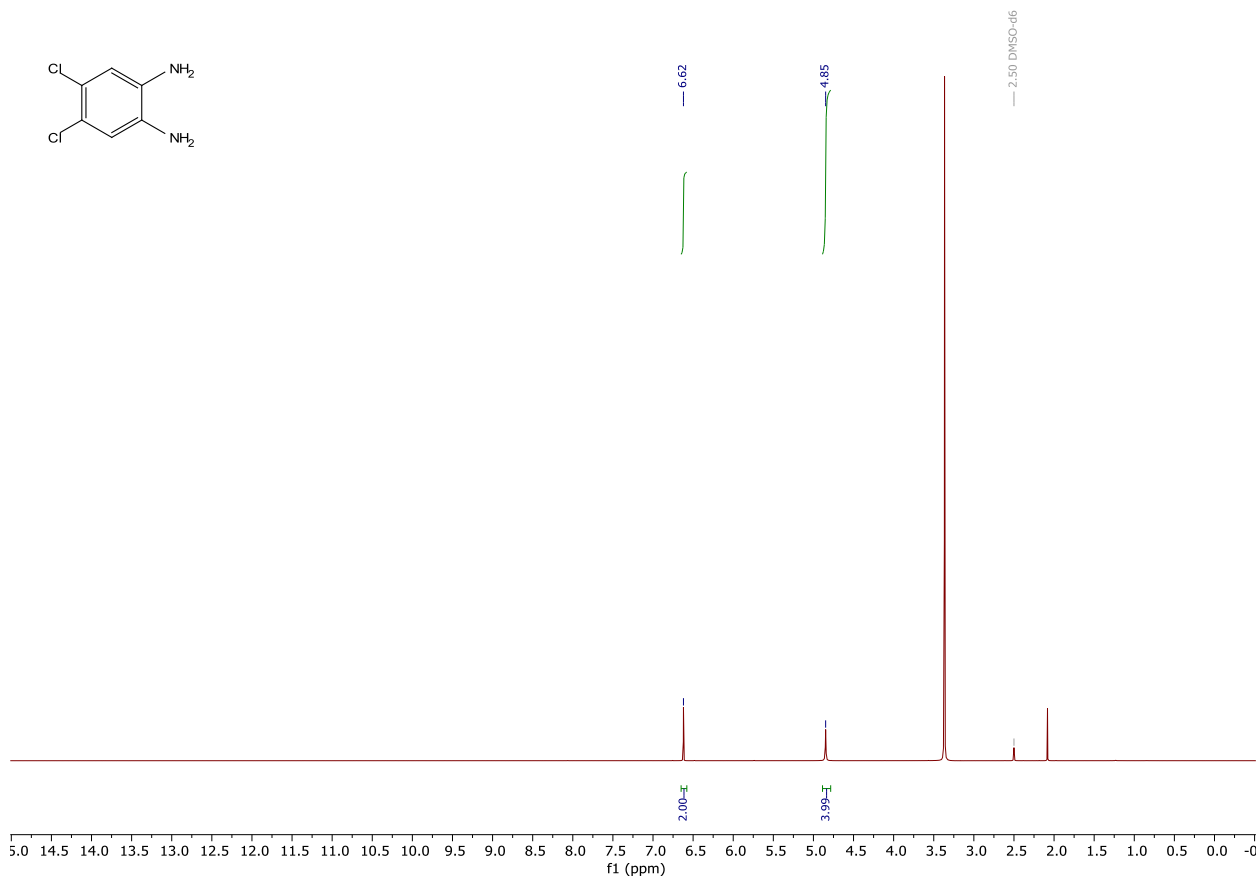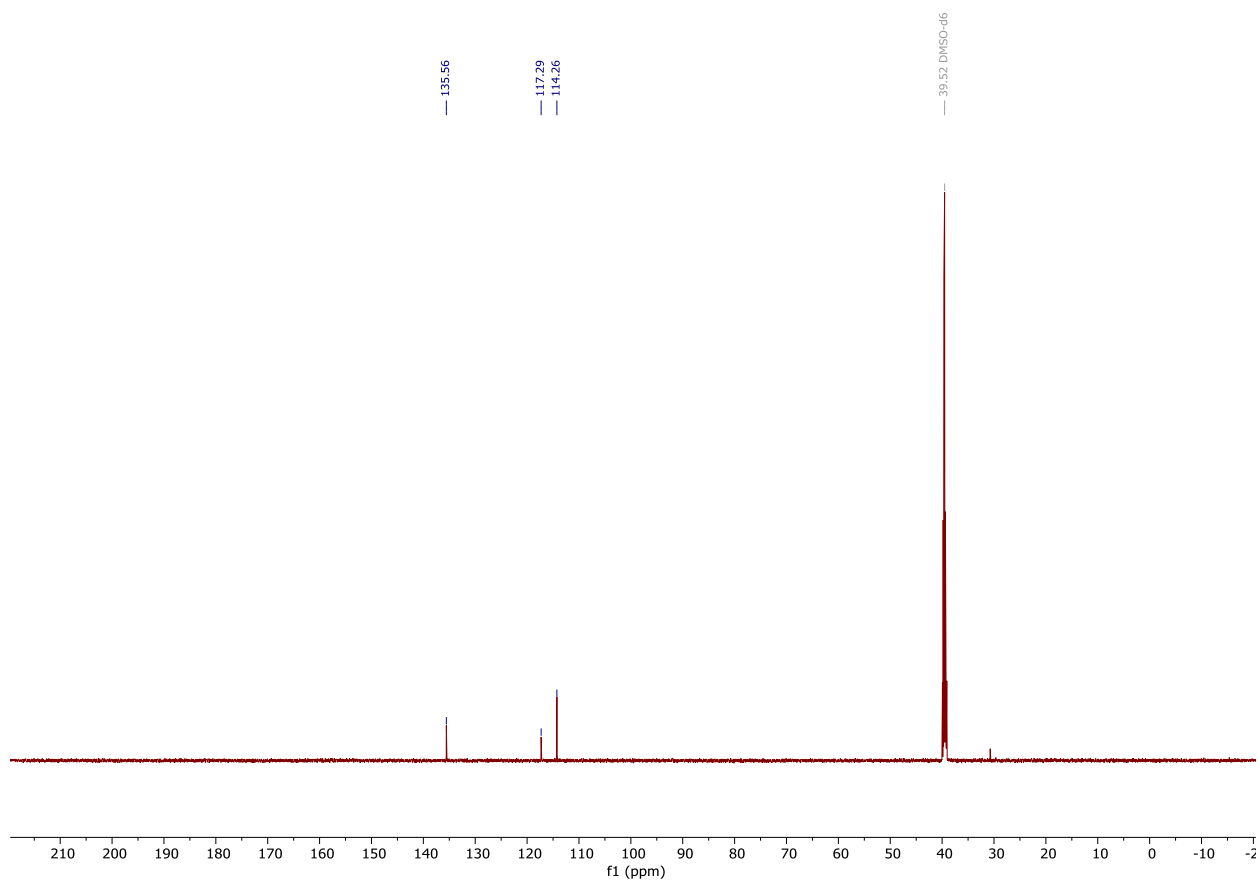

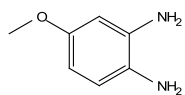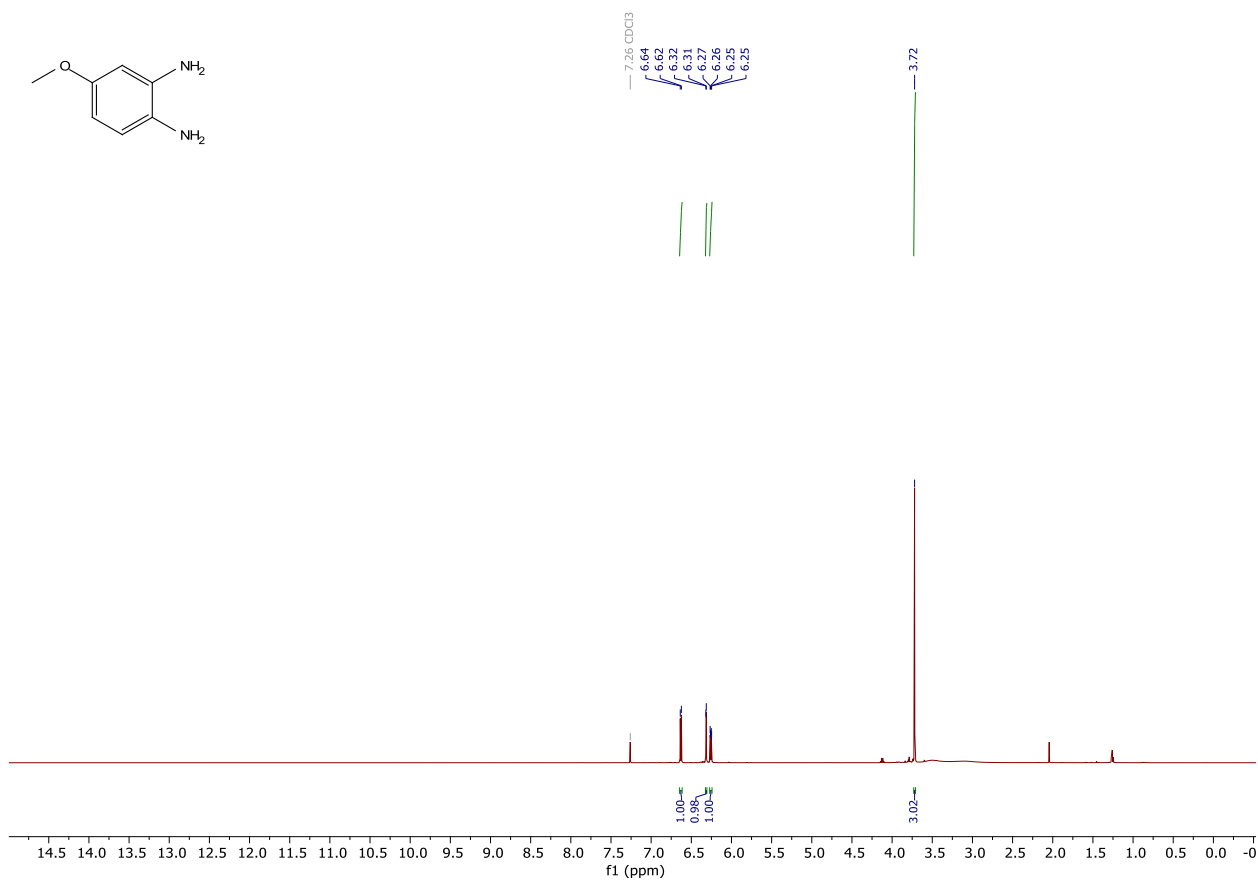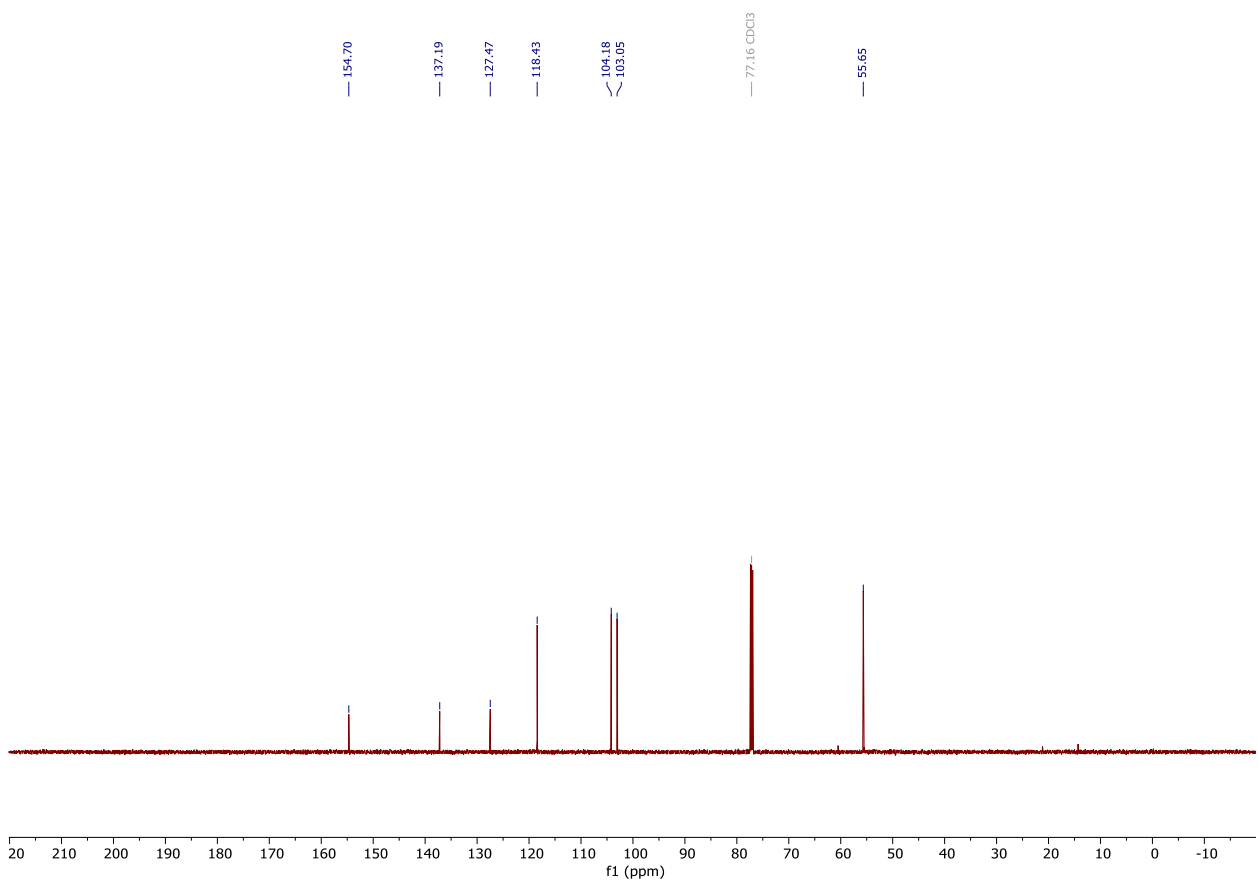

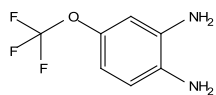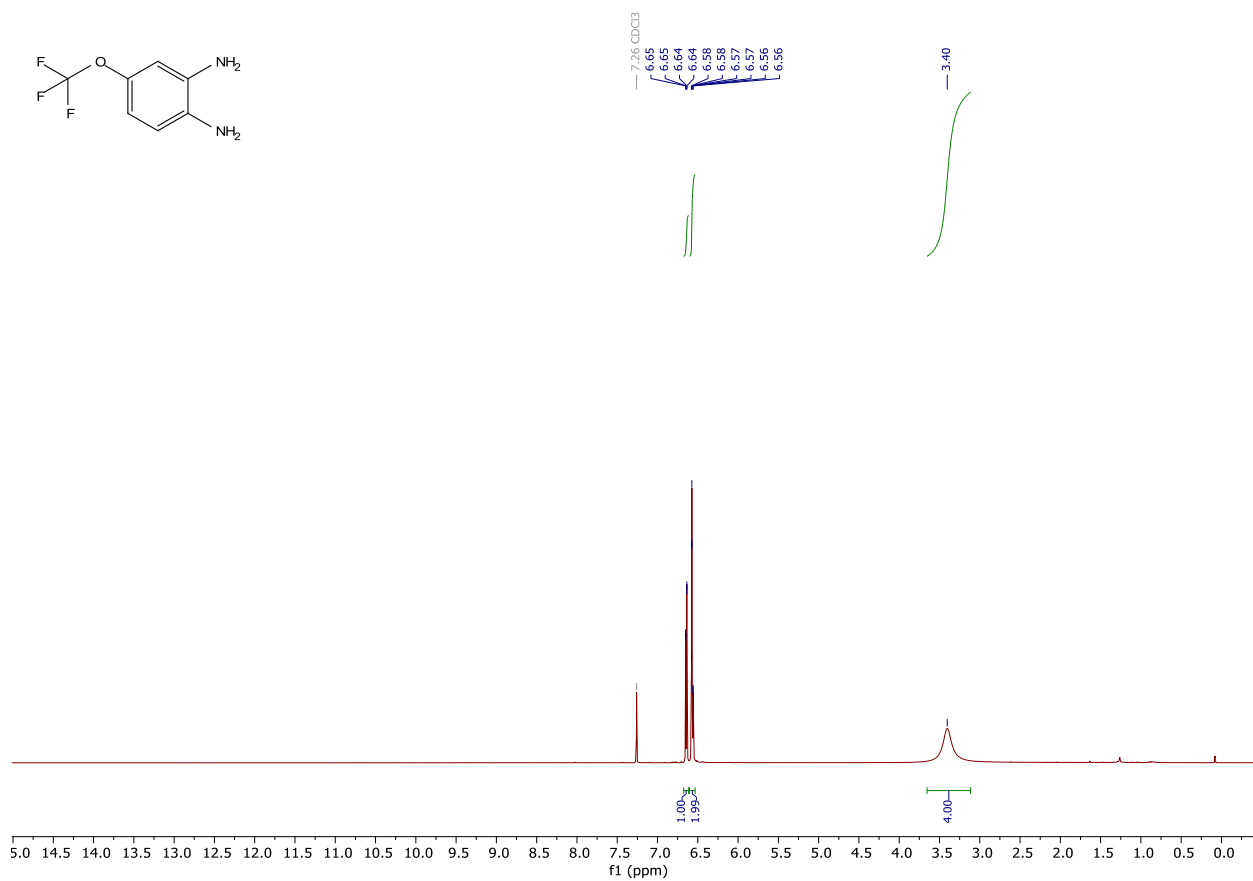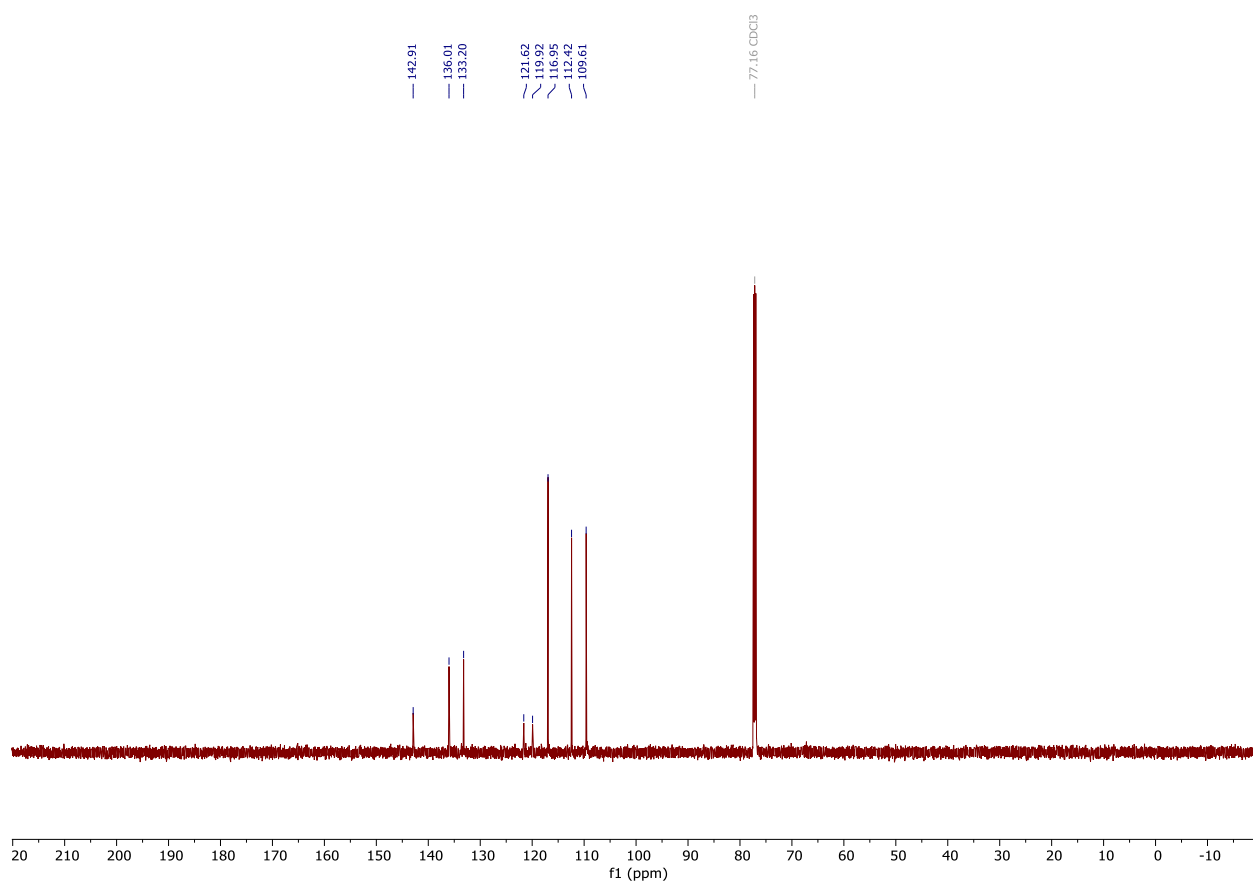

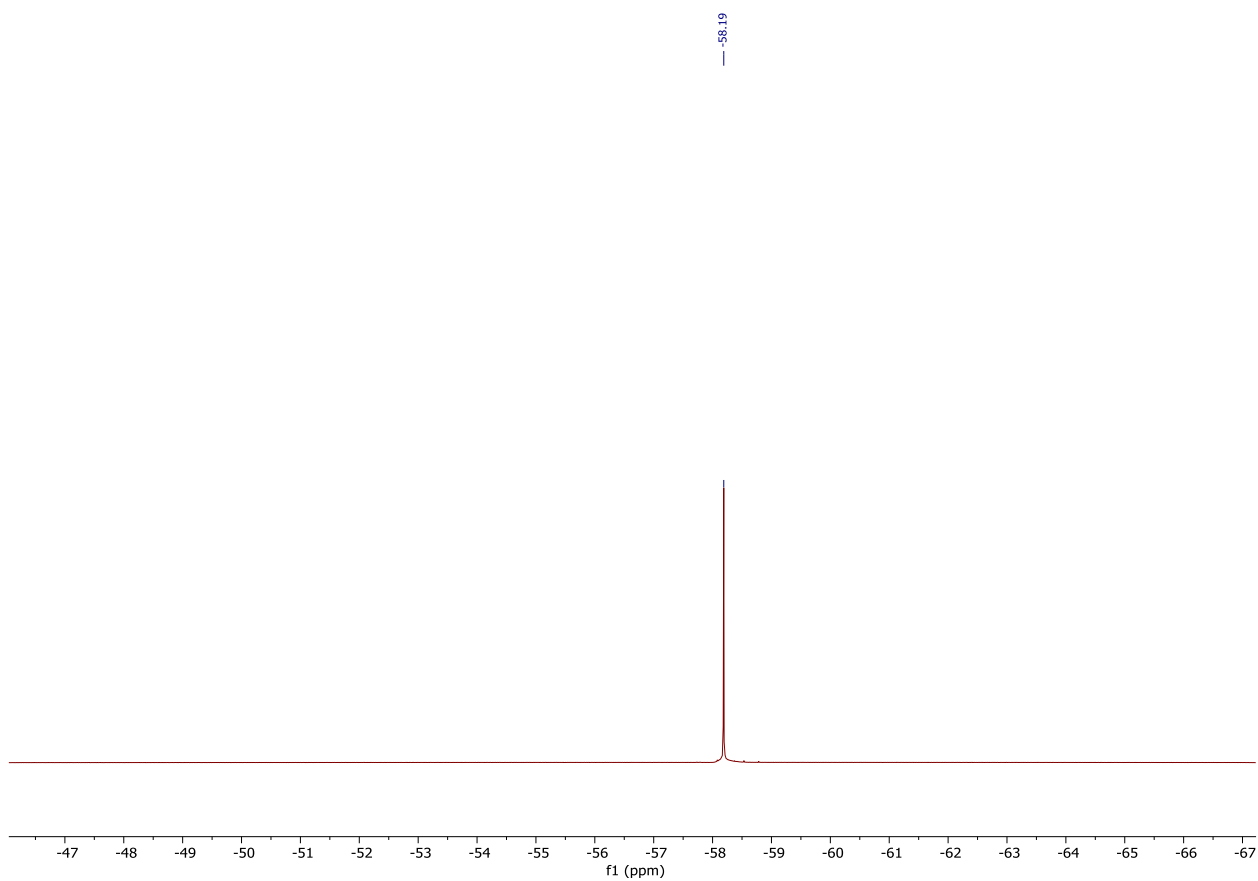

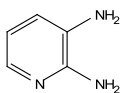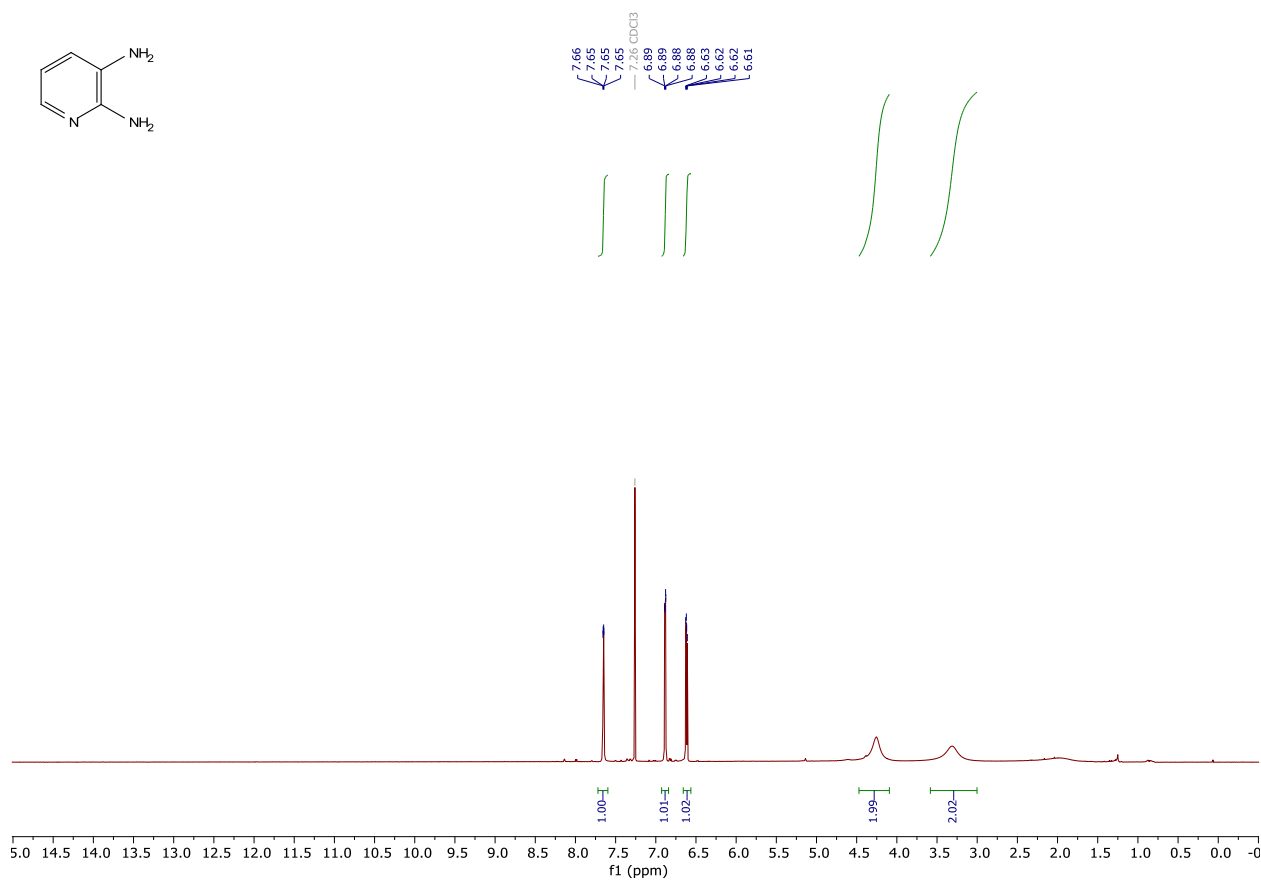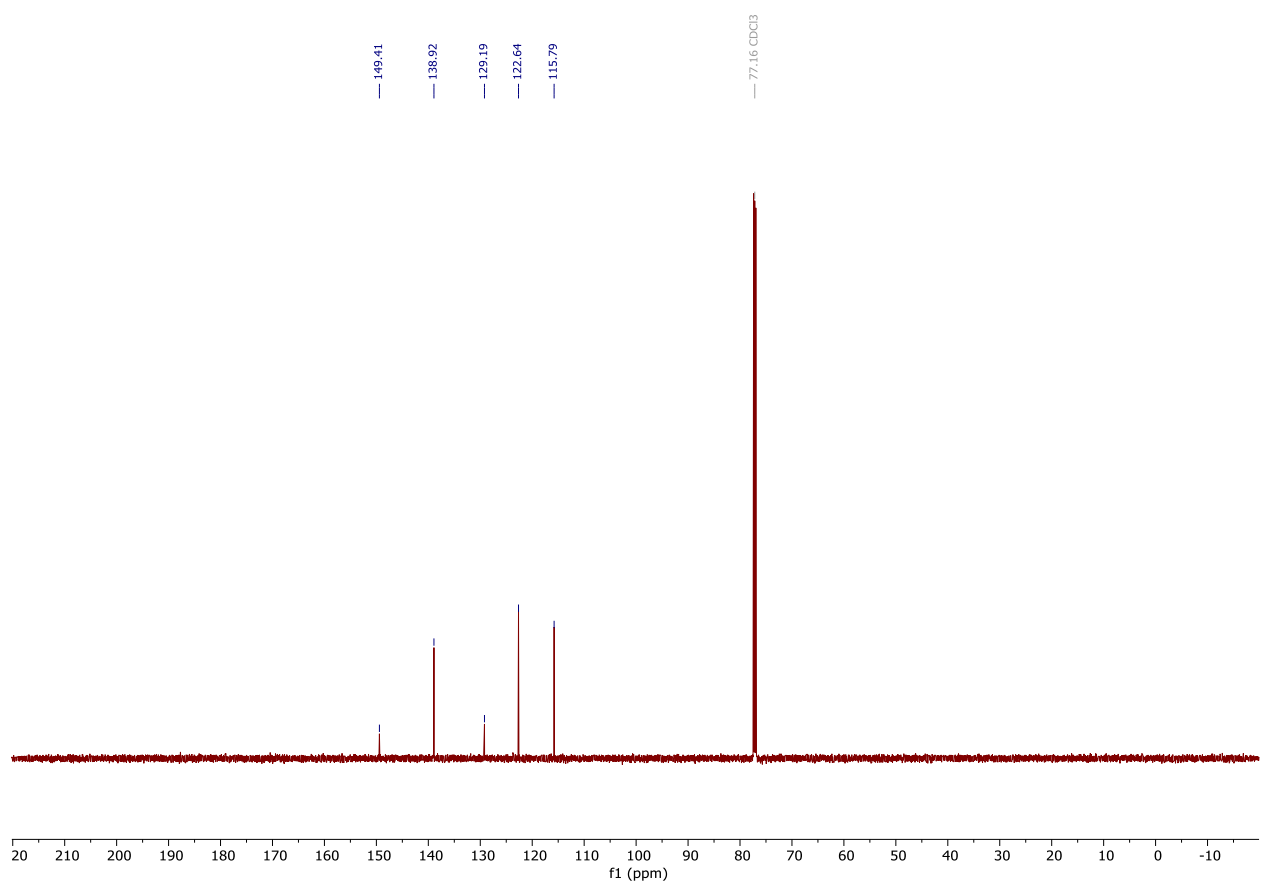

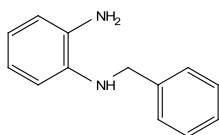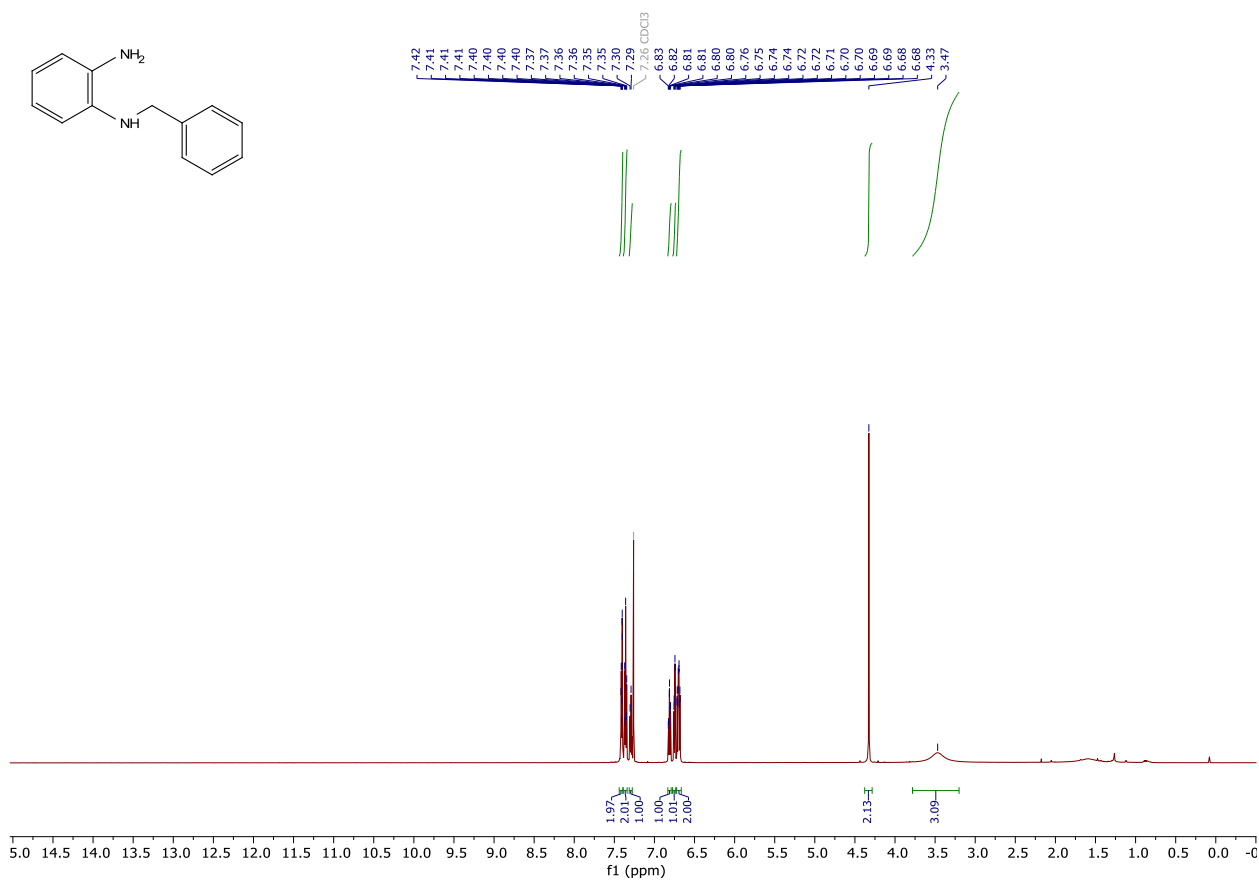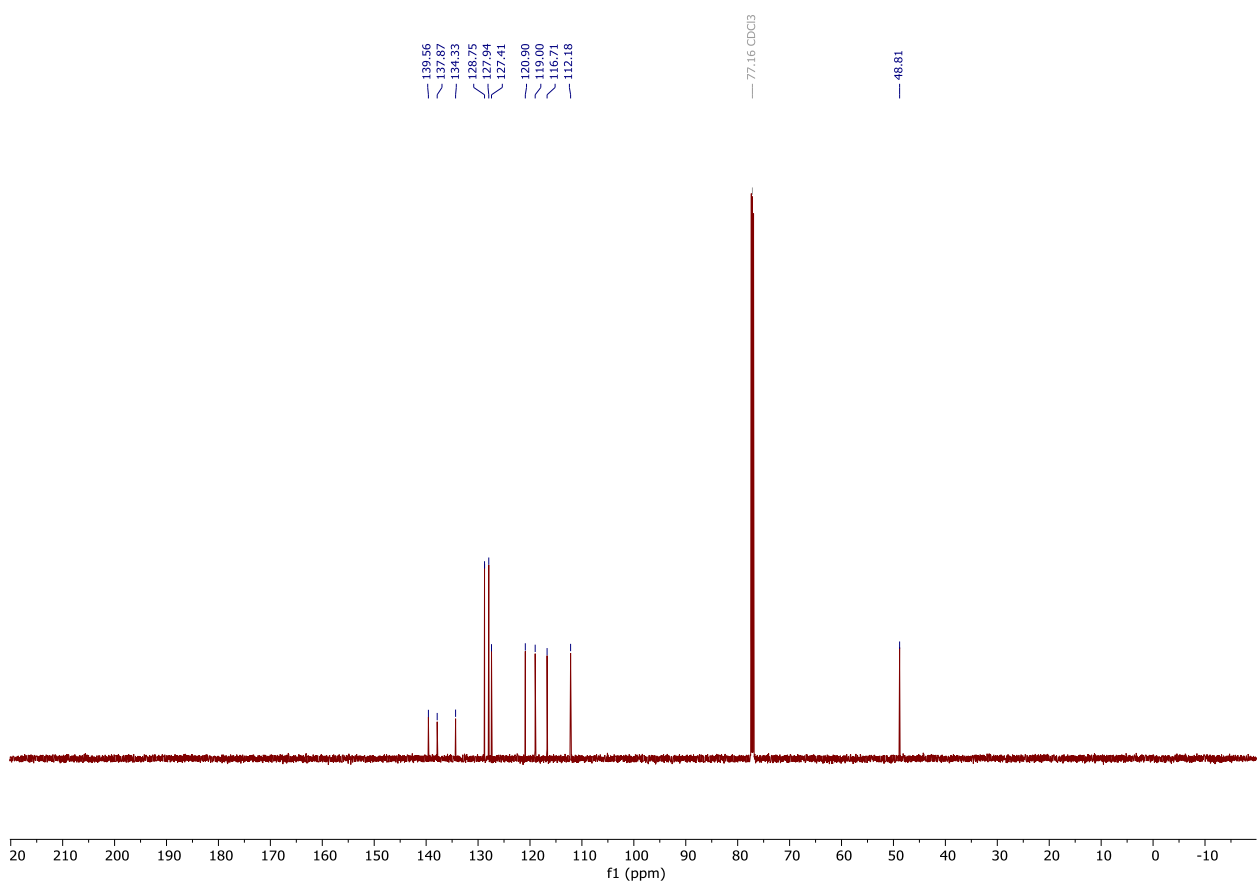

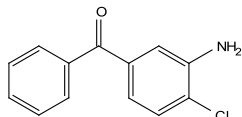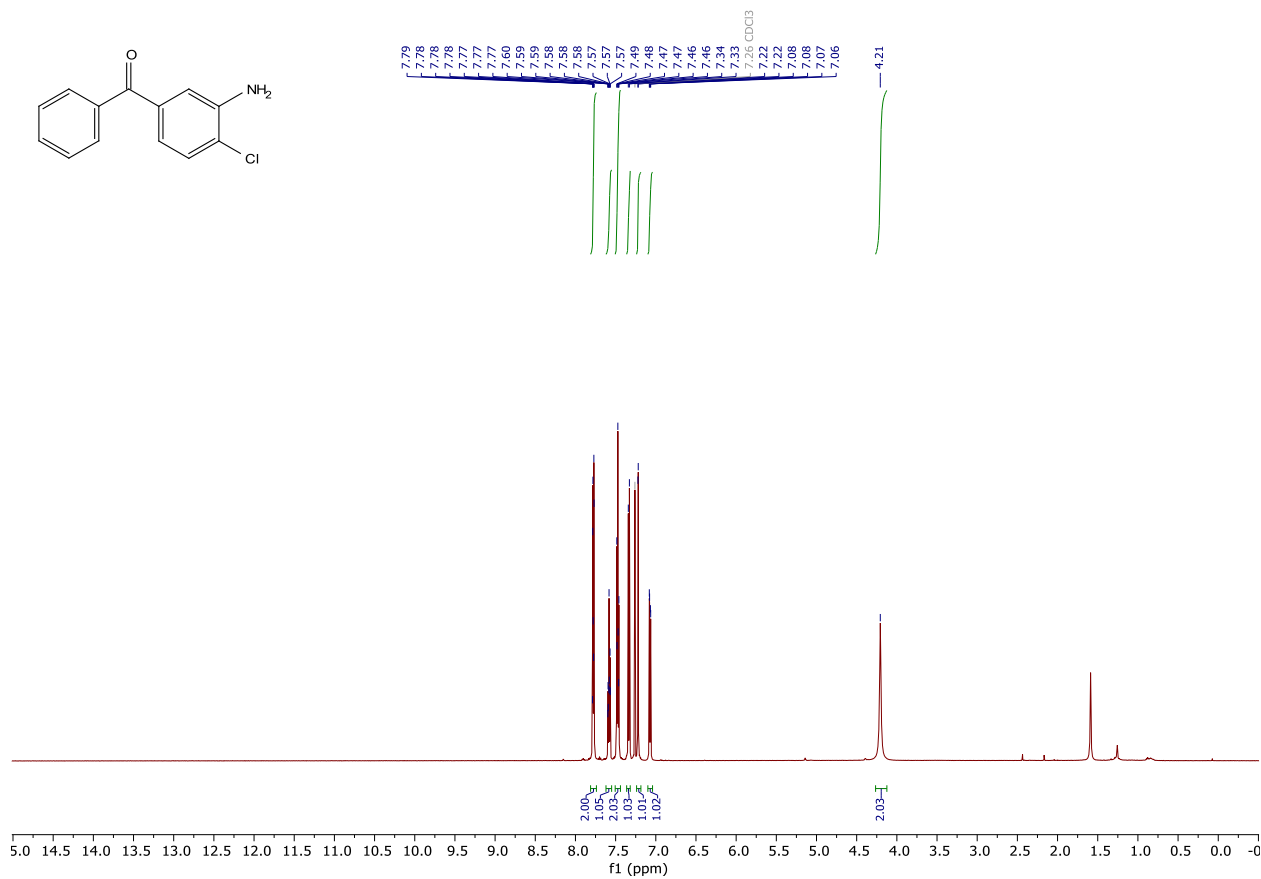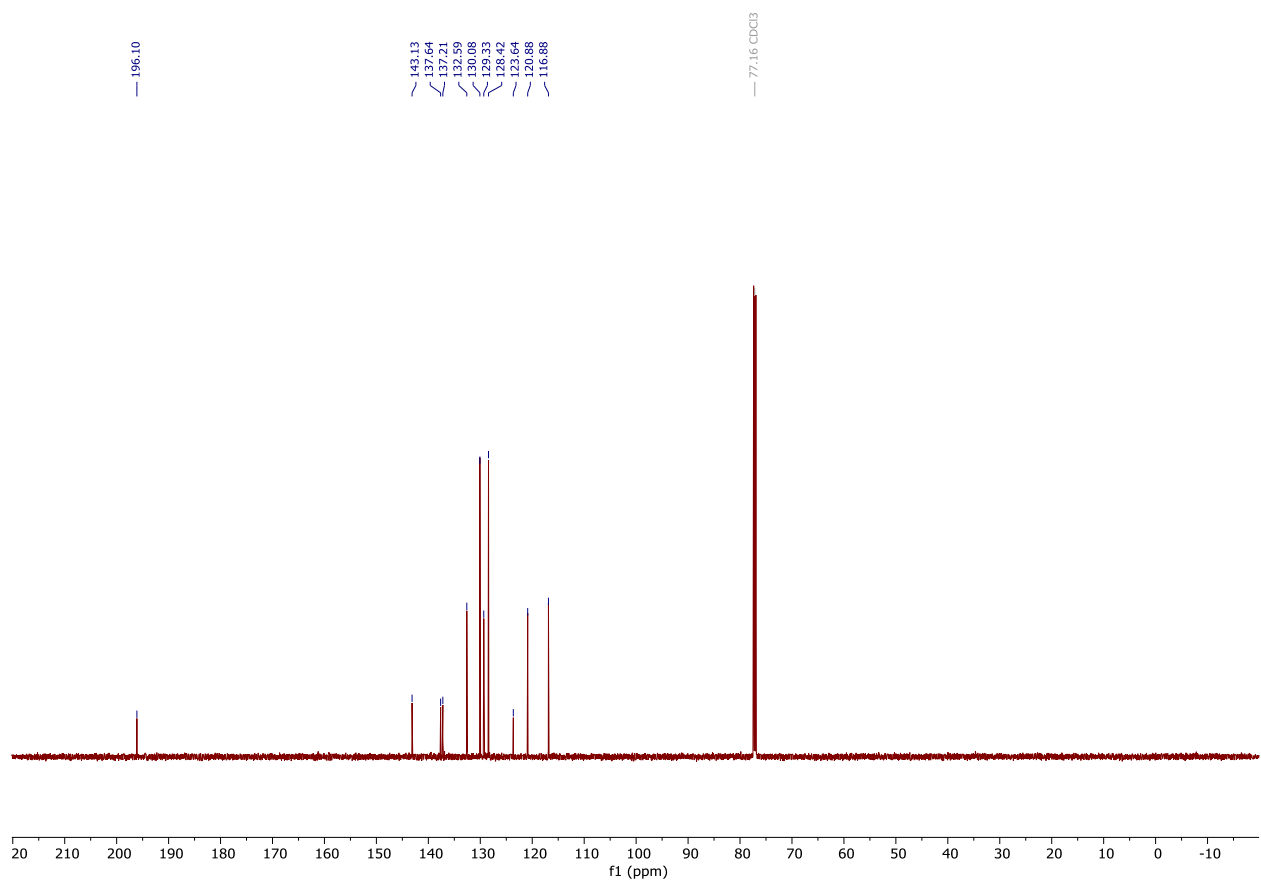



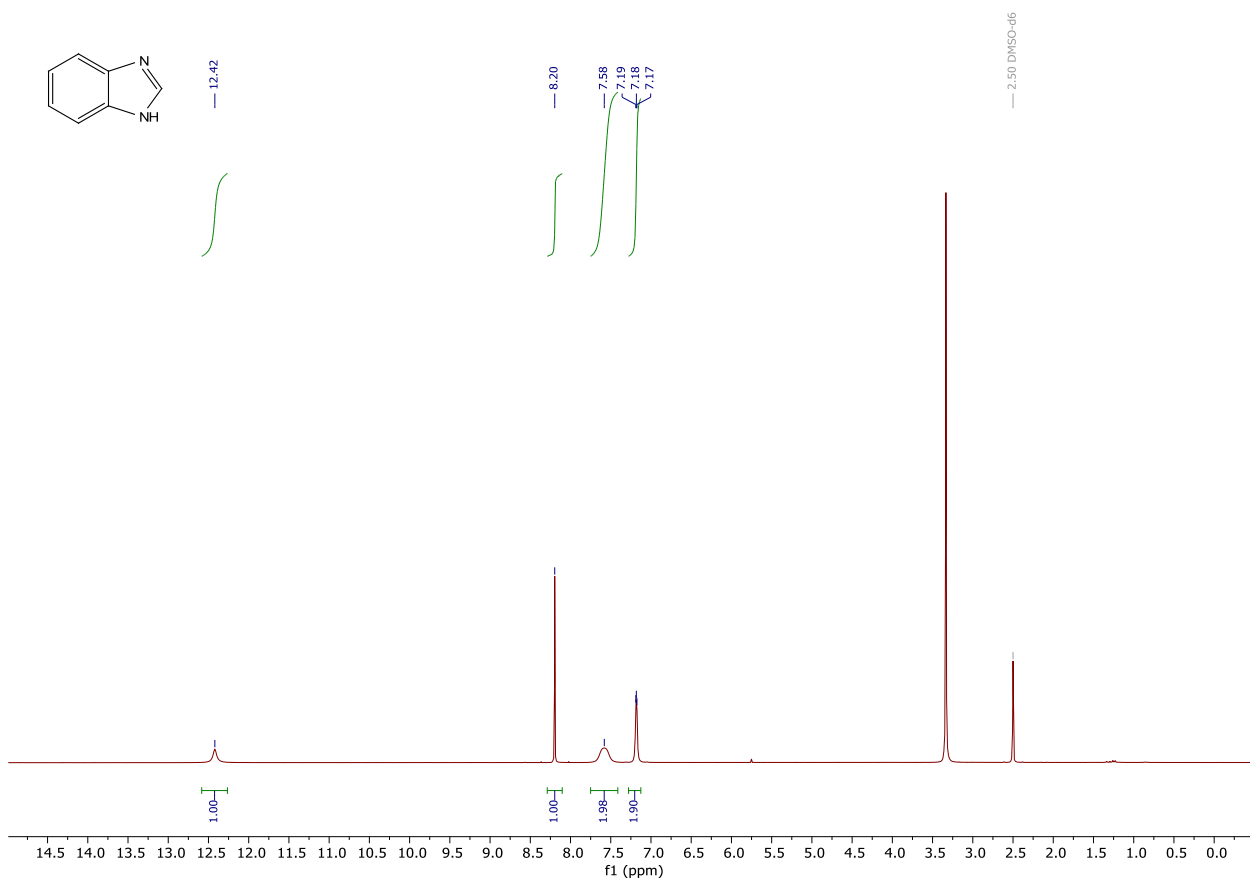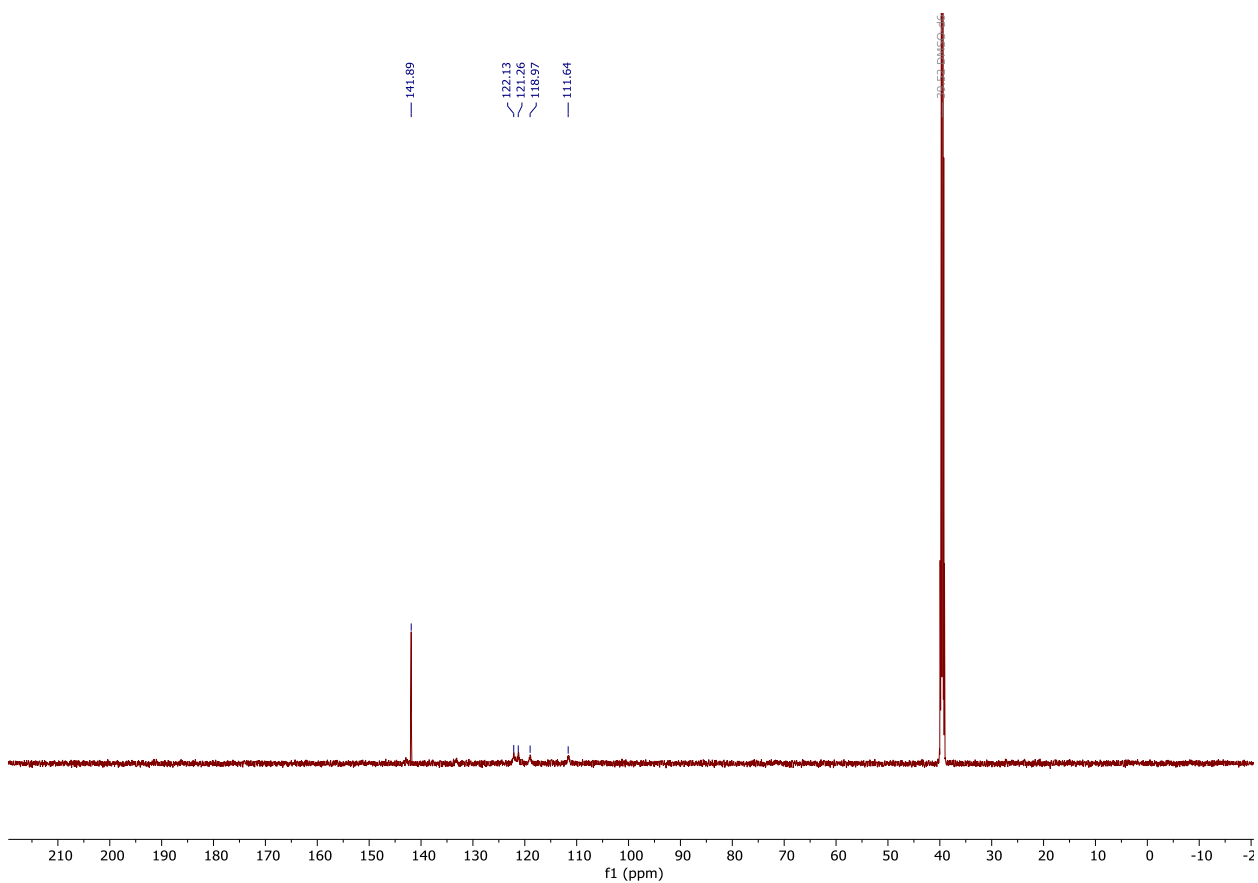

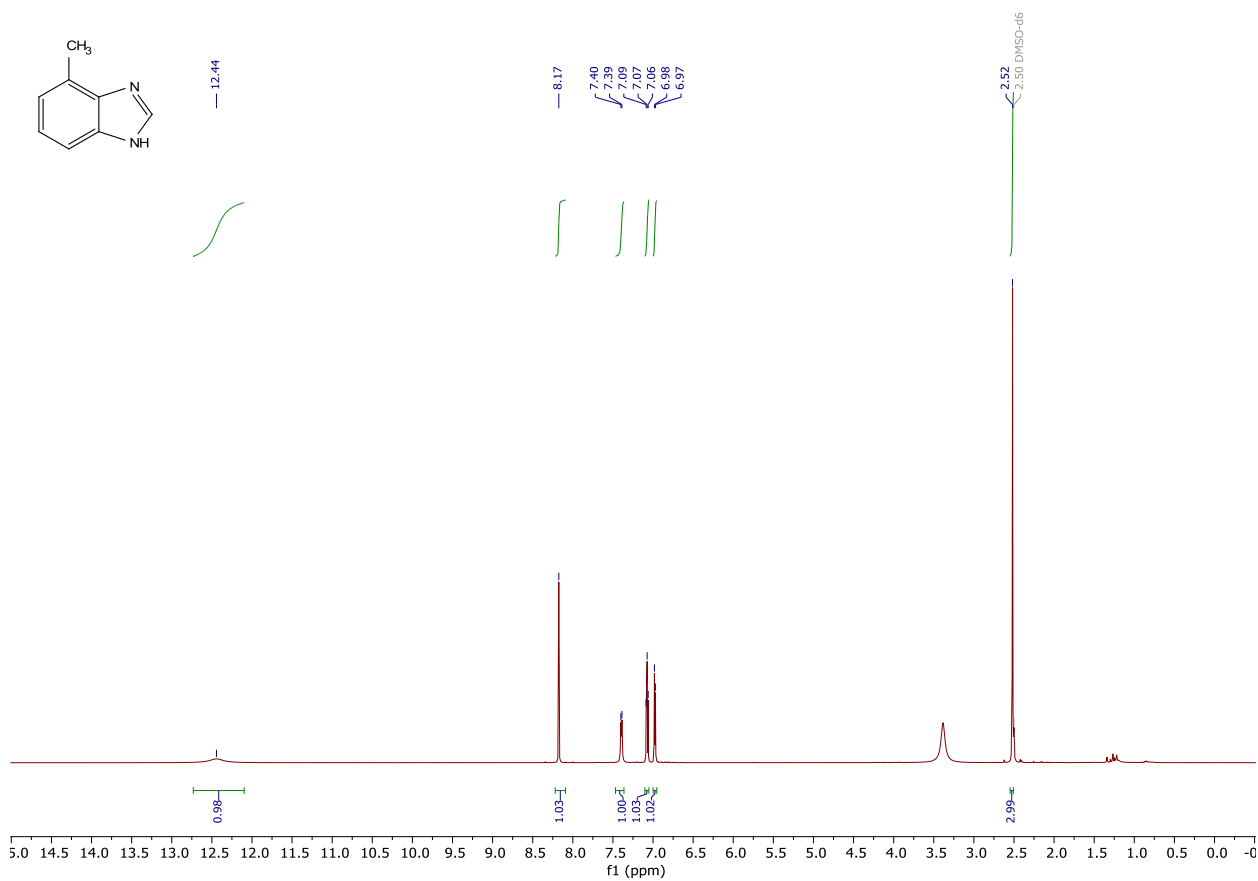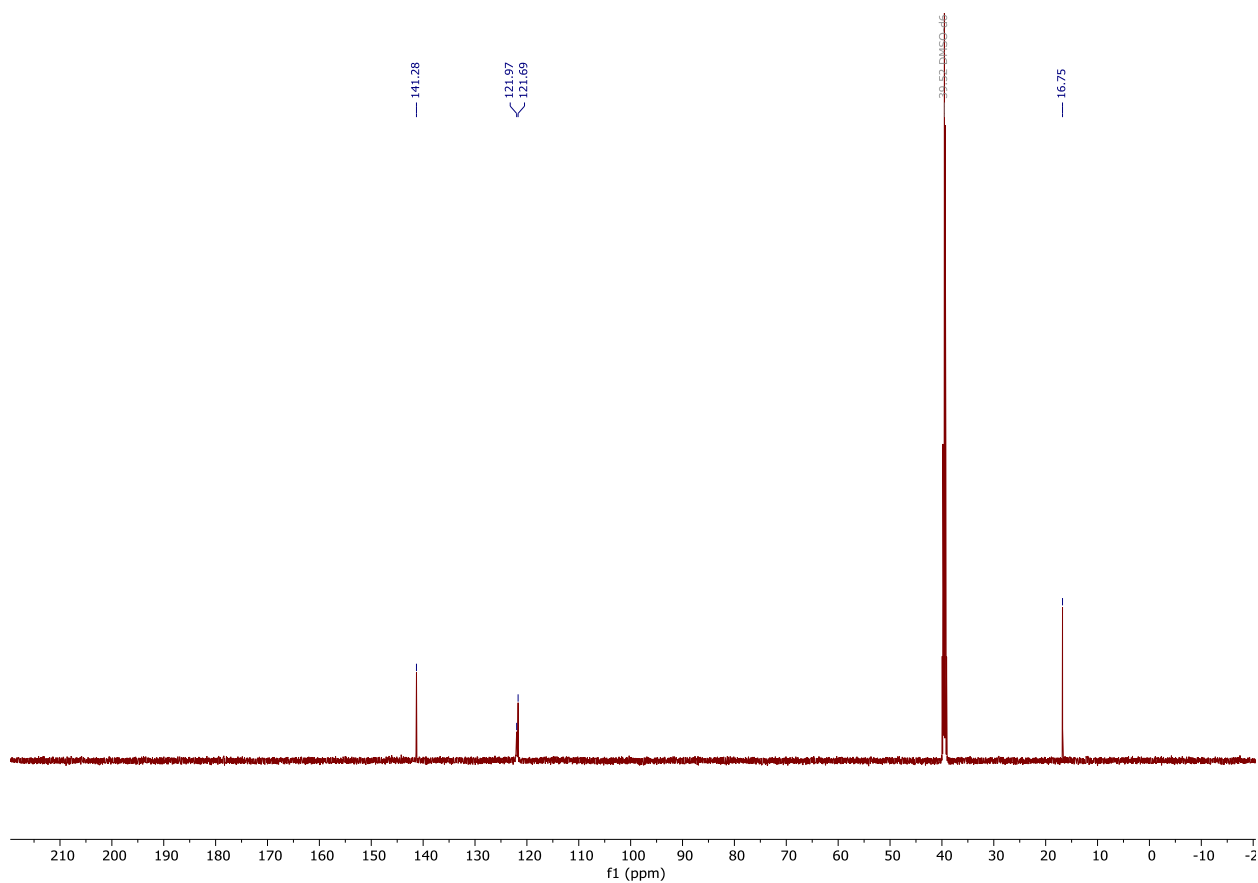

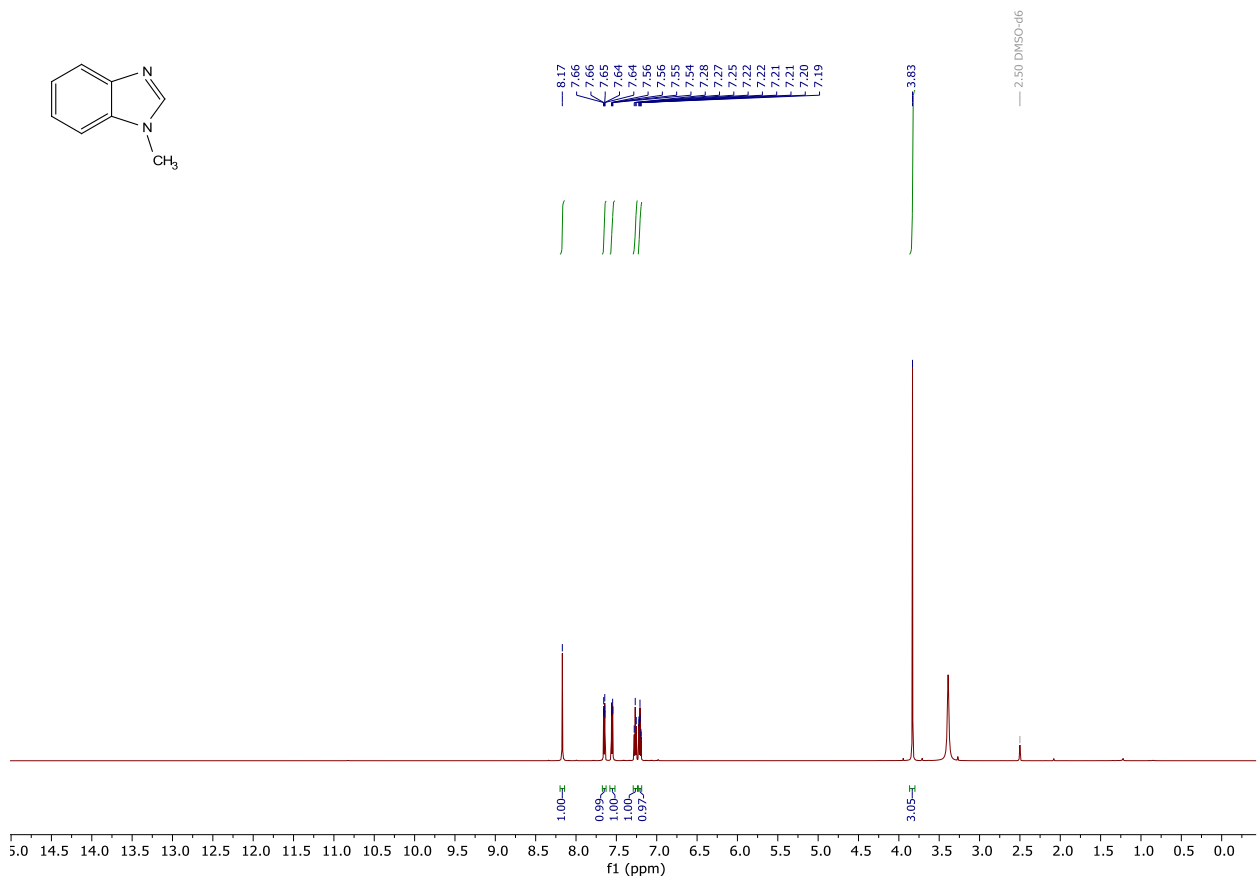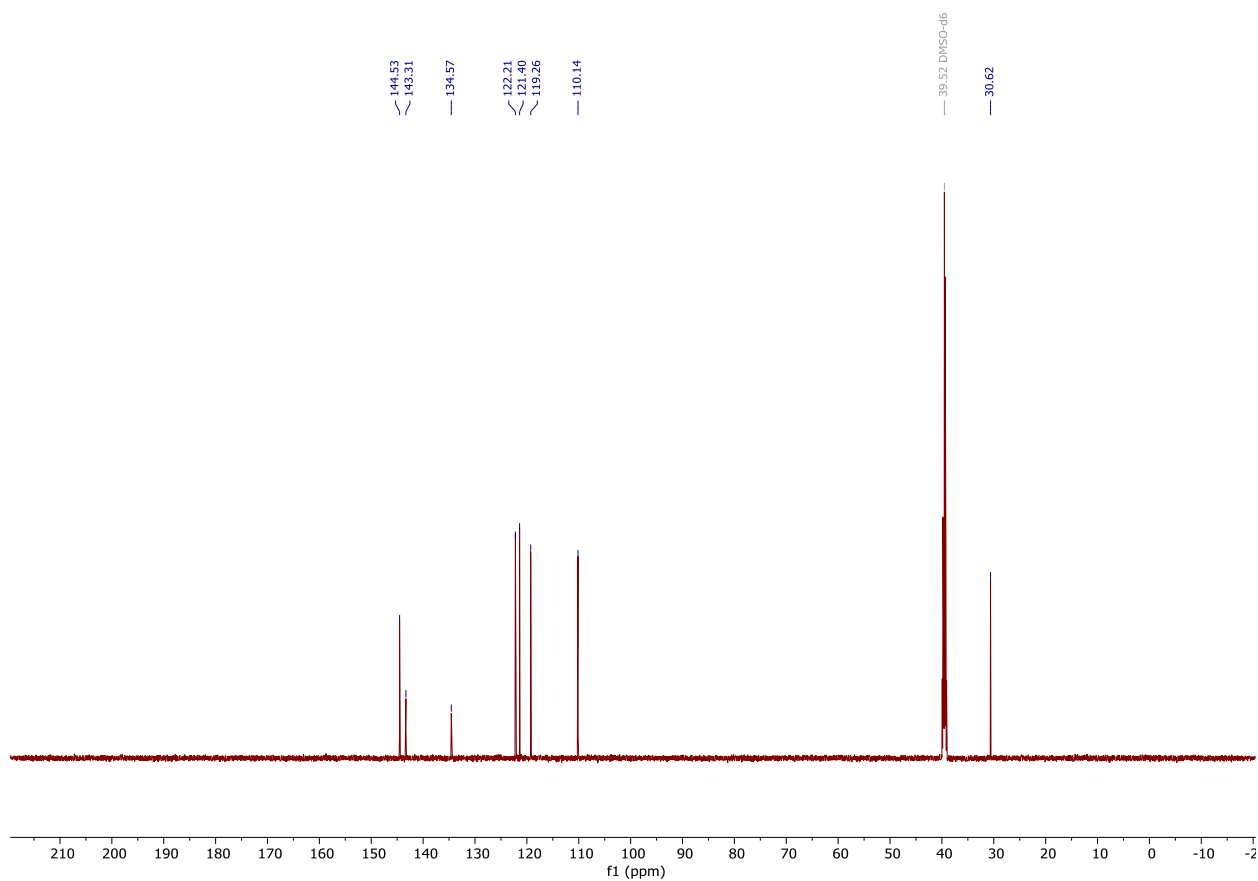

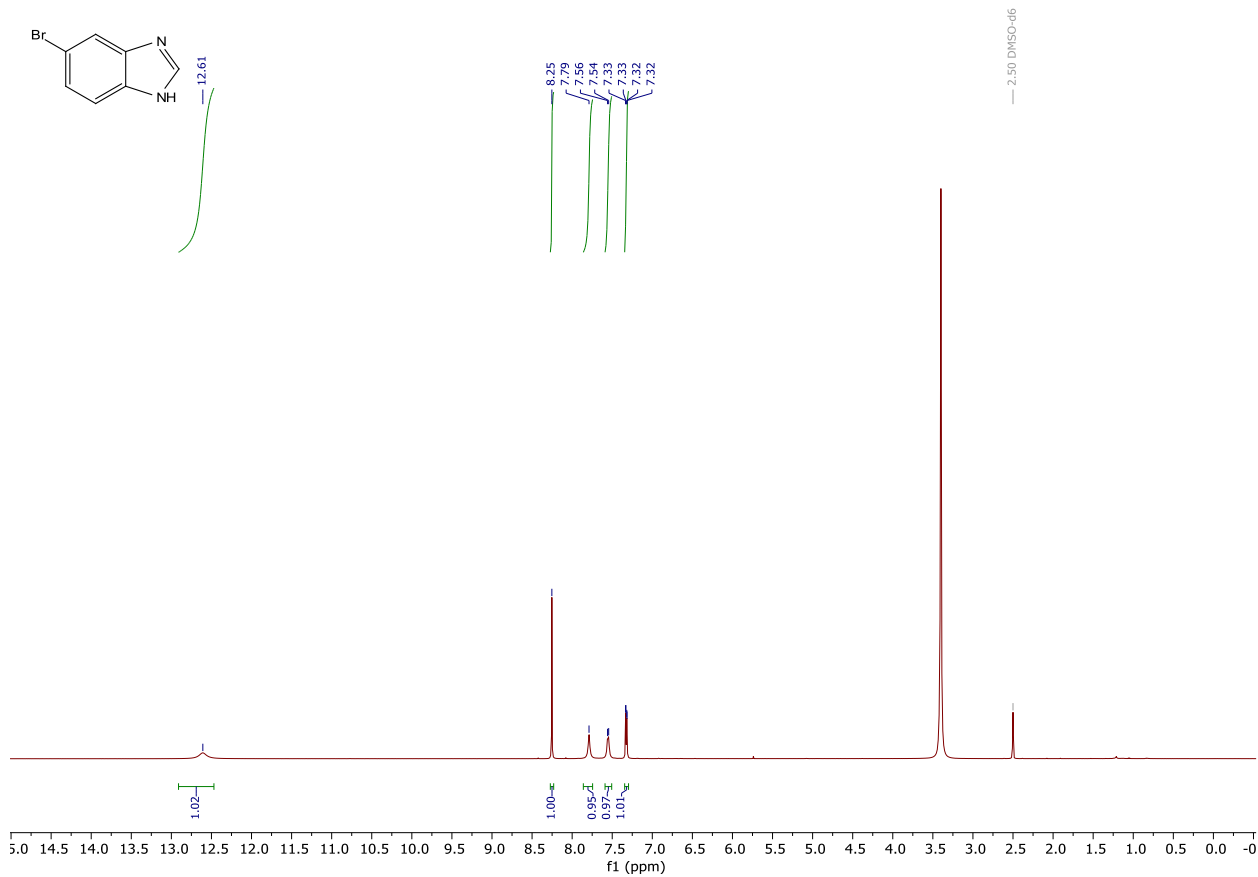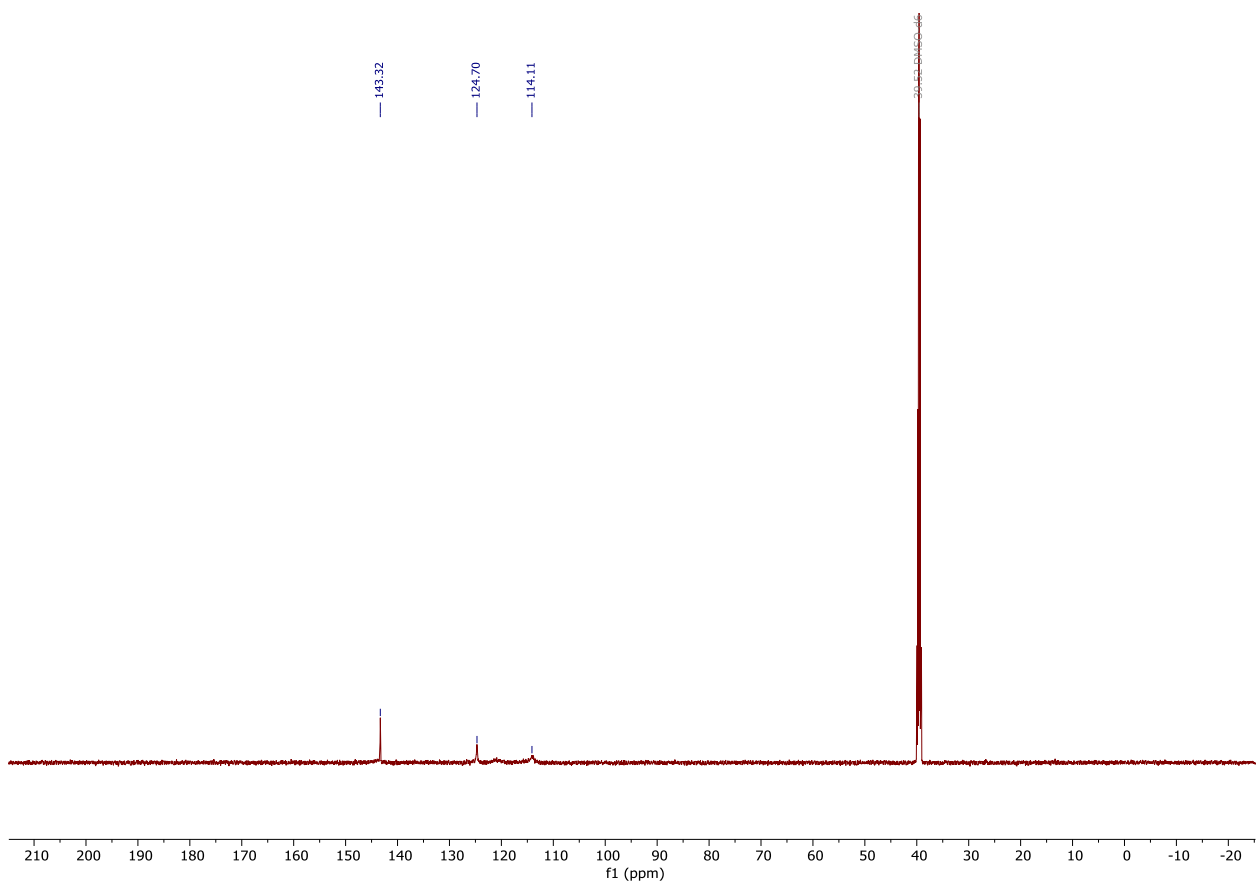

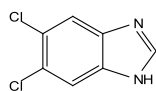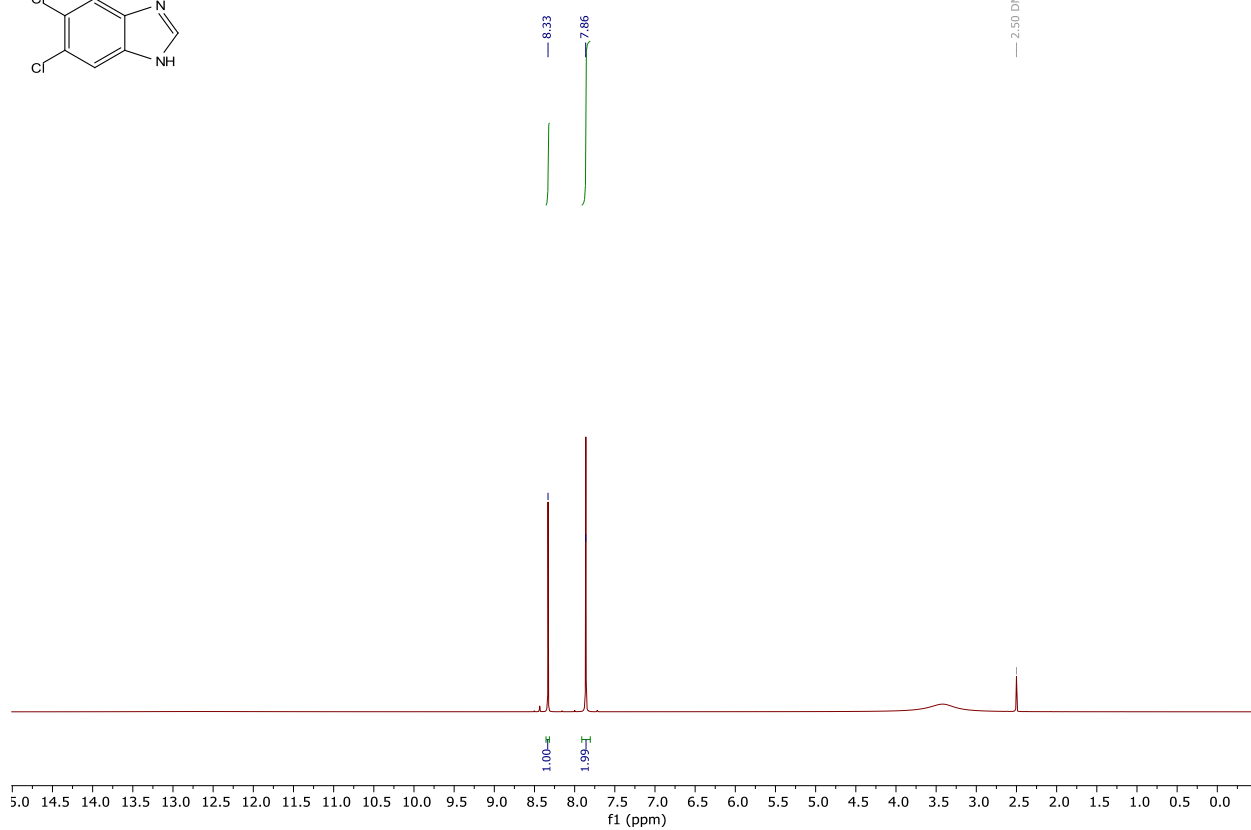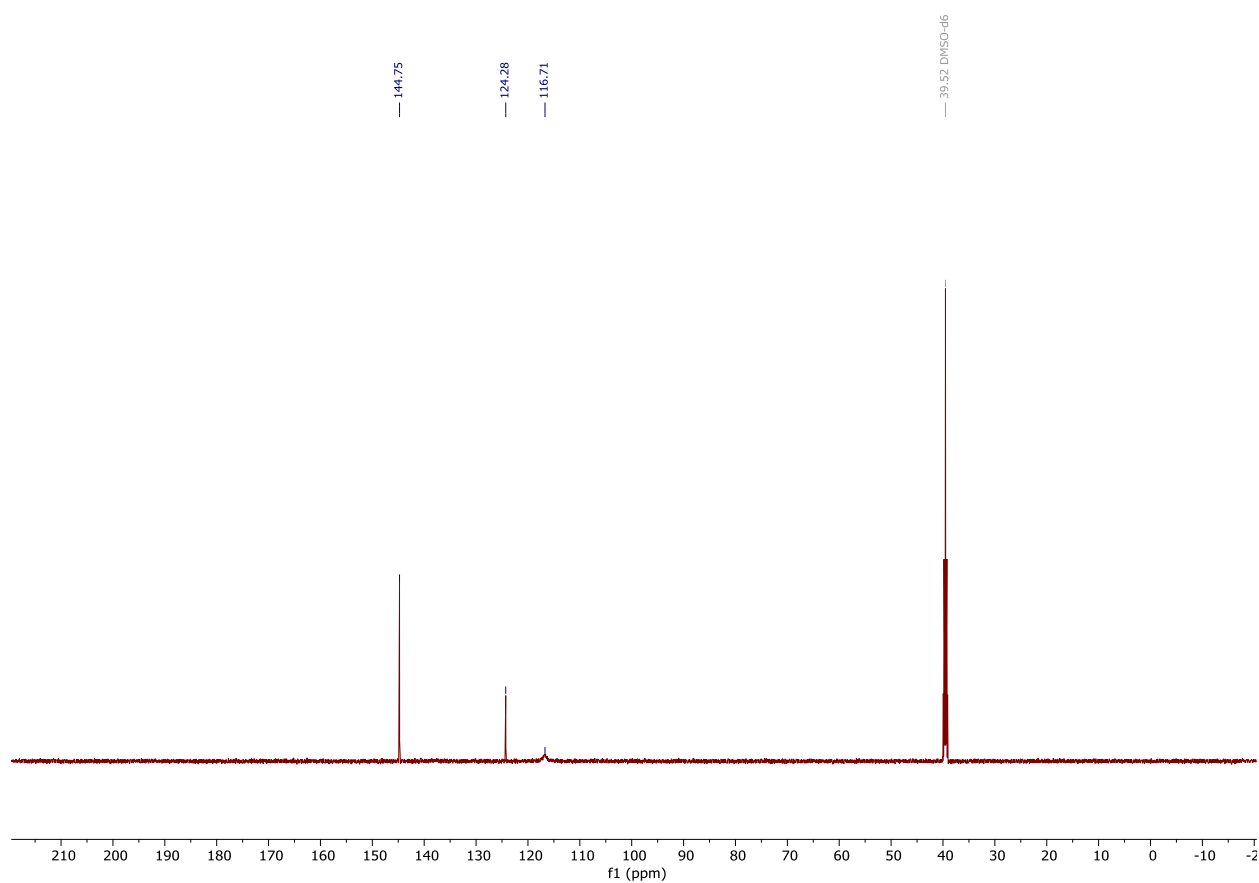

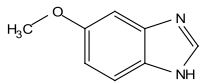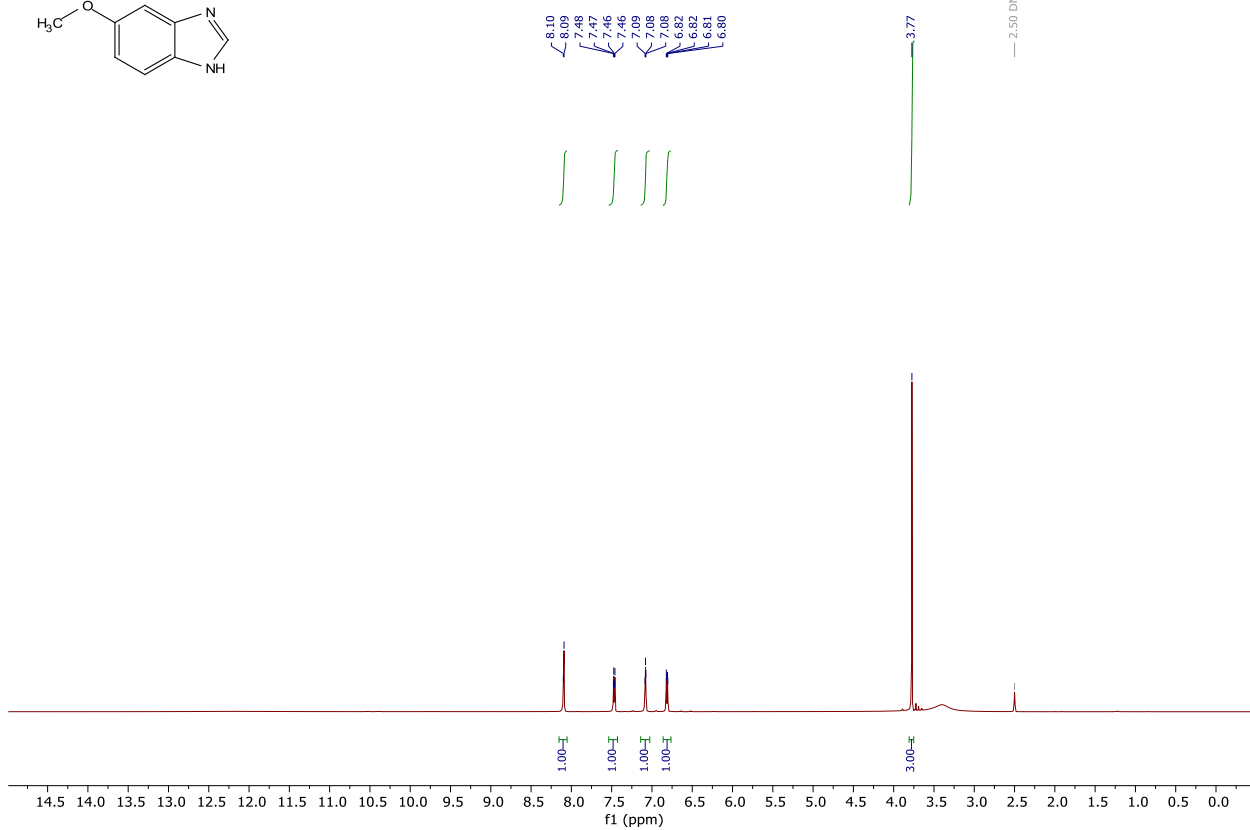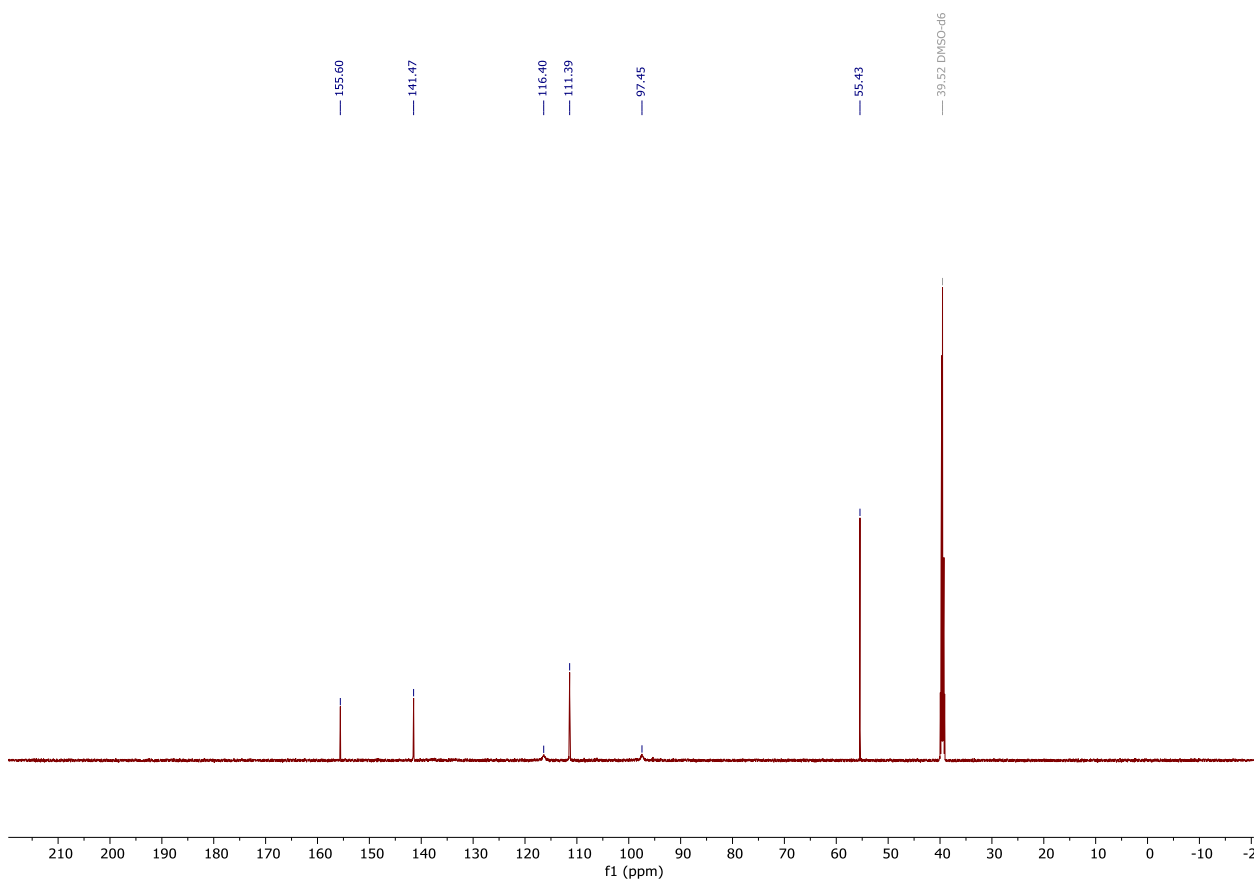

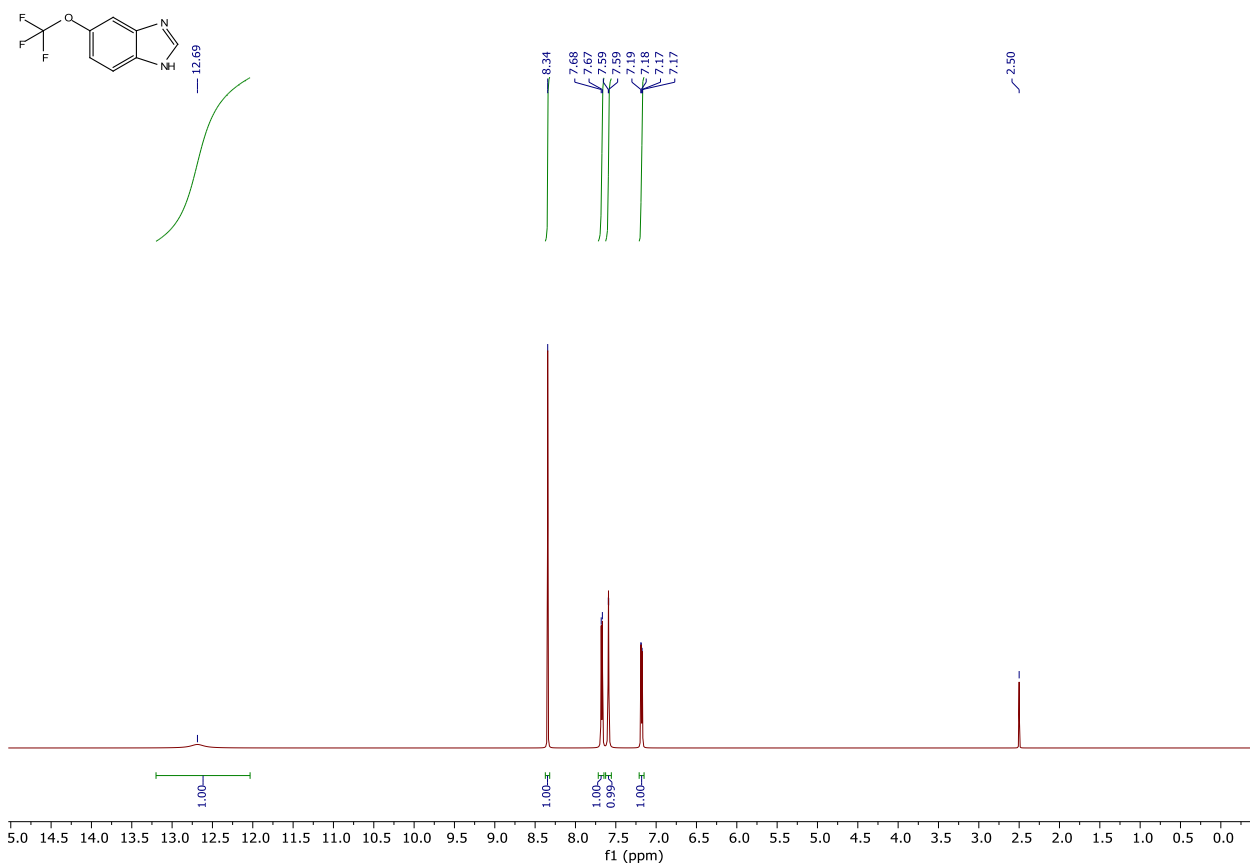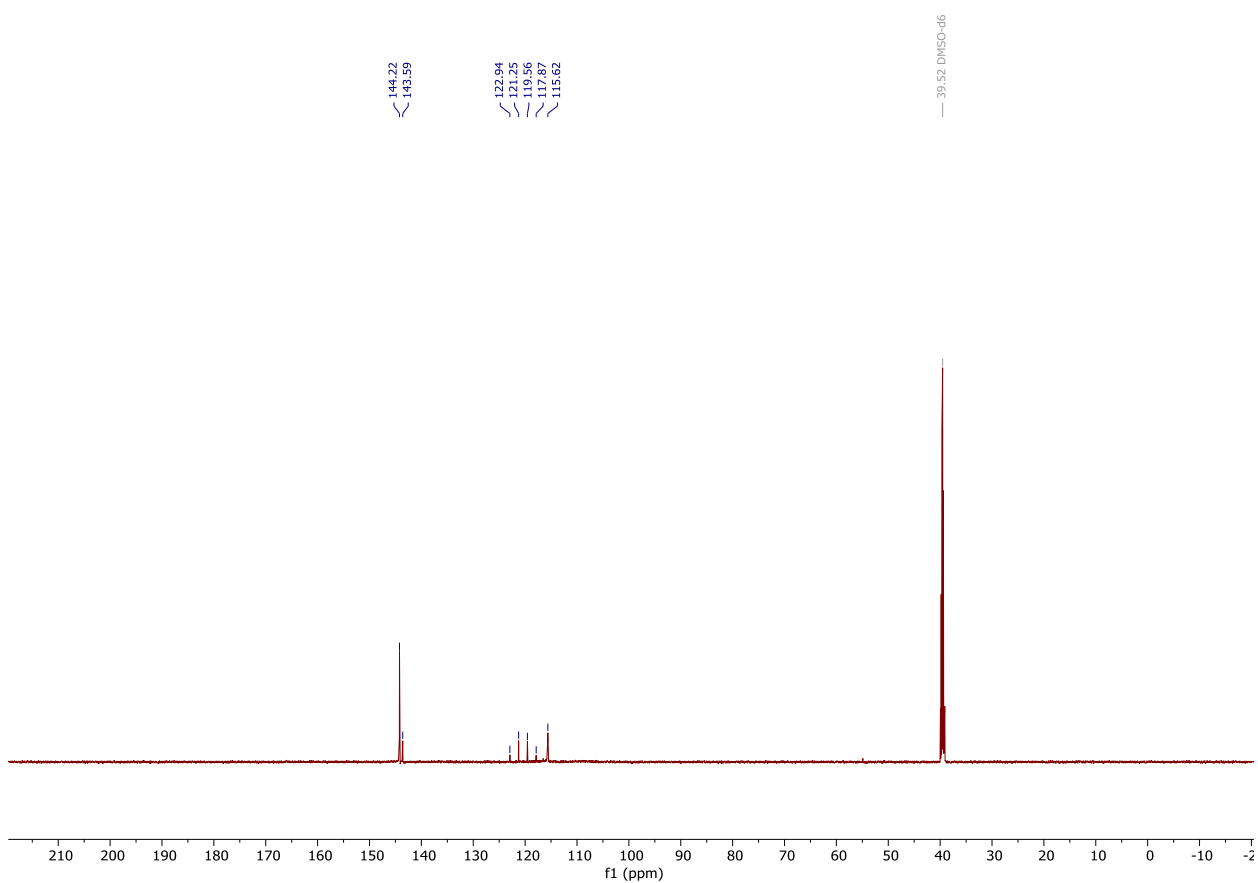

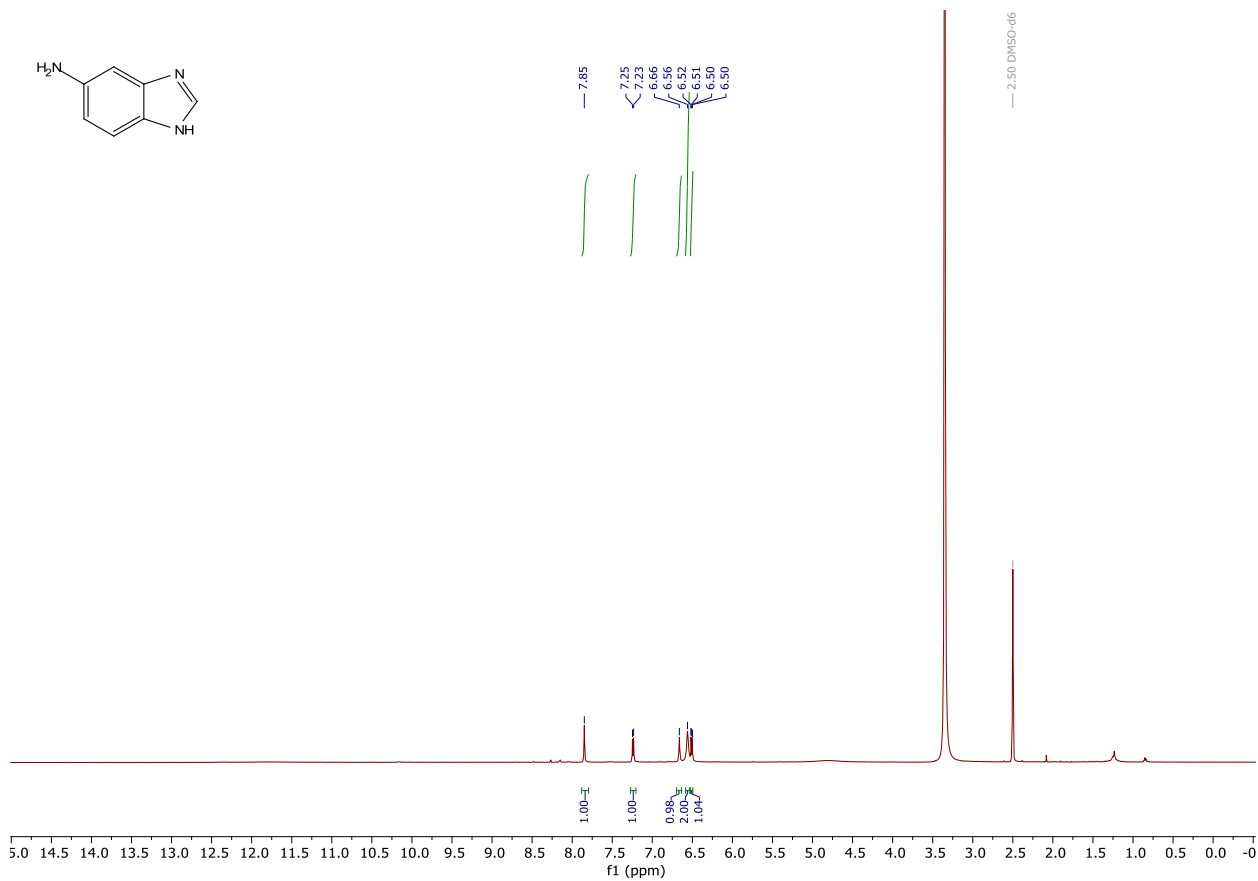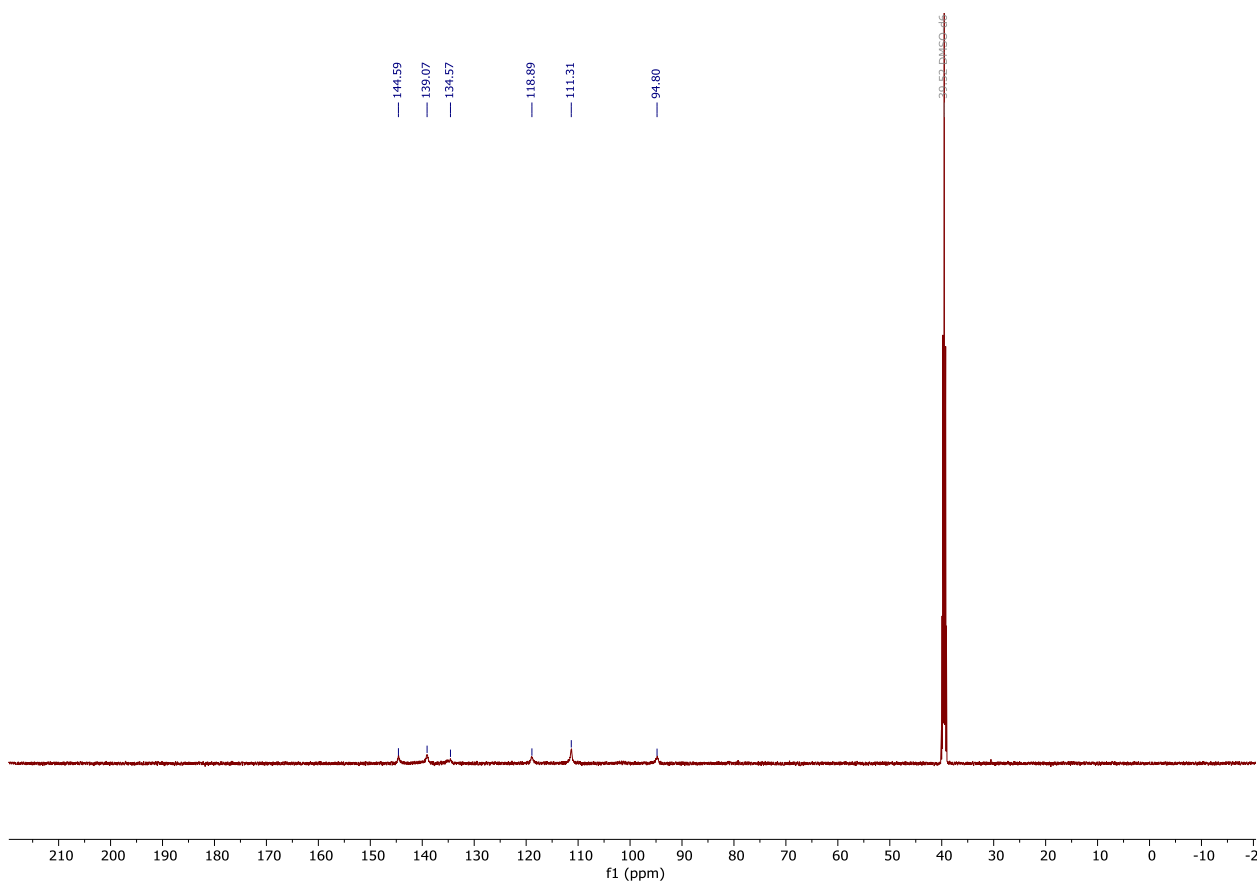



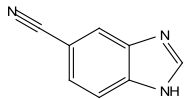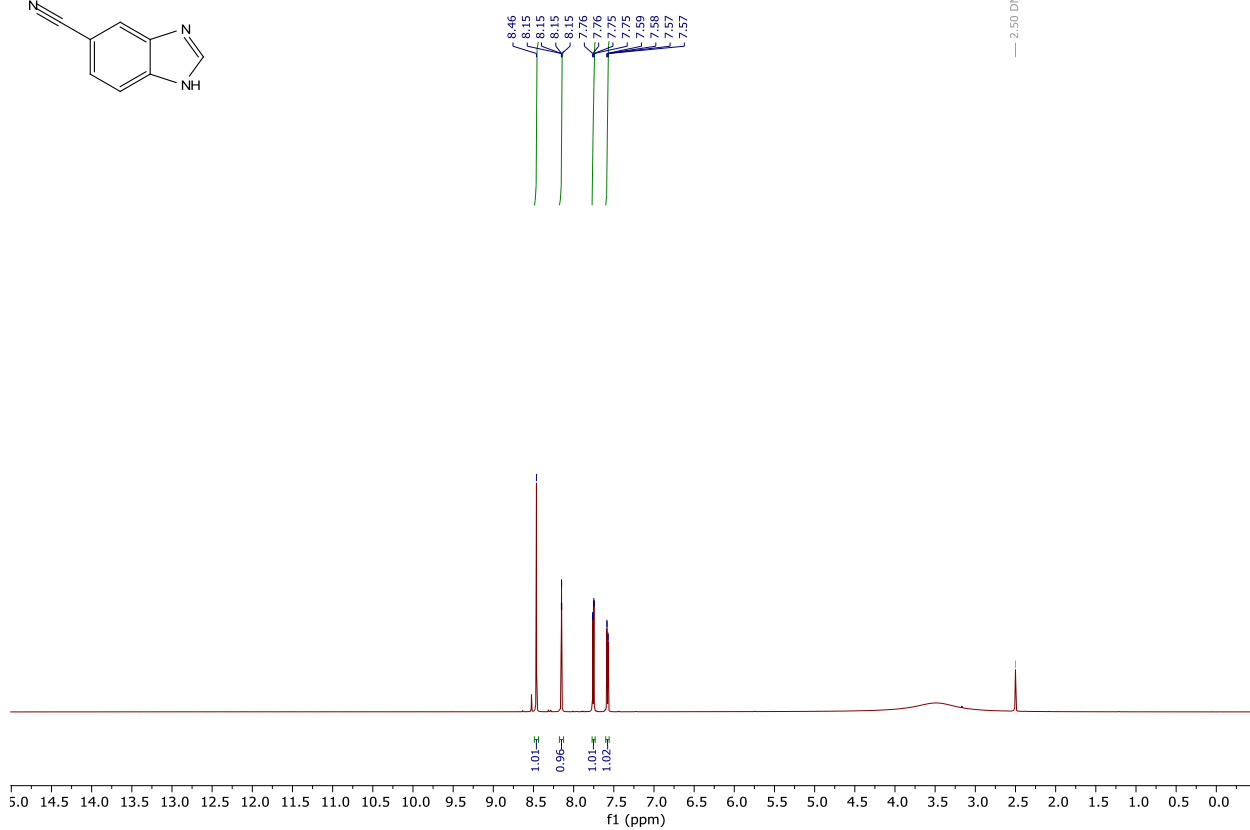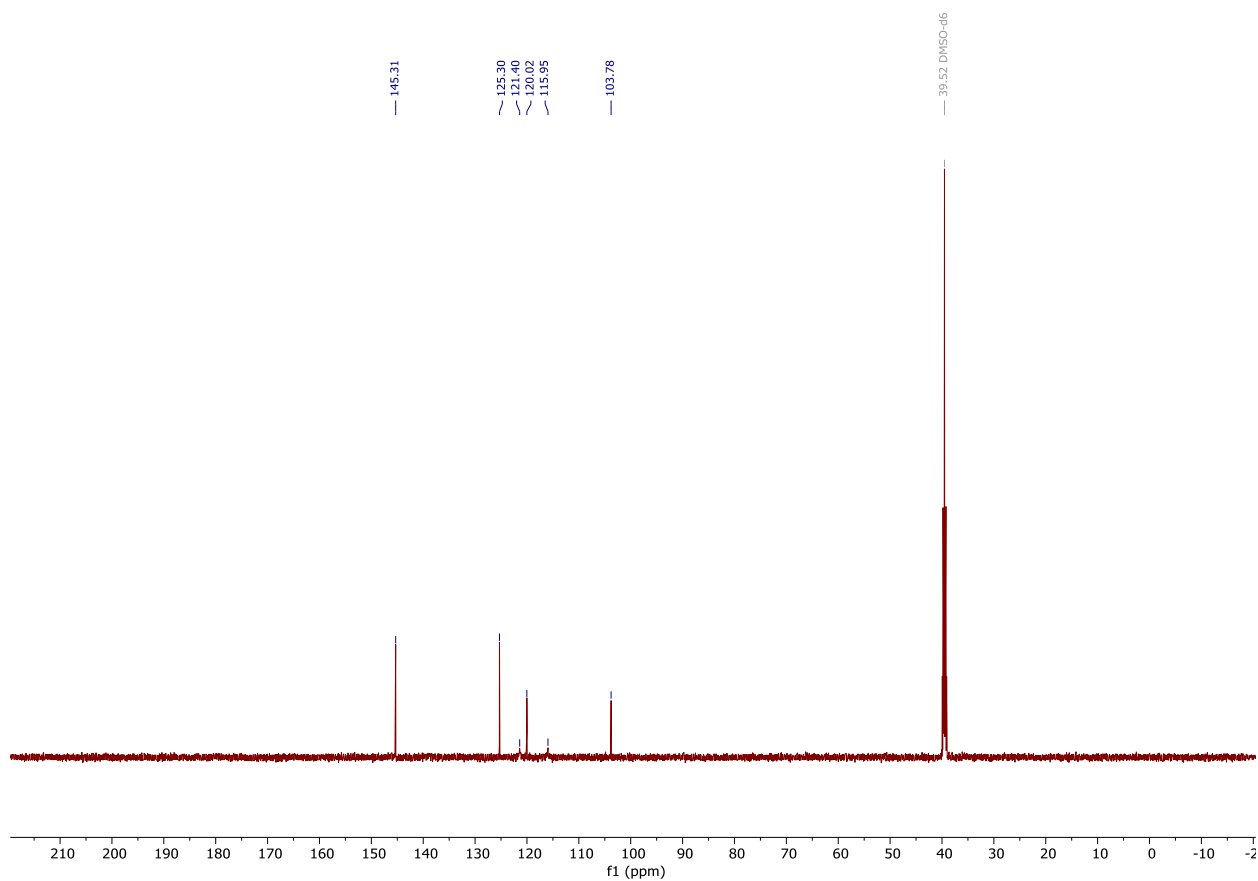

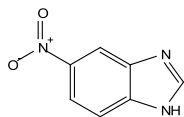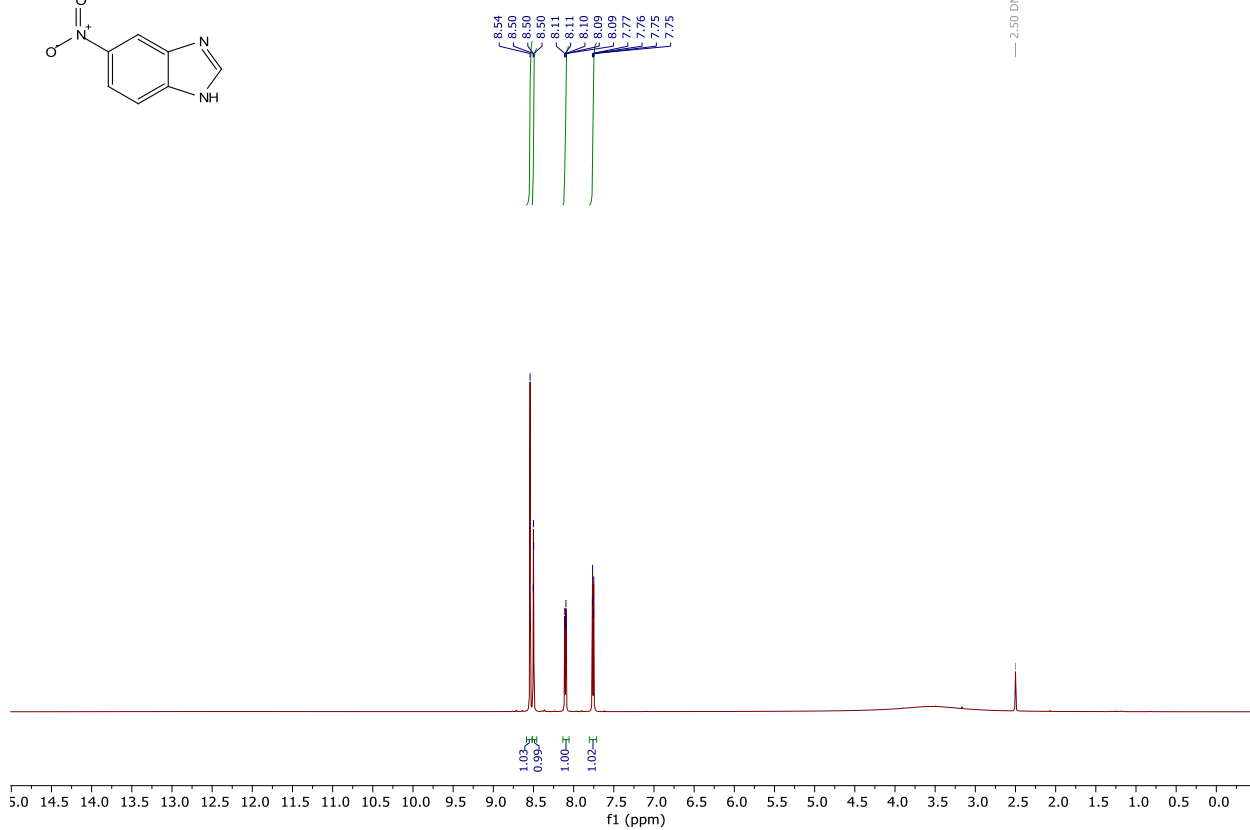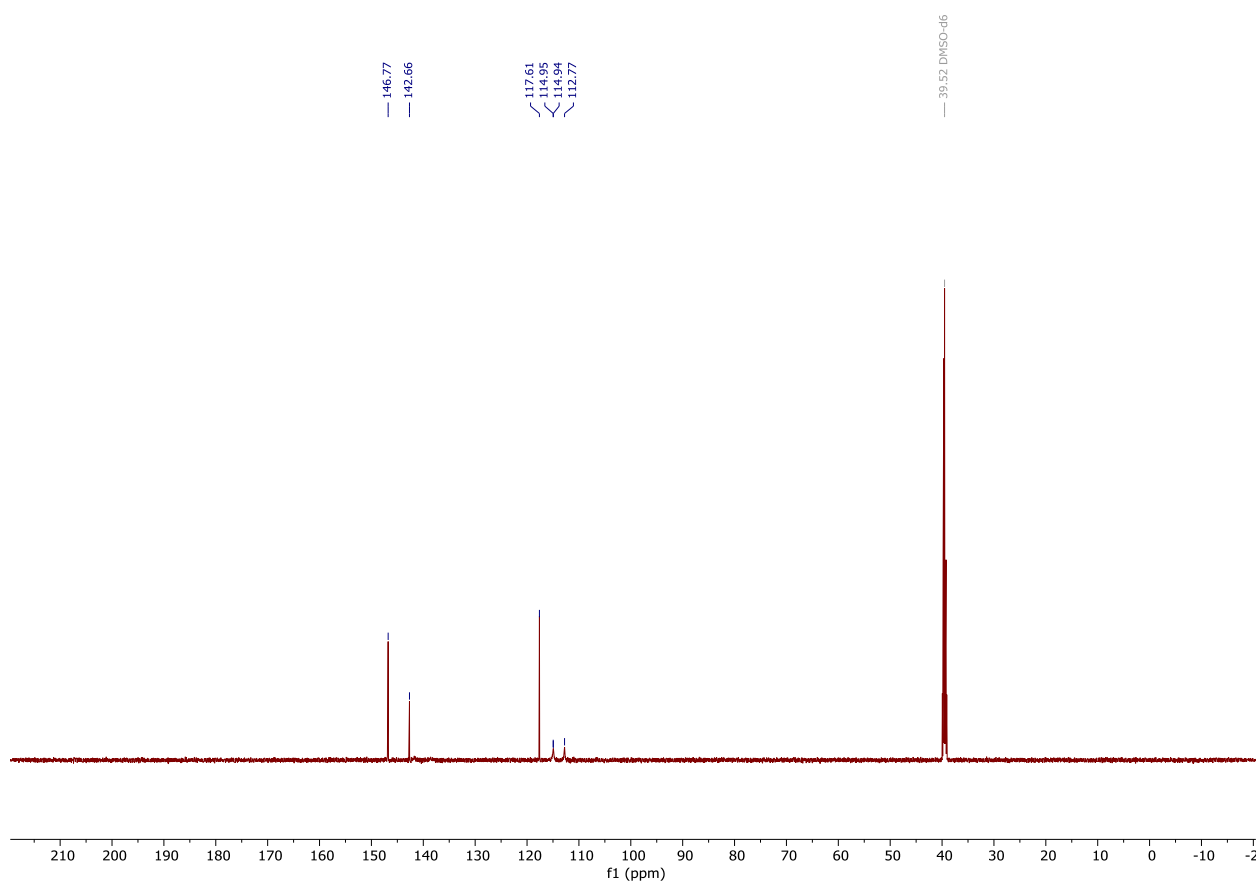

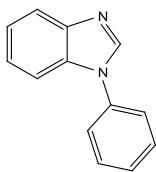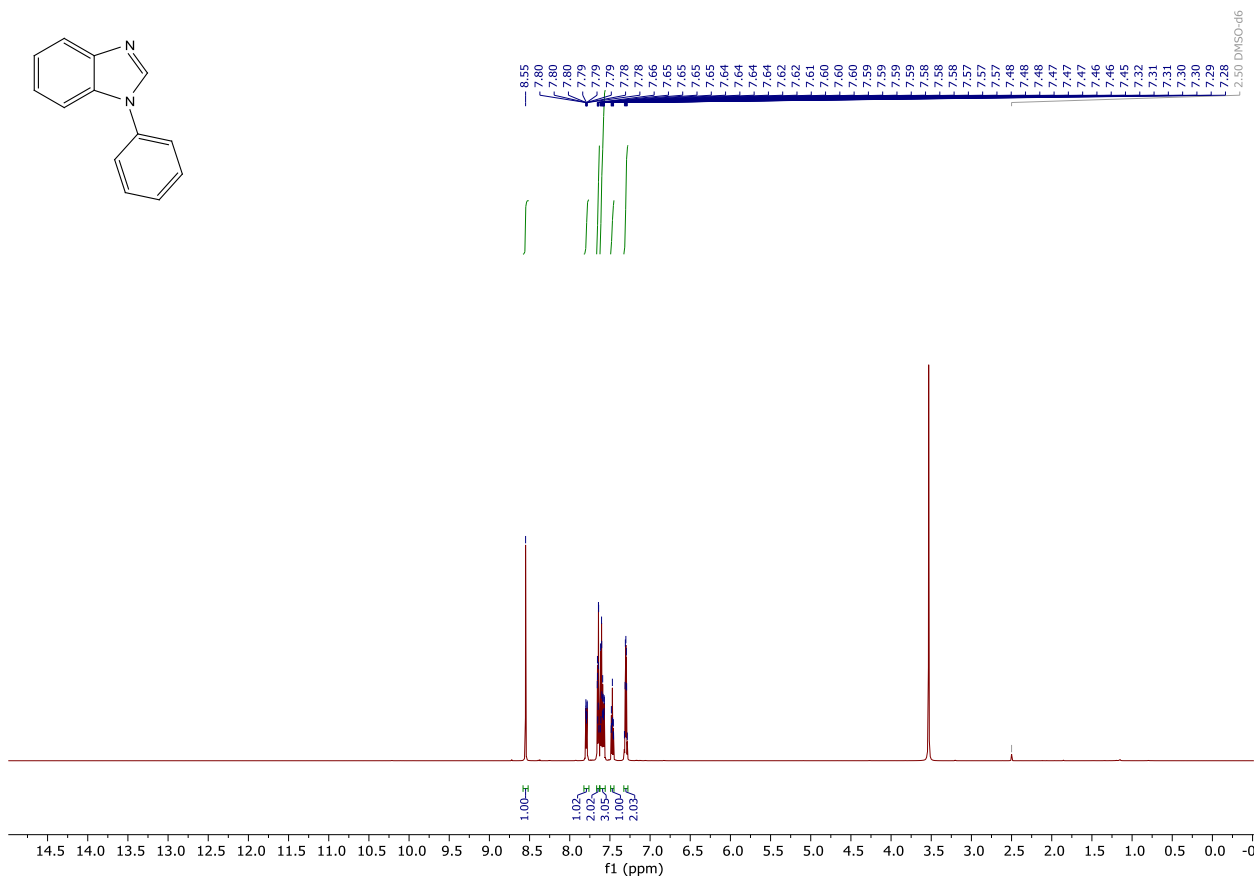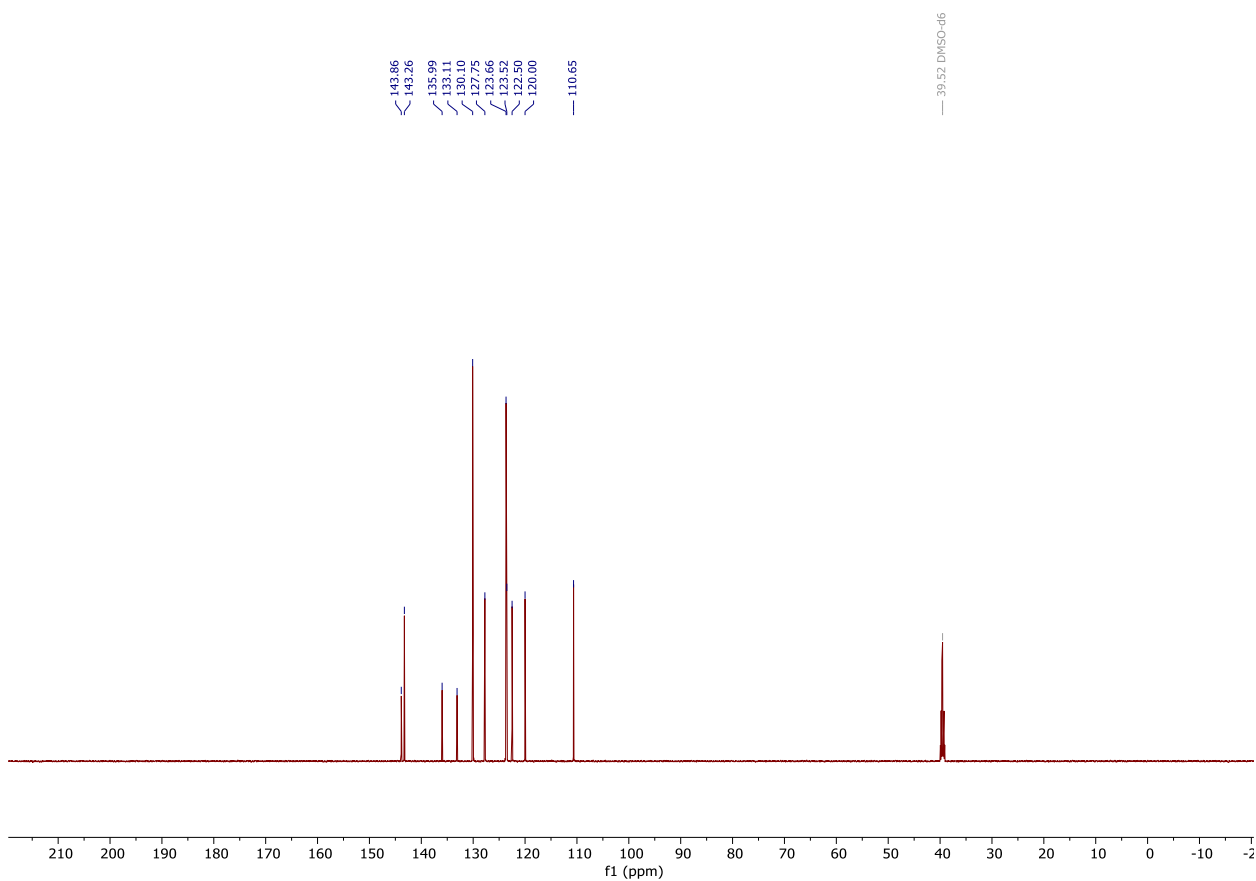

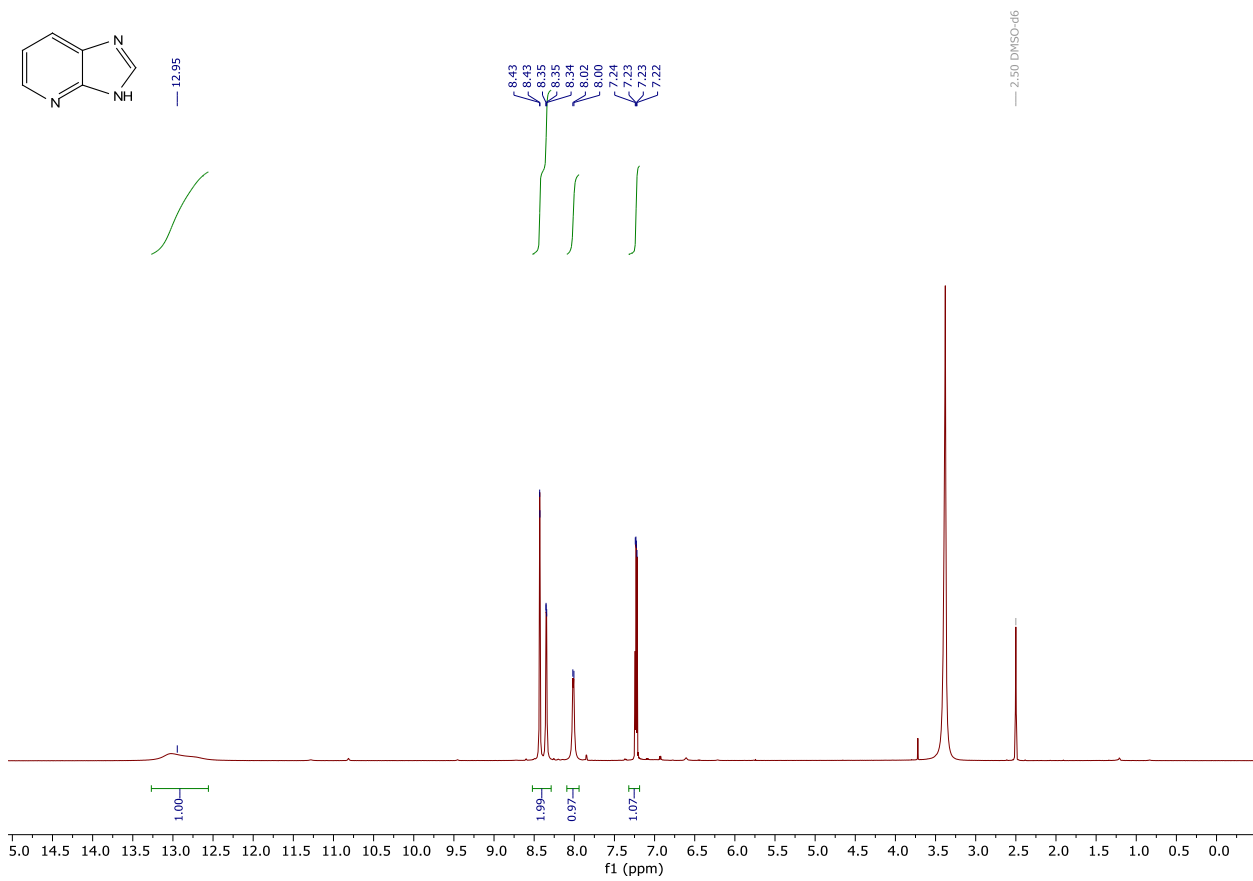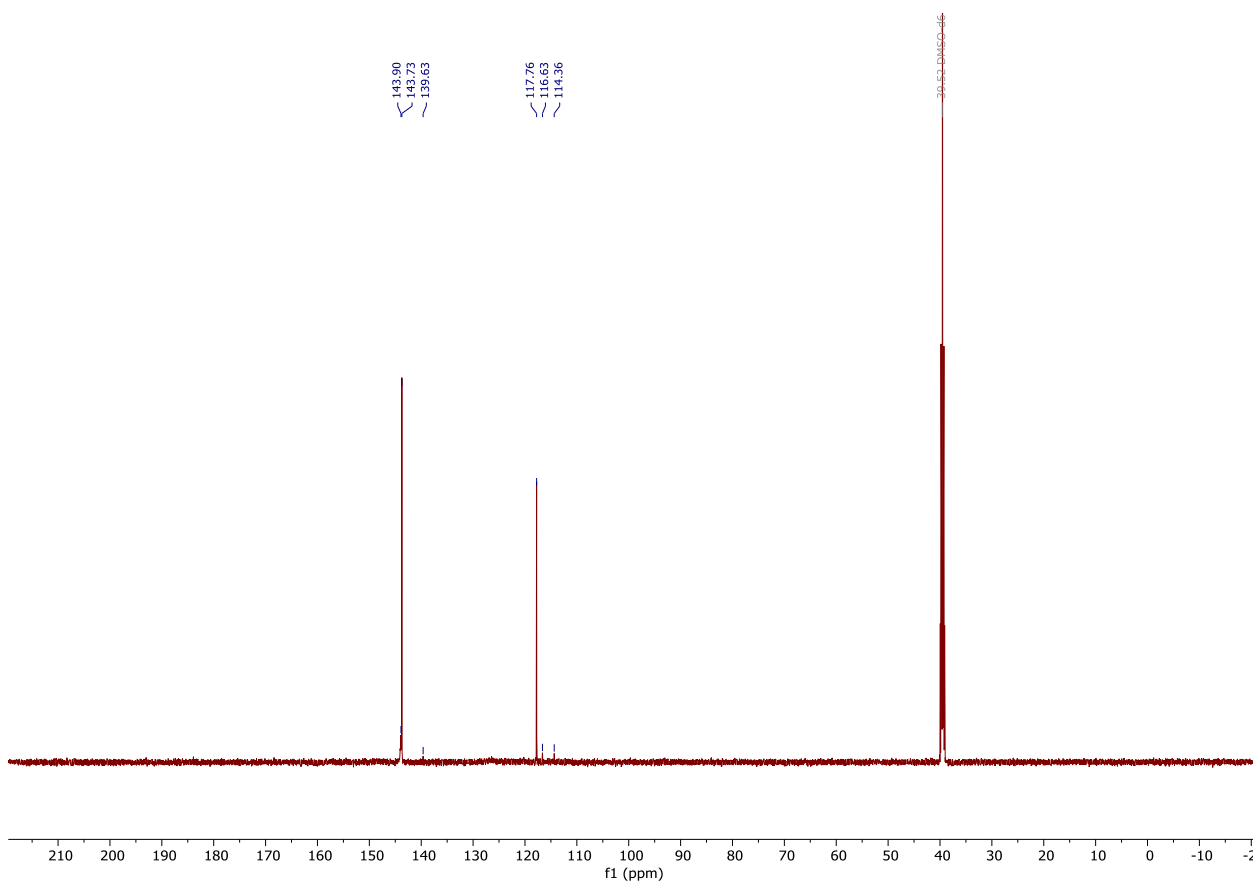

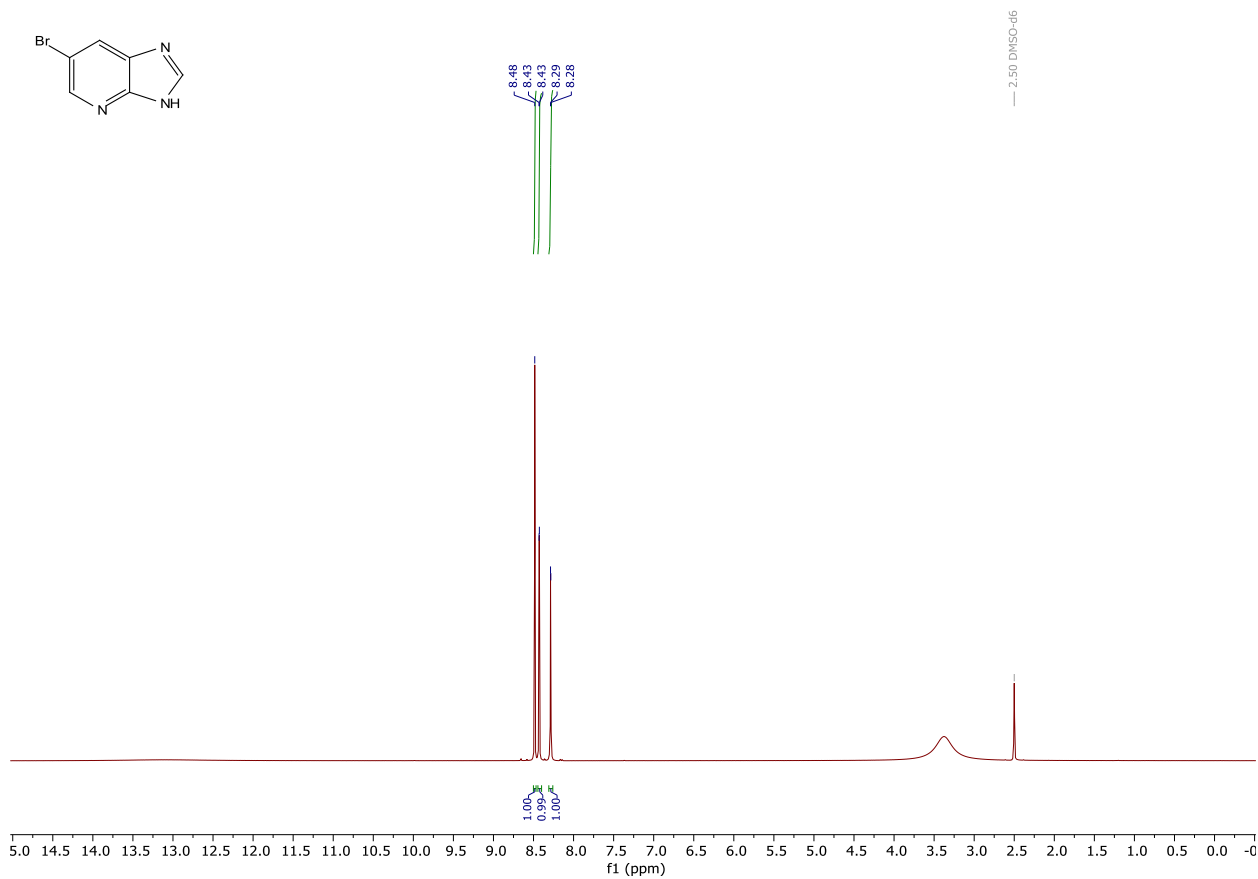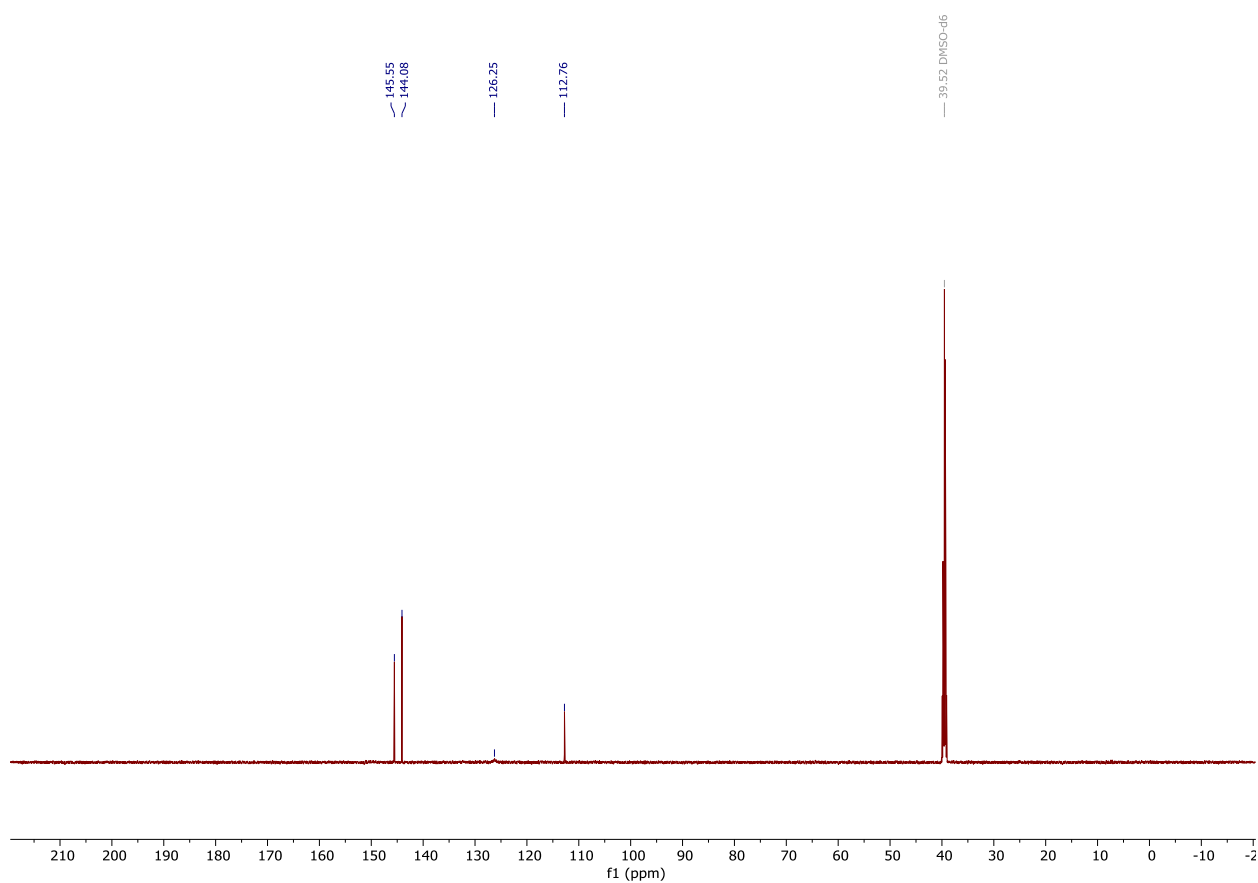

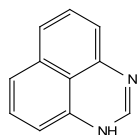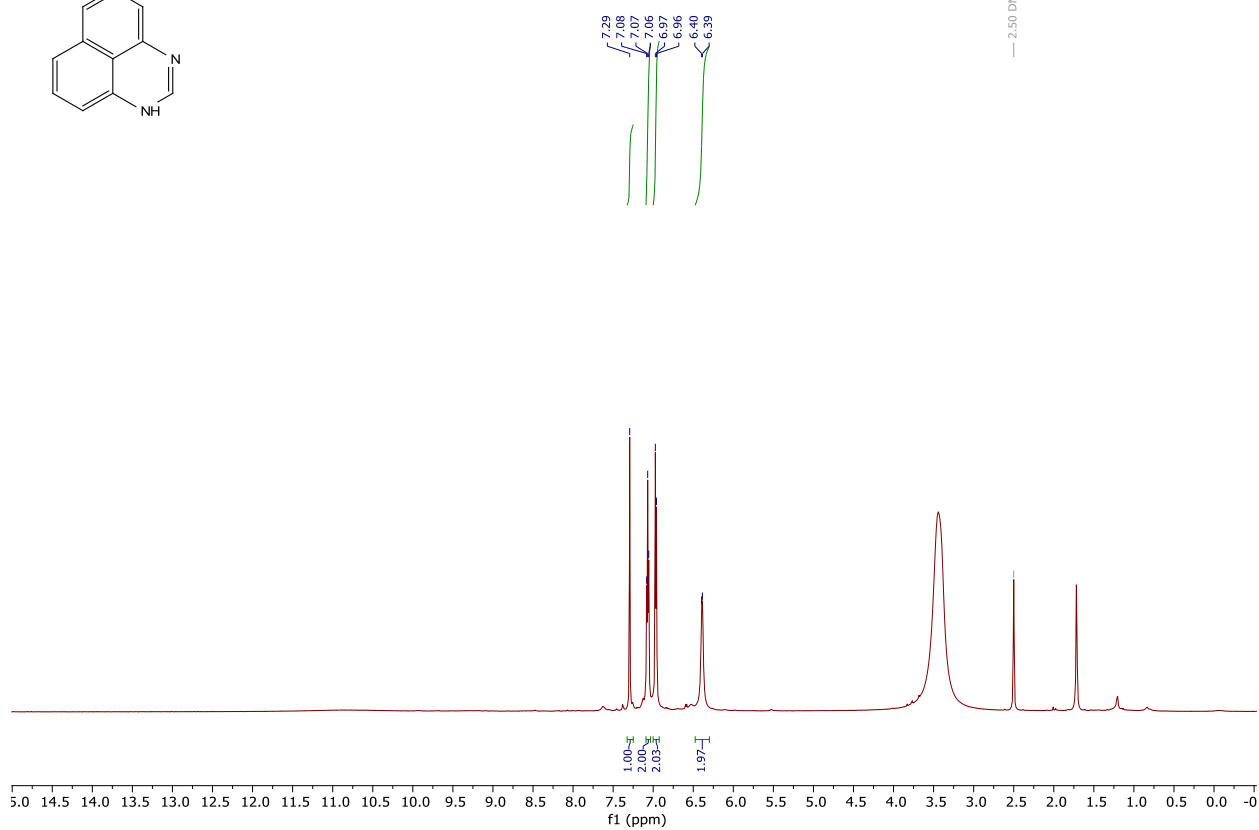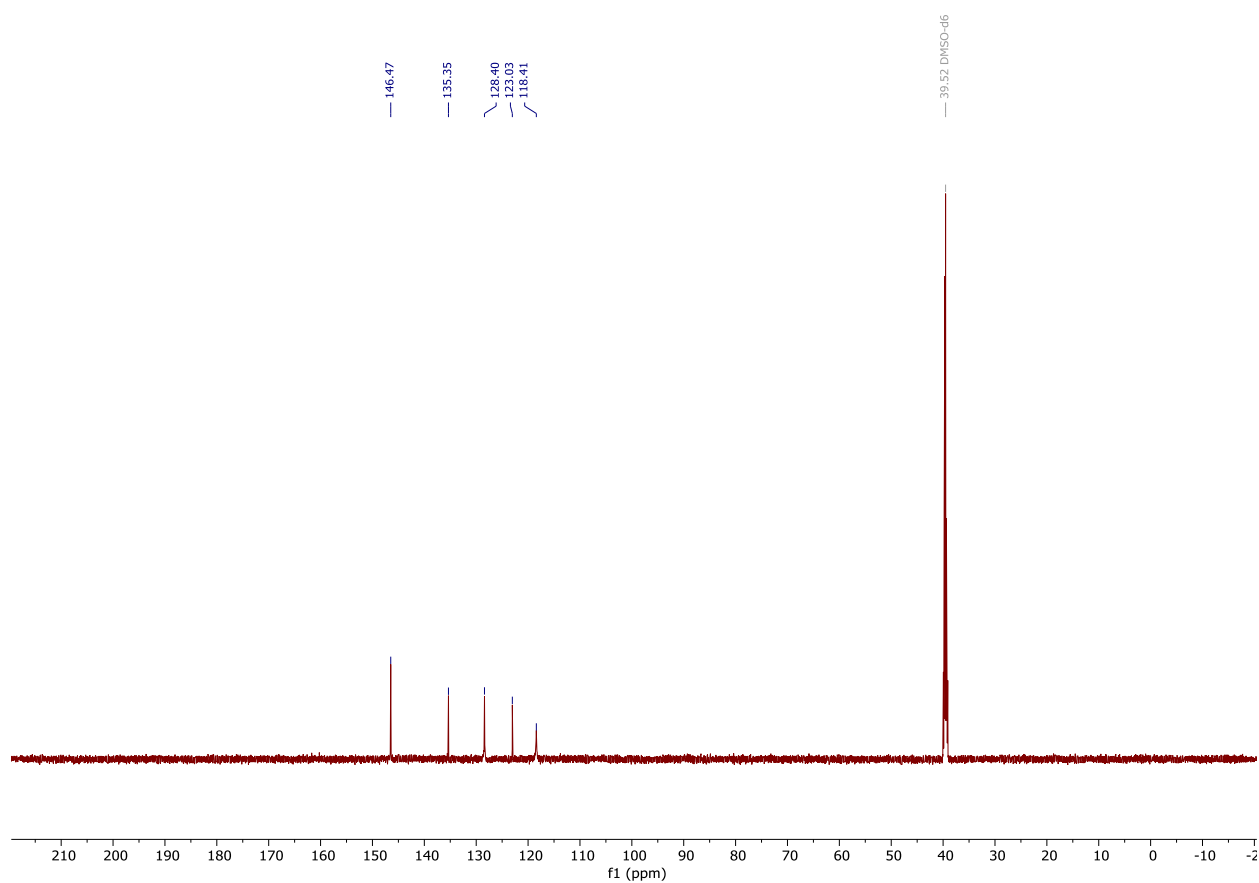

## 5. References

1. Jiang, S.; Dong, X.; Qiu, Y.; Chen, D.; Wu, X.; Jiang, S. A new ligand for copper-catalyzed amination of aryl halides to primary(hetero)aryl amines. *Tetrahedron Lett.* **2020**, *61*, 151683, doi:<https://doi.org/10.1016/j.tetlet.2020.151683>.
2. Panja, S.; Kundu, D.; Ahammed, S.; Ranu, B.C. Highly chemoselective reduction of azides to amines by Fe(0) nanoparticles in water at room temperature. *Tetrahedron Lett.* **2017**, *58*, 3457-3460, doi:<https://doi.org/10.1016/j.tetlet.2017.07.076>.
3. Liao, B.-S.; Liu, S.-T. Diamination of Phenylene Dihalides Catalyzed by a Dicopper Complex. *J. Org. Chem.* **2012**, *77*, 6653-6656, doi:10.1021/jo301244p.
4. Mo, C.; Zhang, Z.; Guise, C.P.; Li, X.; Luo, J.; Tu, Z.; Xu, Y.; Patterson, A.V.; Smaill, J.B.; Ren, X.; et al. 2-Aminopyrimidine Derivatives as New Selective Fibroblast Growth Factor Receptor 4 (FGFR4) Inhibitors. *ACS Med. Chem. Lett.* **2017**, *8*, 543-548, doi:10.1021/acsmchemlett.7b00091.
5. Sorribes, I.; Liu, L.; Corma, A. Nanolayered Co-Mo-S Catalysts for the Chemoselective Hydrogenation of Nitroarenes. *ACS Catal.* **2017**, *7*, 2698-2708, doi:10.1021/acscatal.7b00170.
6. Romero, A.H.; Cerecetto, H. A Common, Facile and Eco-Friendly Method for the Reduction of Nitroarenes, Selective Reduction of Poly-Nitroarenes and Deoxygenation of N-Oxide Containing Heteroarenes Using Elemental Sulfur. *Eur. J. Org. Chem.* **2020**, *2020*, 1853-1865, doi:<https://doi.org/10.1002/ejoc.202000064>.
7. Zhang, Y.-C.; Shen, Q.; Zhu, M.-W.; Wang, J.; Du, Y.; Wu, J.; Li, J.-X. Modified Quinoxaline-Fused Oleanolic Acid Derivatives as Inhibitors of Osteoclastogenesis and Potential Agent in Anti-Osteoporosis. *ChemistrySelect* **2020**, *5*, 1526-1533, doi:<https://doi.org/10.1002/slct.201904521>.
8. Ji, A.; Ren, W.; Ai, H.-w. A highly efficient oxidative condensation reaction for selective protein conjugation. *Chem. Comm.* **2014**, *50*, 7469-7472, doi:10.1039/C4CC01551G.
9. Chaudhary, P.; Gupta, S.; Muniyappan, N.; Sabiah, S.; Kandasamy, J. Regioselective Nitration of N-Alkyl Anilines using tert-Butyl Nitrite under Mild Condition. *J. Org. Chem.* **2019**, *84*, 104-119, doi:10.1021/acs.joc.8b02377.
10. Penierres-Carrillo, J.-G.; Ríos-Guerra, H.; Pérez-Flores, J.; Rodríguez-Molina, B.; Torres-Reyes, Á.; Barrera-Téllez, F.; González-Carrillo, J.; Moreno-González, L.; Martínez-Zaldívar, A.; Nolasco-Fidencio, J.-J.; et al. Reevaluating the synthesis of 2,5-disubstituted-1H-benzimidazole derivatives by different green activation techniques and their biological activity as antifungal and antimicrobial inhibitor. *J. Heterocycl. Chem.* **2020**, *57*, 436-455, doi:<https://doi.org/10.1002/jhet.3801>.
11. Zhang, Z.; Sun, Q.; Xia, C.; Sun, W. CO<sub>2</sub> as a C1 Source: B(C<sub>6</sub>F<sub>5</sub>)<sub>3</sub>-Catalyzed Cyclization of o-Phenylene-diamines To Construct Benzimidazoles in the Presence of Hydrosilane. *Org. Lett.* **2016**, *18*, 6316-6319, doi:10.1021/acs.orglett.6b03030.
12. Yu, B.; Zhang, H.; Zhao, Y.; Chen, S.; Xu, J.; Huang, C.; Liu, Z. Cyclization of o-phenylenediamines by CO<sub>2</sub> in the presence of H<sub>2</sub> for the synthesis of benzimidazoles. *Green Chem.* **2013**, *15*, 95-99, doi:10.1039/C2GC36517K.
13. Graham, T.H. Deprotection of N-benzylbenzimidazoles and N-benzylimidazoles with triethylsilane and Pd/C. *Tetrahedron Lett.* **2015**, *56*, 2688-2690, doi:<https://doi.org/10.1016/j.tetlet.2015.03.127>.
14. Zhu, K.; Hao, J.-H.; Zhang, C.-P.; Zhang, J.; Feng, Y.; Qin, H.-L. Diversified facile synthesis of benzimidazoles, quinazolin-4(3H)-ones and 1,4-benzodiazepine-2,5-diones via

- palladium-catalyzed transfer hydrogenation/condensation cascade of nitro arenes under microwave irradiation. *RSC Adv.* **2015**, 5, 11132-11135, doi:10.1039/C4RA15765F.
15. Xu, L.-L.; Zhu, J.-F.; Xu, X.-L.; Zhu, J.; Li, L.; Xi, M.-Y.; Jiang, Z.-Y.; Zhang, M.-Y.; Liu, F.; Lu, M.-c.; et al. Discovery and Modification of in Vivo Active Nrf2 Activators with 1,2,4-Oxadiazole Core: Hits Identification and Structure–Activity Relationship Study. *J. Med. Chem.* **2015**, 58, 5419-5436, doi:10.1021/acs.jmedchem.5b00170.
  16. Aziz, J.; Baladi, T.; Piguel, S. Direct Alkynylation of 3H-Imidazo[4,5-b]pyridines Using gem-Dibromoalkenes as Alkynes Source. *J. Org. Chem.* **2016**, 81, 4122-4133, doi:10.1021/acs.joc.6b00406.
  17. Gahlon, H.L.; Schweizer, W.B.; Sturla, S.J. Tolerance of Base Pair Size and Shape in Postlesion DNA Synthesis. *J. Am. Chem. Soc.* **2013**, 135, 6384-6387, doi:10.1021/ja311434s.
  18. Hanan, E.J.; Chan, B.K.; Estrada, A.A.; Shore, D.G.; Lyssikatos, J.P. Mild and General One-Pot Reduction and Cyclization of Aromatic and Heteroaromatic 2-Nitroamines to Bicyclic 2H-Imidazoles. *Synlett* **2010**, 2010, 2759-2764, doi:10.1055/s-0030-1259007.
  19. Available online: <https://macro.lsu.edu/howto/solvents/Dichloromethane.htm>
